# Supplementary material for: Implications of the introduction of new criteria for the diagnosis of gestational diabetes: a health outcome and cost of care analysis
Source: PubMed Central journal article supplement — BMJ Open. 2019 Jan 4;9(1):e023293. doi: 10.1136/bmjopen-2018-023293 (PMC6326329; doi:10.1136/bmjopen-2018-023293), 2019-01-04
Supplement: bmjopen-2018-023293.draft_revisions.pdf [file bmjopen-2018-023293.draft_revisions.pdf]

# BMJ Open

BMJ Open is committed to open peer review. As part of this commitment we make the peer review history of every article we publish publicly available.

When an article is published we post the peer reviewers' comments and the authors' responses online. We also post the versions of the paper that were used during peer review. These are the versions that the peer review comments apply to.

The versions of the paper that follow are the versions that were submitted during the peer review process. They are not the versions of record or the final published versions. They should not be cited or distributed as the published version of this manuscript.

BMJ Open is an open access journal and the full, final, typeset and author-corrected version of record of the manuscript is available on our site with no access controls, subscription charges or pay-per-view fees (<http://bmjopen.bmj.com>).

If you have any questions on BMJ Open's open peer review process please email [info.bmjopen@bmj.com](mailto:info.bmjopen@bmj.com)

# BMJ Open

## Implications of the introduction of new criteria for the diagnosis of gestational diabetes: a health outcome and economic analysis

|                               |                                                                                                                                                                                                                                                                                                                                                                             |
|-------------------------------|-----------------------------------------------------------------------------------------------------------------------------------------------------------------------------------------------------------------------------------------------------------------------------------------------------------------------------------------------------------------------------|
| Journal:                      | <i>BMJ Open</i>                                                                                                                                                                                                                                                                                                                                                             |
| Manuscript ID                 | bmjopen-2018-023293                                                                                                                                                                                                                                                                                                                                                         |
| Article Type:                 | Research                                                                                                                                                                                                                                                                                                                                                                    |
| Date Submitted by the Author: | 05-Apr-2018                                                                                                                                                                                                                                                                                                                                                                 |
| Complete List of Authors:     | Cade, Thomas; Royal Women's Hospital, Pregnancy Research Centre; University of Melbourne, Obstetrics and Gynaecology<br>Polyakov, Alexander; Royal Women's Hospital, Reproductive Services; University of Melbourne, Obstetrics and Gynaecology<br>Brennecke, Shaun; Royal Women's Hospital, Pregnancy Research Centre; University of Melbourne, Obstetrics and Gynaecology |
| Keywords:                     | OBSTETRICS, Maternal medicine < OBSTETRICS, Fetal medicine < OBSTETRICS                                                                                                                                                                                                                                                                                                     |
|                               |                                                                                                                                                                                                                                                                                                                                                                             |

SCHOLARONE™  
Manuscripts

Peer Review Only

# Implications of the introduction of new criteria for the diagnosis of gestational diabetes: a health outcome and economic analysis

Thomas J Cade<sup>1,2,3</sup>

Alexander Polyakov<sup>3,4</sup>

Shaun P Brennecke<sup>2,3</sup>

1. Diabetes Service, Royal Women's Hospital, Parkville, Victoria, Australia
2. Pregnancy Research Service, Department of Maternal Fetal Medicine, Royal Women's Hospital, Parkville, Victoria, Australia
3. Department of Obstetrics and Gynaecology, University of Melbourne, Parkville, Victoria, Australia
4. Department of Reproductive Biology, Royal Women's Hospital, Parkville, Victoria, Australia

Corresponding author: Dr Thomas Cade, Royal Women's Hospital, 20 Flemington Rd, Parkville, 3052, Australia.  
Email: [tom.cade@thewomens.org.au](mailto:tom.cade@thewomens.org.au) telephone +61 3 83452000

Word Count: 2719

## Abstract

### *Objective*

To identify effects on health outcomes from implementing new criteria diagnosing gestational diabetes (GDM) and to analyse costs-of-care associated with this change.

### *Design*

Large retrospective cohort study comparing data from the calendar year before (2014) and after (2016) the change.

### *Setting*

Single, tertiary level, university-affiliated, maternity hospital.

### *Participants*

All women giving birth in the hospital, excluding those with pre-existing diabetes or multiple pregnancy.

### *Main outcome measures*

Primary outcomes were caesarean section, birthweight > 90<sup>th</sup> percentile for gestation, hypertensive disorder of pregnancy and pre-term birth less than 37 weeks. A number of secondary outcomes reported to be associated with GDM were also analysed were also analysed.

Care packages were derived for those without GDM, diet-controlled GDM and GDM requiring insulin. The Institutional Business Reporting Unit data for average occasions of service, pharmacy schedule for the costs of consumables and medications, and Medicare Benefits Schedule ultrasound services were used for costing each package. All costs were estimated in figures from the end of 2016 negating the need to adjust for Consumer Price Index increases.

### *Results*

There was an increase in annual incidence of GDM of 74% without overall improvements in primary health outcomes. This incurred a gross cost increase of \$904 178 and net of \$560 093

### *Conclusion*

New criteria for the diagnosis of GDM have not resulted in significant improvements in key health outcomes in a large tertiary maternity hospital but have significantly increased the incidence of GDM and the overall cost of GDM care.

### Strengths and limitations of this study

- Australia is one of the only major Western countries to introduce universal screening for GDM by new International Association of Diabetes in Pregnancy Study Group criteria and is uniquely poised to assess concerns about increased annual incidence and costs of care compared to any potential improvement in health outcomes.
- Concerns about an increase in diagnoses and “over-medicalisation” of women who erstwhile would have been considered normal have given many countries reason for caution in adopting the new criteria: our findings may assist in decision making regarding this public health policy.
- As with any large retrospective audit, there are potential methodological flaws in data analysis, however we have assessed the implication of adopting this criteria on an entire cohort (not a specific subgroup) minimising the risks of selection bias.
- A major problem with assessing changes in diagnostic criteria in GDM lies within being unable to retrospectively identify those who were potentially underdiagnosed under older systems and assess their outcomes. We have thus assessed the impact on a large tertiary hospital as a whole and quantified the costs associated with the increased burden or care.

## Introduction

Diagnostic criteria for gestational diabetes (GDM) in Australia changed following a 2014 consensus statement by the Australian Diabetes in Pregnancy Society (ADIPS)<sup>1</sup> ratifying support for the International Association of Diabetes in Pregnancy Study Group's recommendations<sup>2</sup> (see table 1). These, in turn, used data from the Hyperglycaemia and Adverse Pregnancy Outcome (HAPO) trial,<sup>3</sup> which was a large, prospective, multi-centre study examining the influence of increasing blood glucose levels on a fasting glucose tolerance test on eventual adverse pregnancy outcome.

Previously, diagnostic criteria for GDM in Australia were derived from an earlier ADIPS consensus statement published in 1991<sup>4</sup> and re-endorsed in 1998<sup>5</sup> (see Table 1). It was based on the observed distributions of blood glucose levels tested in pregnant women at various maternity centres. These older criteria had been widely utilised for the last two decades in many Australian maternity centres including our own.

(Table 1 goes about here).

Since the introduction of the new criteria, concerns have focussed on the anticipated increase in annual incidence of GDM that these new criteria will cause and the resultant implications for workload. Early estimates of an annual increase of 35%<sup>6</sup> were followed by later data suggesting an almost doubling in some populations.<sup>7</sup> Although many major maternity centres in Australia have adopted the new criteria, a 2016 survey found variable adoption in Australia<sup>6</sup> and the criteria have not yet found international acceptance despite WHO endorsement.<sup>9, 10, 11</sup>

While it was never the intention of the HAPO authors to suggest a specific annual incidence for GDM, it is important to remember that the new criteria and the suggested relative risk reductions were derived from an untreated population. They were not derived from comparing the new criteria to any other existing methods of diagnosis. While the change may be important for uniformity in diagnosis and may result in clinically important outcomes in individuals previously not diagnosed with GDM, it is also important to assess whether any improvements are seen across large populations and, if so, whether they justify any increase in costs-of-care.

We aimed to estimate the impact of this change in a large tertiary maternity hospital by examining an entire cohort of pregnant women immediately before and immediately after the new criteria were adopted. Specifically, we wished to examine the increase in annual incidence of GDM, assign an appropriate cost-of-care to the high-risk model employed for GDM and compare this to any hospital-wide change in the HAPO outcomes upon which the new criteria are based.

## Patients and Methods

As the new criteria for diagnosing GDM were introduced in our hospital in mid 2015, we selected 2014 as the last full calendar year of diagnosis under 1991/1998 ADIPS criteria<sup>4,5</sup> and 2016 as the first full year of diagnosis under the new IADPSG criteria.<sup>2</sup> All women having care and delivering within the hospital were included for analysis, with exclusion limited

1  
2  
3 only to pre-existing diabetes (i.e. those who did not undergo screening for GDM) and  
4 multiple pregnancy (an exclusion criterion in the HAPO trial).  
5

6 Clinical care during the periods of study was divided into three groups: those without GDM,  
7 GDM managed with dietary measures, and GDM requiring insulin. For occasions of clinical  
8 review, such as antenatal clinic consultations, group class and phone-call consultations, and  
9 pregnancy day care admissions, cost was estimated from “average occasion of service”  
10 figures for the relevant health professional, as collected by the institutional Business  
11 Performance Reporting Unit. The pharmacy schedule was consulted for the costs of  
12 consumables and medications. The Medicare Benefits Schedule was considered the most  
13 reproducible and valid estimation for the cost of ultrasound services. All costs were  
14 estimated in figures from the end of 2016, thus negating the need to adjust 2014 figures for  
15 consumer price index (CPI) or other potential inflationary changes.  
16  
17

18  
19 Women diagnosed with GDM receive a three-hour group class with a diabetes educator,  
20 dietician and physiotherapist. In addition, most have a follow-up one-on-one session with a  
21 dietician, phone consultations with diabetes educators, two extra antenatal clinics,  
22 assessment by consultant obstetricians rather than by midwives or junior medical staff, and  
23 a growth ultrasound. They also require a glucometer and testing strips.  
24

25  
26 If dietary measures fail to control blood glucose levels (BGLs) at acceptable levels, they also  
27 require insulin, a one-on-one session with a diabetes educator, an extra antenatal clinic,  
28 often a second growth scan and sometimes fetal heart rate monitoring via cardiotocography  
29 (CTG).  
30

31 Demographic data were collected for each group, including age, body mass index (BMI), pre-  
32 existing polycystic ovarian syndrome (PCOS), smoking, parity and previous caesarean  
33 section (LUSCS).  
34  
35

36 Primary outcomes were those upon which the new criteria were based, namely caesarean  
37 section rates, hypertensive disorder of pregnancy, birthweight greater than the 90<sup>th</sup>  
38 percentile, pre-term birth less than 37 weeks.<sup>2</sup>  
39

40  
41 Additional maternal outcomes were induction of labour, instrumental birth, third degree  
42 tear and post-partum haemorrhage. Additional fetal outcomes were greater than the 95<sup>th</sup>  
43 percentile, less than the 10<sup>th</sup> percentile, admission to special care nursery (SCN) or neonatal  
44 intensive care (NICU), estimated gestational age, pre-term birth less than 34 weeks, birth  
45 trauma, respiratory distress, jaundice requiring phototherapy, hypoglycaemia, stillbirth,  
46 neonatal death, and Apgar score less than 7 at 5 minutes.  
47

48  
49 Neonatal birthweights were plotted by percentile as described by the latest Australian birth  
50 charts.<sup>15</sup> Neonatal hypoglycaemia was defined as any ward-measured BGL less than 2.6  
51 mmol/L.  
52

53 Data were collected prospectively by the institutional Quality and Safety Unit from the  
54 Maternity Care Information System (“MCIS”, GE Healthcare, Little Chanfont, UK) and  
55 collated in MS Excel spreadsheets (Microsoft, Redmond, USA). Data were analysed after  
56 selecting the demographics and outcomes of interest. Maternal and neonatal  
57 characteristics were compared using descriptive statistics. Discrete variables are reported in  
58  
59

1  
2  
3 the tables as a mean percentage and continuous variables are reported as mean (95%  
4 confidence interval). For univariate analyses, discrete variables were analysed using Fisher's  
5 exact test or Pearson's chi-squared test and continuous variables using Student's t-test.  
6 Multivariate analysis with logistic regression was planned for any outcome which met  
7 statistical and clinical significance and had documented risk factors other than GDM. P-  
8 values are reported in the final column of all tables with less than 0.05 considered  
9 statistically significant and highlighted in bold. Statistical analysis was performed using  
10 STATA 9.2 (StataCorp, Texas, USA).  
11

12  
13 The study was approved as an anonymised audit by the Institutional Research and Ethics  
14 Committee with identifying information removed before analysis.  
15

### 16 *Patient and Public Involvement*

17  
18 This was an anonymised retrospective audit, thus patients and the public were not required  
19 to be directly involved in recruitment or conduct of the study. Indeed, emphasis was given  
20 toward assessing the implications of this public health policy on a patient cohort as a whole  
21 rather than subgroup or individual outcomes.  
22  
23

## 24 **Results**

### 25 *Demographics and Health Outcomes*

26  
27 In 2014, there were 7010 pregnant women of whom 416 were diagnosed with GDM  
28 (incidence 5.93%) and in 2016, there were 7488 pregnant women of whom 774 were  
29 diagnosed with GDM (incidence 10.3%). The demographics of the two cohorts are shown in  
30 Table 2.  
31  
32

33  
34  
35 (Table 2 goes about here).  
36

37 Although the second cohort was statistically significantly older, this was only by a mean of  
38 four months. The diagnosis of PCOS was higher but overall rates were low and possibly  
39 under-reported. These two findings were statistically significant but unlikely to be clinically  
40 relevant. The relative increase of 73.7% in the annual incidence of GDM is most likely  
41 attributable to the change in diagnosis rather than to any changed demographic factors.  
42  
43

44 The maternal outcomes are shown in Table 3 and the fetal outcomes in Table 4, with the  
45 HAPO/IADPSG outcomes highlighted in bold.  
46

47  
48 (Tables 3 and 4 go about here).  
49

50 Following the introduction of the new GDM criteria, there has not been a hospital-wide  
51 decrease in the main outcomes reported in the sub-analysis of the HAPO trial, most  
52 particularly in birthweight >90<sup>th</sup> percentile for gestation, caesarean section, hypertensive  
53 disorder of pregnancy or pre-term birth <37 weeks. However, there has been a hospital-  
54 wide decrease in documented birth trauma, neonatal death and birthweight greater than  
55 the 95<sup>th</sup> percentile in the fetal outcomes and an increase in induction of labour and  
56 instrumental birth in the maternal outcomes.  
57  
58

The decrease in birth trauma was due to a change in coding practices between 2014 and 2016 allowing only those injuries directly related to the mode of birth and requiring treatment to be recorded. The decrease in neonatal death rates was unexplained and, on further analysis, only confined to the non-diabetic population. Therefore, the change may have resulted in a small reduction in very large babies but seemed to have no relevant clinical reduction in any other outcome.

### *Costs of care*

The average antenatal care package for women without GDM costs \$923 and for the 15% that require post-dates care this is \$1742 (when extra clinics, and CTG and amniotic fluid monitoring are required). The care package for women with GDM who do not need insulin is \$2026 and for those that do need insulin is \$2534 (or \$3826 if CTG monitoring from 36 weeks is undertaken: on audit during the study period, this occurred in 50% of patients).

In 2014, 210 women with GDM were controlled with dietary measures and 206 required insulin. The costs of care for GDM was calculated as follows:

GDM diet controlled:  $210 \times \$2026 = \$425\ 460$

GDM insulin controlled:  $0.5 \times 206 \times \$2534 + 0.5 \times 206 \times \$3826 = \$655\ 080$

**Total = \$1 080 540**

In 2016, 413 women with GDM were controlled with dietary measures and 361 required insulin. The costs of care for GDM was calculated as follows:

GDM diet controlled:  $413 \times \$2026 = \$836\ 738$

GDM insulin controlled:  $0.5 \times 361 \times \$2534 + 0.5 \times 361 \times \$3826 = \$1\ 147\ 980$

**Total = \$1 984 718**

The gross cost increase for care of women with GDM was thus \$904 178. The net cost increase can be determined by attributing the cost of standard care to the excess diagnoses of GDM. If we round the incidence of GDM in 2014 up to 6% and use this with the total number of deliveries in 2016 ( $n=7420$ ), the approximate number of women diagnosed with GDM if the criteria did not change would have been:  $0.06 \times 7420 = 445$ . The approximate excess number of cases of GDM is the total in 2016 ( $n = 774$ ) minus this figure ( $n = 445$ ) which is:  $774 - 445 = 329$ . We can then apply this number to routine care (bearing in mind 15% of those undergoing routine care require post-dates monitoring) as follows:

$$0.85 \times 329 \times \$923 + 0.15 \times 329 \times \$1742 = \$344\ 085$$

The net cost increase is then the gross cost increase minus this figure:

$$\$904\ 178 - \$344\ 085 = \$560\ 093$$

The hospital has thus spent a gross of **\$904 178** or a net of **\$560 093** caring for women with GDM because of the change in criteria.

### **Discussion**

1  
2  
3 The HAPO trial<sup>3</sup> was a landmark study for several reasons, namely its sheer size (over 25 000  
4 pregnant women), its robust statistical methods, and its aim to unify disparate international  
5 views about the significance of GDM and the best way to diagnose it. The IADPSG sub-  
6 analysis<sup>2</sup> used important clinical outcomes in identifying a “best-fit” for cut-off values within  
7 the 75-gram glucose tolerance test (GTT) to diagnose GDM: most are routinely measured in  
8 clinical care (with the exception of cord C-peptide and fetal fat distribution). The resulting  
9 recommendation was for a 75-gram GTT for all women (regardless of baseline risk) with  
10 levels of greater than 5.1 mmol/L at fasting, 10 mmol/L at one-hour and 8.5 mmol/L at two-  
11 hours considered diagnostic.  
12  
13

14 Despite a WHO statement endorsing the new criteria,<sup>16</sup> there has been a failure of  
15 international acceptance to screen for GDM in this way. The National Institute of Clinical  
16 Excellence which guides care in the United Kingdom is perhaps the most striking example,  
17 recommending only screening those patients with risk factors and using levels of greater  
18 than or equal to 5.6 mmol/L at fasting and 7.8 mmol/L at two-hours.<sup>9</sup> A sophisticated  
19 economic evaluation found this approach to be superior in their population.<sup>17</sup> The latest  
20 Cochrane review concluded that there is insufficient evidence to prefer any particular  
21 screening method for GDM over another.<sup>18</sup>  
22  
23

24 The new criteria were a major change to established practice in Australia. The abolition of  
25 the non-fasting glucose challenge test (GCT) and the introduction of the one-hour BGL on  
26 the GTT were both new. The fasting BGL was tightened from greater than or equal to 5.5  
27 mmol/L to 5.1 mmol/L and the two-hour level eased from greater than or equal to 8.0  
28 mmol/L to 8.5 mmol/L. Some studies have tried to examine outcomes in patients who may  
29 have been diagnosed with GDM under the new system but not under the old.<sup>19,20,21</sup>  
30 Generally, they have reported groups at higher risk of adverse outcome (particularly  
31 caesarean section and large babies) who may have been previously underdiagnosed, but  
32 such an approach is flawed because of the abolition of the glucose challenge test and the  
33 introduction of the previously untested one-hour BGL. It thus is not possible to  
34 retrospectively examine the outcomes of those who may have had a false negative on the  
35 GCT or those who may have only tested positive on the new one-hour level.  
36  
37  
38

39 A separate approach, one adopted by this study, is to quantify any overall changes in clinical  
40 outcomes and attribute a cost to the increased burden of care and a saving to any potential  
41 outcome improvements.  
42  
43

44 The strengths of this study include using a single, large, tertiary centre with a uniform urban  
45 catchment area and relatively stable demographics over the study period. The numbers  
46 were large with over 7000 births per year in each cohort, and the costs of care were  
47 quantifiable by an established institutional Business Performance Reporting Unit. Outcomes  
48 were readily identified from existing data management systems and were usually  
49 categorical (often binary) and not requiring extensive further investigation or statistical  
50 analysis. The weaknesses of the study are those always inherent within retrospective data,  
51 including the potential for treatment or ascertainment bias. However, as the outcomes of  
52 the entire cohort (rather than just those diagnosed with GDM were analysed) this was likely  
53 to be minimised. The latter point is important as the aim of the study was to estimate a  
54 public health impact overall, as a result of a public health policy change.  
55  
56  
57  
58  
59  
60

1  
2  
3 We demonstrated a relative increased incidence of GDM of 74%, but we were unable to  
4 demonstrate any statistically significant improvements in major outcomes across the  
5 hospital as a whole. There was possibly a small improvement in the incidence of very large  
6 babies (greater than the 95<sup>th</sup> percentile) but the absolute changes were small (0.7%) and  
7 there was no change in babies greater than the 90<sup>th</sup> percentile. An apparent improvement  
8 in birth trauma was due to a change in coding practices, and an improvement in the  
9 neonatal death rate was isolated to the non-diabetic population and also low in absolute  
10 terms (0.2%).  
11

12  
13 We have also demonstrated an increase in gross costs of over A\$900 000 and in net costs of  
14 over A\$500 000 per annum. This is primarily due to employing a “high-risk” model of care to  
15 all women with GDM.  
16

17  
18 While the new criteria are laudable in their efforts at uniformity of diagnosis and adverse  
19 outcome avoidance, and possibly have improved clinical outcomes in sub-groups of women  
20 previously not diagnosed with GDM, there is lack of quality evidence supporting their  
21 superiority over other systems of diagnosis. Thus, further research is needed in three main  
22 areas. Firstly, it would be desirable to have prospective (and ideally randomised controlled  
23 trial) evidence examining the impact of this system of diagnosis over others employed  
24 around the world. Secondly, long-term outcomes of the women with GDM and their  
25 children may uncover health benefits not accounted for in immediate analyses like those  
26 presented in this study. Finally, it is important to investigate more economic ways of  
27 antenatally managing women with GDM particularly in the lower risk group, for example  
28 those easily controlled with simple dietary measures.  
29  
30

### 31 **Conclusion**

32  
33  
34 The annual incidence of GDM has immediately and markedly increased due to the change in  
35 diagnostic criteria with a substantial increase in cost of care and with no overall  
36 improvement in clinical outcomes. We suggest that these results tell a cautionary tale about  
37 the routine adoption of even internationally endorsed clinical guidelines which have not  
38 been validated by rigorous randomized studies. In the present case, countries like the UK  
39 which chose not to adopt the new criteria for diagnosing GDM will have saved considerable  
40 resources without resultant clinical detriment. On the other hand, countries like Australia  
41 which adopted these new criteria in good faith have incurred considerable extra costs  
42 without commensurate clinical improvement.  
43  
44  
45

### 46 **Declaration of Interests**

47  
48  
49 There were no conflicts of interest with regards to any of the three authors.  
50

### 51 **Contributor and guarantor information**

52 The corresponding author (TC) was responsible for the study design, literature review,  
53 collection and analysis of data, interpretation of clinical findings, writing of the manuscript  
54 and decision for submission. TC is responsible for the overall content and acts as guarantor.  
55 SB supervised the project and contributed to all of the above in a consulting role. AP  
56 contributed to planning and executing appropriate statistical analysis and with  
57  
58  
59

1  
2  
3 interpretation of the data. All authors contributed to the final manuscript review and final  
4 submission.  
5  
6  
7  
8  
9  
10  
11  
12  
13  
14  
15  
16  
17  
18  
19  
20  
21  
22  
23  
24  
25  
26  
27  
28  
29  
30  
31  
32  
33  
34  
35  
36  
37  
38  
39  
40  
41  
42  
43  
44  
45  
46  
47  
48  
49  
50  
51  
52  
53  
54  
55  
56  
57  
58  
59  
60

For peer review only

### **Role of the funding source**

The Royal Australian and New Zealand College of Obstetrics and Gynaecology, who awarded the Luke Proposch Perinatal Research Scholarship to the corresponding author to financially support this research, had no role in the study design, data collection, analysis and interpretation, writing of the report or decision to submit for publication. The corresponding author had full access to the data in the study and final responsibility for the decision to submit for publication.

### **Transparency Declaration**

The corresponding author (TC) affirms that the manuscript is an honest, accurate, and transparent account of the study being reported and that no important aspects of the study have been omitted.

## Tables

Table 1 1991/1998 ADIPS versus 2014 IADPSG Criteria for diagnosing GDM

|                        | 1991/1998 ADIPS                                                                               |                                               | 2014 IADPSG                                               |                                                                | 2015 NICE                                               |                                                    |
|------------------------|-----------------------------------------------------------------------------------------------|-----------------------------------------------|-----------------------------------------------------------|----------------------------------------------------------------|---------------------------------------------------------|----------------------------------------------------|
|                        | Type of test                                                                                  | Positive criteria                             | Type of test                                              | Positive criteria                                              | Type of test                                            | Positive criteria                                  |
| <b>Screening test</b>  | 50g non-fasting glucose challenge test<br><b>or</b><br>75g non-fasting glucose challenge test | ≥ 7.8mmol/L<br><br>≥ 8.0mmol/L                | Nil                                                       | N/A                                                            | Clinical risk assessment                                | Any one of five clinical risk factors <sup>9</sup> |
| <b>Diagnostic test</b> | 75g, 2-hour fasting glucose tolerance test (two levels)                                       | Fasting ≥ 5.5mmol/L<br><br>2 hour ≥ 8.0mmol/L | 75g, 2-hour fasting glucose tolerance test (three levels) | Fasting ≥ 5.1mmol/L<br>1 hour ≥ 10mmol/L<br>2 hour ≥ 8.5mmol/L | 75g, 2-hour fasting glucose tolerance test (two levels) | Fasting ≥ 5.6mmol/L<br><br>2 hour ≥ 7.8mmol/L      |

Table 2 Demographics of the 2014 and 2016 cohorts

|                          | 2014               | 2016               | p-value       |
|--------------------------|--------------------|--------------------|---------------|
| Total Deliveries         | 7010               | 7488               | n/a           |
| Age (yr)                 | 30.9 (30.8 – 31.0) | 31.2 (31.1 – 31.3) | <b>0.0016</b> |
| BMI (kg.m <sup>2</sup> ) | 24.8 (24.7 – 24.9) | 24.7 (24.6 – 24.8) | 0.28          |
| PCOS                     | 110 (1.57%)        | 151 (2.02%)        | <b>0.043</b>  |
| Smoking                  | 326 (4.65%)        | 303 (4.05%)        | 0.075         |
| Parity ≥ 1               | 3228 (46.1%)       | 3365 (44.9%)       | 0.18          |
| Previous LUSCS           | 960 (13.7%)        | 1027 (13.7%)       | 0.45          |

Table 3 Overall Maternal Outcomes in 2014 and 2016

|                              | 2014         | 2016         | p-value     |
|------------------------------|--------------|--------------|-------------|
| <b>Hypertensive disorder</b> | 332 (4.74%)  | 361 (4.82%)  | 0.81        |
| Induction of labour          | 2407 (34.3%) | 2725 (36.4%) | <b>0.01</b> |
| <b>Overall LUSCS rate</b>    | 1963 (28.0%) | 2070 (27.6%) | 0.63        |
| Emergency LUSCS rate         | 1088 (15.5%) | 1076 (14.3%) | 0.05        |
| Instrumental birth           | 1316 (18.8%) | 1513 (20.2%) | <b>0.03</b> |
| Third degree tear            | 217 (3.1%)   | 197 (2.6%)   | 0.09        |
| PPH                          | 1685 (24.0%) | 1765 (23.6%) | 0.51        |

Table 4 Overall Fetal Outcomes in 2014 and 2016

|                                    | 2014               | 2016               | p-value           |
|------------------------------------|--------------------|--------------------|-------------------|
| EGA                                | 38.6 (38.6 – 38.7) | 38.6 (38.5 – 38.6) | 0.18              |
| Stillbirth                         | 36 (0.51%)         | 40 (0.53%)         | 0.86              |
| NND                                | 29 (0.41%)         | 16 (0.21%)         | <b>0.03</b>       |
| Hypoglycaemia                      | 154 (2.20%)        | 170 (2.27%)        | 0.77              |
| Respiratory distress               | 140 (2.00%)        | 170 (2.27%)        | 0.26              |
| Jaundice<br>requiring phototherapy | 112 (1.60%)        | 135 (1.80%)        | 0.34              |
| Birth trauma                       | 142 (2.03%)        | 28 (0.37%)         | <b>&lt; 0.001</b> |
| Apgar < 7 at 5 min                 | 280 (3.99%)        | 286 (3.82%)        | 0.59              |
| <b>Birth &lt; 37 weeks</b>         | 645 (9.20%)        | 671 (8.96%)        | 0.62              |
| Birth < 34 weeks                   | 292 (4.17%)        | 325 (4.34%)        | 0.61              |
| Shoulder dystocia                  | 102 (1.46%)        | 131 (1.75%)        | 0.16              |
| Admission to NICU                  | 320 (4.56%)        | 366 (4.89%)        | 0.36              |
| Admission to SCN                   | 534 (7.62%)        | 537 (7.17%)        | 0.31              |
| <b>Birthweight (g)</b>             | 3289 (3274 – 3304) | 3275 (3271 – 3293) | 0.21              |
| Birthweight > 95%                  | 300 (4.31%)        | 269 (3.61%)        | <b>0.03</b>       |
| <b>Birthweight &gt; 90%</b>        | 577 (8.28%)        | 586 (7.86%)        | 0.36              |
| Birthweight < 10%                  | 570 (8.18%)        | 616 (8.27%)        | 0.85              |

1  
2  
3  
4  
5  
6  
7  
8  
9  
10  
11  
12  
13  
14  
15  
16  
17  
18  
19  
20  
21  
22  
23  
24  
25  
26  
27  
28  
29  
30  
31  
32  
33  
34  
35  
36  
37  
38  
39  
40  
41  
42  
43  
44  
45  
46  
47  
48  
49  
50  
51  
52  
53  
54  
55  
56  
57  
58  
59  
60

For peer review only

## References

1. ADIPS Consensus Guidelines for the Testing and Diagnosis of Hyperglycaemia in Pregnancy in Australia and New Zealand. [www.adips.org.au](http://www.adips.org.au) (accessed January 2018). 2014.
2. Metzger BE, Gabbe SG, Persson B, et al. International association of diabetes and pregnancy study groups recommendations on the diagnosis and classification of hyperglycemia in pregnancy. *Diabetes Care*. 2010;33:676-82
3. Metzger BE, Lowe LP, Dyer AR, et al. Hyperglycemia and adverse outcomes. *N Engl J Med*. 2008;358:1991-2002
4. Martin FI, Vogue A, Dargaville R, et al. The diagnosis of gestational diabetes. *Med J Aust*. 1991;155:112
5. Hoffman L, Nolan C, Wilson JD, Oats JJ, Simmons D. Gestational diabetes mellitus--management guidelines. The Australasian Diabetes in Pregnancy Society. *Med J Aust*. 1998;169:93-7
6. Moses RG, Morris GJ, Petocz P, San Gil F, Garg D. The impact of potential new diagnostic criteria on the prevalence of gestational diabetes mellitus in Australia. *Med J Aust*. 2011;194:338-40.
7. Wong VW, Lin A, Russell H. Adopting the new World Health Organization diagnostic criteria for gestational diabetes: How the prevalence changes in a high-risk region in Australia. *Diabetes Res Clin Pract*. 2017;129:148-53
8. Flack JR, Ross GP. Survey on testing for gestational diabetes mellitus in Australia. *Aust N Z J Obstet Gynaecol*. 2016;56:346-8
9. National Institute for Health and Care Excellence. <https://pathways.nice.org.uk/pathways/diabetes-in-pregnancy> 2016 (accessed January 2018).
10. American Diabetes Association. Classification and Diagnosis of Diabetes. *Diabetes Care*. 2016;39 Suppl 1:S13-22
11. Canadian Diabetes Association Clinical Practice Guidelines Expert Committee. Thompson D, Berger H, Feig D, et al. Diabetes and pregnancy. *Can J Diabetes*. 2013;37 Suppl 1:S168-83
12. Laafira A, White SW, Griffin CJ, Graham D. Impact of the new IADPSG gestational diabetes diagnostic criteria on pregnancy outcomes in Western Australia. *Aust N Z J Obstet Gynaecol*. 2016;56:36-41
13. Jiang S, Chippis D, Cheung WN, Mongelli M. Comparison of adverse pregnancy outcomes based on the new IADPSG 2010 gestational diabetes criteria and maternal body mass index. *Aust N Z J Obstet Gynaecol*. 2017;57:533-9
14. Abell SK, Teede HJ. The IADPSG diagnostic criteria identify women with increased risk of adverse pregnancy outcomes in Victoria. *Aust N Z J Obstet Gynaecol*. 2017;57:564-8
15. Dobbins TA, Sullivan EA, Roberts CL, Simpson JM. Australian National Birthweight Percentiles by Sex and Gestational Age, 1998-2007. *MJA*. 2012;197:291-4
16. Diagnostic criteria and classification of hyperglycemia first detected in pregnancy: a World Health Organization Guideline. *Diabetes Res Clin Pract*. 2014;103:341-63
17. Jacklin PB, Maresh MJ, Patterson CC, Stanley KP, Dornhorst A, Burman-Roy S, et al. A cost-effectiveness comparison of the NICE 2015 and WHO 2013 diagnostic criteria for women with gestational diabetes with and without risk factors. *BMJ Open*. 2017;7:e016621

18. Farrar D, Duley L, Dowswell T, Lawlor DA. Different strategies for diagnosing gestational diabetes to improve maternal and infant health. *Cochrane Database Syst Rev.* 2017;8:CD007122
19. Laafira A, White SW, Griffin CJ, Graham D. Impact of the new IADPSG gestational diabetes diagnostic criteria on pregnancy outcomes in Western Australia. *Aust N Z J Obstet Gynaecol.* 2016;56:36-41
20. Jiang S, Chipps D, Cheung WN, Mongelli M. Comparison of adverse pregnancy outcomes based on the new IADPSG 2010 gestational diabetes criteria and maternal body mass index. *Aust N Z J Obstet Gynaecol.* 2017;57:533-9
21. Abell SK, Teede HJ. The IADPSG diagnostic criteria identify women with increased risk of adverse pregnancy outcomes in Victoria. *Aust N Z J Obstet Gynaecol.* 2017;57:564-8

STROBE Statement—Checklist of items that should be included in reports of *cohort studies*

|                              | Item No | Recommendation                                                                                                                                                                                                                                                                                                                                                                                                                                                                                                                                         |
|------------------------------|---------|--------------------------------------------------------------------------------------------------------------------------------------------------------------------------------------------------------------------------------------------------------------------------------------------------------------------------------------------------------------------------------------------------------------------------------------------------------------------------------------------------------------------------------------------------------|
| <b>Title and abstract</b>    | 1       | (a) Indicate the study's design with a commonly used term in the title or the abstract <b>Yes (page 1)</b><br>(b) Provide in the abstract an informative and balanced summary of what was done and what was found <b>Yes (page 2)</b>                                                                                                                                                                                                                                                                                                                  |
| <b>Introduction</b>          |         |                                                                                                                                                                                                                                                                                                                                                                                                                                                                                                                                                        |
| Background/rationale         | 2       | Explain the scientific background and rationale for the investigation being reported <b>Yes (page 3)</b>                                                                                                                                                                                                                                                                                                                                                                                                                                               |
| Objectives                   | 3       | State specific objectives, including any prespecified hypotheses <b>Yes (page 3)</b>                                                                                                                                                                                                                                                                                                                                                                                                                                                                   |
| <b>Methods</b>               |         |                                                                                                                                                                                                                                                                                                                                                                                                                                                                                                                                                        |
| Study design                 | 4       | Present key elements of study design early in the paper <b>Yes (page 3-4)</b>                                                                                                                                                                                                                                                                                                                                                                                                                                                                          |
| Setting                      | 5       | Describe the setting, locations, and relevant dates, including periods of recruitment, exposure, follow-up, and data collection <b>Yes (page 3)</b>                                                                                                                                                                                                                                                                                                                                                                                                    |
| Participants                 | 6       | (a) Give the eligibility criteria, and the sources and methods of selection of participants. Describe methods of follow-up <b>Yes – no exclusion criteria (page 3)</b><br>(b) For matched studies, give matching criteria and number of exposed and unexposed <b>N/A</b>                                                                                                                                                                                                                                                                               |
| Variables                    | 7       | Clearly define all outcomes, exposures, predictors, potential confounders, and effect modifiers. Give diagnostic criteria, if applicable <b>Yes (page 4)</b>                                                                                                                                                                                                                                                                                                                                                                                           |
| Data sources/<br>measurement | 8*      | For each variable of interest, give sources of data and details of methods of assessment (measurement). Describe comparability of assessment methods if there is more than one group <b>Yes (page 4)</b>                                                                                                                                                                                                                                                                                                                                               |
| Bias                         | 9       | Describe any efforts to address potential sources of bias <b>Yes (page 4 and 7)</b>                                                                                                                                                                                                                                                                                                                                                                                                                                                                    |
| Study size                   | 10      | Explain how the study size was arrived at <b>Yes (entire cohort, page 4)</b>                                                                                                                                                                                                                                                                                                                                                                                                                                                                           |
| Quantitative variables       | 11      | Explain how quantitative variables were handled in the analyses. If applicable, describe which groupings were chosen and why <b>Yes (page 4)</b>                                                                                                                                                                                                                                                                                                                                                                                                       |
| Statistical methods          | 12      | (a) Describe all statistical methods, including those used to control for confounding <b>Yes, confounding not particularly relevant as outcomes were examined across whole cohorts (page 4-5)</b><br>(b) Describe any methods used to examine subgroups and interactions <b>N/A (no subgroups)</b><br>(c) Explain how missing data were addressed <b>N/A (nil was missing)</b><br>(d) If applicable, explain how loss to follow-up was addressed <b>N/A (nil lost to follow-up)</b><br>(e) Describe any sensitivity analyses <b>N/A (not required)</b> |
| <b>Results</b>               |         |                                                                                                                                                                                                                                                                                                                                                                                                                                                                                                                                                        |
| Participants                 | 13*     | (a) Report numbers of individuals at each stage of study—eg numbers potentially eligible, examined for eligibility, confirmed eligible, included in the study, completing follow-up, and analysed <b>Yes (page 5)</b><br>(b) Give reasons for non-participation at each stage <b>N/A (retrospective analysis with no possibility for non-participation)</b><br>(c) Consider use of a flow diagram <b>Not used</b>                                                                                                                                      |
| Descriptive data             | 14*     | (a) Give characteristics of study participants (eg demographic, clinical, social) and information on exposures and potential confounders <b>Yes (page 5 and Table 2)</b><br>(b) Indicate number of participants with missing data for each variable of interest <b>Nil missing</b>                                                                                                                                                                                                                                                                     |

|                          |     |                                                                                                                                                                                                                                                                                                                                                                                                                                                                       |
|--------------------------|-----|-----------------------------------------------------------------------------------------------------------------------------------------------------------------------------------------------------------------------------------------------------------------------------------------------------------------------------------------------------------------------------------------------------------------------------------------------------------------------|
|                          |     | (c) Summarise follow-up time (eg, average and total amount) <b>N/A (examined at time of delivery – no long-term follow up)</b>                                                                                                                                                                                                                                                                                                                                        |
| Outcome data             | 15* | Report numbers of outcome events or summary measures over time <b>Yes (page 5-6)</b>                                                                                                                                                                                                                                                                                                                                                                                  |
| Main results             | 16  | (a) Give unadjusted estimates and, if applicable, confounder-adjusted estimates and their precision (eg, 95% confidence interval). Make clear which confounders were adjusted for and why they were included <b>Yes (page 5-6, tables 3-4)</b><br>(b) Report category boundaries when continuous variables were categorized <b>N/A</b><br>(c) If relevant, consider translating estimates of relative risk into absolute risk for a meaningful time period <b>N/A</b> |
| Other analyses           | 17  | Report other analyses done—eg analyses of subgroups and interactions, and sensitivity analyses <b>N/A</b>                                                                                                                                                                                                                                                                                                                                                             |
| <b>Discussion</b>        |     |                                                                                                                                                                                                                                                                                                                                                                                                                                                                       |
| Key results              | 18  | Summarise key results with reference to study objectives <b>Yes (page 6-7)</b>                                                                                                                                                                                                                                                                                                                                                                                        |
| Limitations              | 19  | Discuss limitations of the study, taking into account sources of potential bias or imprecision. Discuss both direction and magnitude of any potential bias <b>Yes (page 7)</b>                                                                                                                                                                                                                                                                                        |
| Interpretation           | 20  | Give a cautious overall interpretation of results considering objectives, limitations, multiplicity of analyses, results from similar studies, and other relevant evidence <b>Yes (page 7-8)</b>                                                                                                                                                                                                                                                                      |
| Generalisability         | 21  | Discuss the generalisability (external validity) of the study results <b>Yes (page 8)</b>                                                                                                                                                                                                                                                                                                                                                                             |
| <b>Other information</b> |     |                                                                                                                                                                                                                                                                                                                                                                                                                                                                       |
| Funding                  | 22  | Give the source of funding and the role of the funders for the present study and, if applicable, for the original study on which the present article is based <b>Yes (page 8)</b>                                                                                                                                                                                                                                                                                     |

\*Give information separately for exposed and unexposed groups.

**Note:** An Explanation and Elaboration article discusses each checklist item and gives methodological background and published examples of transparent reporting. The STROBE checklist is best used in conjunction with this article (freely available on the Web sites of PLoS Medicine at <http://www.plosmedicine.org/>, Annals of Internal Medicine at <http://www.annals.org/>, and Epidemiology at <http://www.epidem.com/>). Information on the STROBE Initiative is available at <http://www.strobe-statement.org>.

# BMJ Open

## Implications of the introduction of new criteria for the diagnosis of gestational diabetes: a health outcome and economic analysis

|                                 |                                                                                                                                                                                                                                                                                                                                                                             |
|---------------------------------|-----------------------------------------------------------------------------------------------------------------------------------------------------------------------------------------------------------------------------------------------------------------------------------------------------------------------------------------------------------------------------|
| Journal:                        | <i>BMJ Open</i>                                                                                                                                                                                                                                                                                                                                                             |
| Manuscript ID                   | bmjopen-2018-023293.R1                                                                                                                                                                                                                                                                                                                                                      |
| Article Type:                   | Research                                                                                                                                                                                                                                                                                                                                                                    |
| Date Submitted by the Author:   | 25-Apr-2018                                                                                                                                                                                                                                                                                                                                                                 |
| Complete List of Authors:       | Cade, Thomas; Royal Women's Hospital, Pregnancy Research Centre; University of Melbourne, Obstetrics and Gynaecology<br>Polyakov, Alexander; Royal Women's Hospital, Reproductive Services; University of Melbourne, Obstetrics and Gynaecology<br>Brennecke, Shaun; Royal Women's Hospital, Pregnancy Research Centre; University of Melbourne, Obstetrics and Gynaecology |
| <b>Primary Subject Heading</b>: | Obstetrics and gynaecology                                                                                                                                                                                                                                                                                                                                                  |
| Secondary Subject Heading:      | Diabetes and endocrinology                                                                                                                                                                                                                                                                                                                                                  |
| Keywords:                       | OBSTETRICS, Maternal medicine < OBSTETRICS, Fetal medicine < OBSTETRICS                                                                                                                                                                                                                                                                                                     |
|                                 |                                                                                                                                                                                                                                                                                                                                                                             |

SCHOLARONE™  
Manuscripts

Only

# Implications of the introduction of new criteria for the diagnosis of gestational diabetes: a health outcome and economic analysis

Thomas J Cade<sup>1,2,3</sup>

Alexander Polyakov<sup>3,4</sup>

Shaun P Brennecke<sup>2,3</sup>

1. Diabetes Service, Royal Women's Hospital, Parkville, Victoria, Australia
2. Pregnancy Research Service, Department of Maternal Fetal Medicine, Royal Women's Hospital, Parkville, Victoria, Australia
3. Department of Obstetrics and Gynaecology, University of Melbourne, Parkville, Victoria, Australia
4. Department of Reproductive Biology, Royal Women's Hospital, Parkville, Victoria, Australia

Corresponding author: Dr Thomas Cade, Royal Women's Hospital, 20 Flemington Rd, Parkville, 3052, Australia.  
Email: [tom.cade@thewomens.org.au](mailto:tom.cade@thewomens.org.au) telephone +61 3 83452000

Word Count: 2719

## Abstract

### *Objective*

To identify effects on health outcomes from implementing new criteria diagnosing gestational diabetes (GDM) and to analyse costs-of-care associated with this change.

### *Design*

Large retrospective cohort study comparing data from the calendar year before (2014) and after (2016) the change.

### *Setting*

Single, tertiary level, university-affiliated, maternity hospital.

### *Participants*

All women giving birth in the hospital, excluding those with pre-existing diabetes or multiple pregnancy.

### *Main outcome measures*

Primary outcomes were caesarean section, birthweight > 90<sup>th</sup> percentile for gestation, hypertensive disorder of pregnancy and pre-term birth less than 37 weeks. A number of secondary outcomes reported to be associated with GDM were also analysed were also analysed.

Care packages were derived for those without GDM, diet-controlled GDM and GDM requiring insulin. The Institutional Business Reporting Unit data for average occasions of service, pharmacy schedule for the costs of consumables and medications, and Medicare Benefits Schedule ultrasound services were used for costing each package. All costs were estimated in figures from the end of 2016 negating the need to adjust for Consumer Price Index increases.

### *Results*

There was an increase in annual incidence of GDM of 74% without overall improvements in primary health outcomes. This incurred a gross cost increase of \$904 178 and net of \$560 093. Babies of women with GDM had lower rates of neonatal hypoglycaemia and special care nursery admissions after the change, suggesting a milder spectrum of disease.

### *Conclusion*

New criteria for the diagnosis of GDM have not resulted in significant improvements in key health outcomes in a large tertiary maternity hospital but have significantly increased the incidence of GDM and the overall cost of GDM care.

### Strengths and limitations of this study

- Australia is one of the only major Western countries to introduce universal screening for GDM by new International Association of Diabetes in Pregnancy Study Group criteria and is uniquely poised to assess concerns about increased annual incidence and costs of care compared to any potential improvement in health outcomes.
- Concerns about an increase in diagnoses and “over-medicalisation” of women who erstwhile would have been considered normal have given many countries reason for caution in adopting the new criteria: our findings may assist in decision making regarding this public health policy.
- As with any large retrospective audit, there are potential methodological flaws in data analysis, however we have assessed the implication of adopting this criteria on an entire cohort (not a specific subgroup) minimising the risks of selection bias.
- A major problem with assessing changes in diagnostic criteria in GDM lies within being unable to retrospectively identify those who were potentially underdiagnosed under older systems and assess their outcomes. We have thus assessed the impact on a large tertiary hospital as a whole and quantified the costs associated with the increased burden or care.

## Introduction

Diagnostic criteria for gestational diabetes (GDM) in Australia changed following a 2014 consensus statement by the Australian Diabetes in Pregnancy Society (ADIPS)<sup>1</sup> ratifying support for the International Association of Diabetes in Pregnancy Study Group's recommendations<sup>2</sup> (see table 1). These, in turn, used data from the Hyperglycaemia and Adverse Pregnancy Outcome (HAPO) trial,<sup>3</sup> which was a large, prospective, multi-centre study examining the influence of increasing blood glucose levels on a fasting glucose tolerance test on eventual adverse pregnancy outcome.

Previously, diagnostic criteria for GDM in Australia were derived from an earlier ADIPS consensus statement published in 1991<sup>4</sup> and re-endorsed in 1998<sup>5</sup> (see Table 1). It was based on the observed distributions of blood glucose levels tested in pregnant women at various maternity centres. These older criteria had been widely utilised for the last two decades in many Australian maternity centres including our own.

(Table 1 goes about here).

Since the introduction of the new criteria, concerns have focussed on the anticipated increase in annual incidence of GDM that these new criteria will cause and the resultant implications for workload. Early estimates of an annual increase of 35%<sup>6</sup> were followed by later data suggesting an almost doubling in some populations.<sup>7</sup> Although many major maternity centres in Australia have adopted the new criteria, a 2016 survey found variable adoption in Australia<sup>8</sup> and the criteria have not yet found international acceptance despite WHO endorsement.<sup>9, 10, 11</sup>

While it was never the intention of the HAPO authors to suggest a specific annual incidence for GDM, it is important to remember that the new criteria and the suggested relative risk reductions were derived from an untreated population. They were not derived from comparing the new criteria to any other existing methods of diagnosis. While the change may be important for uniformity in diagnosis and may result in clinically important outcomes in individuals previously not diagnosed with GDM, it is also important to assess whether any improvements are seen across large populations and, if so, whether they justify any increase in costs-of-care.

We aimed to estimate the impact of this change in a large tertiary maternity hospital by examining an entire cohort of pregnant women immediately before and immediately after the new criteria were adopted. Specifically, we wished to examine the increase in annual incidence of GDM, assign an appropriate cost-of-care to the high-risk model employed for GDM and compare this to any hospital-wide change in the HAPO outcomes upon which the new criteria are based.

## Patients and Methods

As the new criteria for diagnosing GDM were introduced in our hospital in mid 2015, we selected 2014 as the last full calendar year of diagnosis under 1991/1998 ADIPS criteria<sup>4,5</sup> and 2016 as the first full year of diagnosis under the new IADPSG criteria.<sup>2</sup> All women having care and delivering within the hospital were included for analysis, with exclusion limited

1  
2  
3 only to pre-existing diabetes (i.e. those who did not undergo screening for GDM) and  
4 multiple pregnancy (an exclusion criterion in the HAPO trial). Women in Australia have  
5 universal screening for GDM between 24 and 28 weeks.  
6

7  
8 Clinical care during the periods of study was divided into three groups: those without GDM,  
9 GDM managed with dietary measures, and GDM requiring insulin. For occasions of clinical  
10 review, such as antenatal clinic consultations, group class and phone-call consultations, and  
11 pregnancy day care admissions, cost was estimated from “average occasion of service”  
12 figures for the relevant health professional, as collected by the institutional Business  
13 Performance Reporting Unit. The pharmacy schedule was consulted for the costs of  
14 consumables and medications. The Medicare Benefits Schedule was considered the most  
15 reproducible and valid estimation for the cost of ultrasound services. All costs were  
16 estimated in figures from the end of 2016, thus negating the need to adjust 2014 figures for  
17 consumer price index (CPI) or other potential inflationary changes.  
18

19  
20 Women diagnosed with GDM receive a three-hour group class with a diabetes educator,  
21 dietician and physiotherapist. In addition, most have a follow-up one-on-one session with a  
22 dietician, phone consultations with diabetes educators, two extra antenatal clinics,  
23 assessment by consultant obstetricians rather than by midwives or junior medical staff, and  
24 a growth ultrasound. They also require a glucometer and testing strips.  
25

26  
27 If dietary measures fail to control blood glucose levels (BGLs) at acceptable levels, they also  
28 require insulin, a one-on-one session with a diabetes educator, an extra antenatal clinic,  
29 often a second growth scan and sometimes fetal heart rate monitoring via cardiotocography  
30 (CTG).  
31

32  
33 Demographic data were collected for each group, including age, body mass index (BMI), pre-  
34 existing polycystic ovarian syndrome (PCOS), smoking, parity and previous caesarean  
35 section (LUSCS).  
36

37  
38 Primary outcomes were those upon which the new criteria were based, namely caesarean  
39 section rates, hypertensive disorder of pregnancy, birthweight greater than the 90<sup>th</sup>  
40 percentile, pre-term birth less than 37 weeks.<sup>2</sup>  
41

42  
43 Additional maternal outcomes were induction of labour, instrumental birth, third degree  
44 tear and post-partum haemorrhage. Additional fetal outcomes were greater than the 95<sup>th</sup>  
45 percentile, less than the 10<sup>th</sup> percentile, admission to special care nursery (SCN) or neonatal  
46 intensive care (NICU), estimated gestational age, pre-term birth less than 34 weeks,  
47 respiratory distress, jaundice requiring phototherapy, hypoglycaemia, stillbirth, neonatal  
48 death, and Apgar score less than 7 at 5 minutes. Birth trauma was initially included as an  
49 outcome but subsequently removed due to a change in coding practices midway through  
50 the study period which artificially lowered overall recorded rates.  
51

52  
53 Neonatal birthweights were plotted by percentile as described by the latest Australian birth  
54 charts.<sup>12</sup> Neonatal hypoglycaemia was defined as any ward-measured BGL less than 2.6  
55 mmol/L.  
56  
57  
58  
59

1  
2  
3 Maternal and neonatal outcomes were examined for the entire hospital cohort (to examine  
4 the change as a public health policy) and for just women diagnosed with GDM in 2014  
5 (before the change) compared to those in 2016 (after the change).  
6

7  
8 Data were collected prospectively by the institutional Quality and Safety Unit from the  
9 Maternity Care Information System ("MCIS", GE Healthcare, Little Chalfont, UK) and  
10 collated in MS Excel spreadsheets (Microsoft, Redmond, USA). Data were analysed after  
11 selecting the demographics and outcomes of interest. Maternal and neonatal  
12 characteristics were compared using descriptive statistics. Discrete variables are reported in  
13 the tables as total numbers with percentage in parentheses and continuous variables are  
14 reported as the mean with 95% confidence intervals in parentheses. For univariate analyses,  
15 discrete variables were analysed using Fisher's exact test or Pearson's chi-squared test and  
16 continuous variables using Student's t-test. Multivariate analysis with logistic regression was  
17 planned for any outcome which met statistical and clinical significance and had documented  
18 risk factors other than GDM. P-values are reported in the final column of all tables with less  
19 than 0.05 considered statistically significant and highlighted in bold. Statistical analysis was  
20 performed using STATA 9.2 (StataCorp, Texas, USA).  
21  
22

23  
24 The study was approved as an anonymised audit by the Institutional Research and Ethics  
25 Committee with identifying information removed before analysis.  
26

### 27 *Patient and Public Involvement*

28  
29 This was an anonymised retrospective audit, thus patients and the public were not required  
30 to be directly involved in recruitment or conduct of the study. Indeed, emphasis was given  
31 toward assessing the implications of this public health policy on a patient cohort as a whole  
32 rather than subgroup or individual outcomes.  
33  
34

## 35 **Results**

### 36 *Demographics and Health Outcomes*

37  
38 In 2014, there were 7010 pregnant women of whom 416 were diagnosed with GDM  
39 (incidence 5.93%) and in 2016, there were 7488 pregnant women of whom 774 were  
40 diagnosed with GDM (incidence 10.3%). The demographics of the two cohorts are shown in  
41 Table 2.  
42  
43

44  
45 (Table 2 goes about here).  
46

47  
48 Although the second cohort was statistically significantly older, this was only by a mean of  
49 four months. The diagnosis of PCOS was higher but overall rates were low and possibly  
50 under-reported. These two findings were statistically significant but unlikely to be clinically  
51 relevant. The relative increase of 73.7% in the annual incidence of GDM is most likely  
52 attributable to the change in diagnosis rather than to any changed demographic factors.  
53

54  
55 The maternal outcomes for the entire cohort are shown in Table 3 and the fetal outcomes in  
56 Table 4, with the HAPO/IADPSG outcomes highlighted in bold.  
57

58 (Tables 3 and 4 go about here).  
59

1  
2  
3  
4 Following the introduction of the new GDM criteria, there has not been a hospital-wide  
5 decrease in the main outcomes reported in the sub-analysis of the HAPO trial, most  
6 particularly in birthweight >90<sup>th</sup> percentile for gestation, caesarean section, hypertensive  
7 disorder of pregnancy or pre-term birth <37 weeks. However, there has been a hospital-  
8 wide decrease in neonatal death and birthweight greater than the 95<sup>th</sup> percentile in the  
9 fetal outcomes and an increase in induction of labour and instrumental birth in the maternal  
10 outcomes. The decrease in neonatal death rates was unexplained, almost always occurs at  
11 the extreme of prematurity and the absolute difference was low at 0.2%. The change most  
12 likely attributable to tightening GDM diagnoses is a small reduction in very large babies.  
13  
14

15 The maternal and fetal outcomes for the women with GDM are shown in Tables 5 and 6  
16 respectively. There was a reduction in the annual incidence of third degree tears from 5.29%  
17 to 2.58% in the mothers with GDM. There was also a reduction in the incidence of neonatal  
18 hypoglycaemia (from 9.62% to 5.94%) and admissions to special care nursery (from 12.5% to  
19 7.75%).  
20  
21

22 (Tables 5 and 6 go about here)  
23  
24

#### 25 *Costs of care*

26  
27 The average antenatal care package for women without GDM costs \$923 and for the 15%  
28 that require post-dates care this is \$1742 (when extra clinics, and CTG and amniotic fluid  
29 monitoring are required). The care package for women with GDM who do not need insulin is  
30 \$2026 and for those that do need insulin is \$2534 (or \$3826 if CTG monitoring from 36  
31 weeks is undertaken: on audit during the study period, this occurred in 50% of patients).  
32  
33

34 In 2014, 210 women with GDM were controlled with dietary measures and 206 required  
35 insulin. The costs of care for GDM was calculated as follows:  
36

37 GDM diet controlled:  $210 \times \$2026 = \$425\ 460$

38 GDM insulin controlled:  $0.5 \times 206 \times \$2534 + 0.5 \times 206 \times \$3826 = \$655\ 080$

39 **Total = \$1 080 540**  
40  
41

42 In 2016, 413 women with GDM were controlled with dietary measures and 361 required  
43 insulin. The costs of care for GDM was calculated as follows:  
44

45 GDM diet controlled:  $413 \times \$2026 = \$836\ 738$

46 GDM insulin controlled:  $0.5 \times 361 \times \$2534 + 0.5 \times 361 \times \$3826 = \$1\ 147\ 980$

47 **Total = \$1 984 718**  
48  
49

50 The gross cost increase for care of women with GDM was thus \$904 178. The net cost  
51 increase can be determined by attributing the cost of standard care to the excess diagnoses  
52 of GDM. If we round the incidence of GDM in 2014 up to 6% and use this with the total  
53 number of deliveries in 2016 ( $n=7420$ ), the approximate number of women diagnosed with  
54 GDM if the criteria did not change would have been:  $0.06 \times 7420 = 445$ . The approximate  
55 excess number of cases of GDM is the total in 2016 ( $n = 774$ ) minus this figure ( $n = 445$ )  
56 which is:  $774 - 445 = 329$ . We can then apply this number to routine care (bearing in  
57 mind 15% of those undergoing routine care require post-dates monitoring) as follows:  
58  
59

$$0.85 \times 329 \times \$923 + 0.15 \times 329 \times \$1742 = \$344\,085$$

The net cost increase is then the gross cost increase minus this figure:

$$\$904\,178 - \$344\,085 = \$560\,093$$

The hospital has thus spent a gross of **\$904 178** or a net of **\$560 093** caring for women with GDM because of the change in criteria.

## Discussion

The HAPO trial<sup>3</sup> was a landmark study for several reasons, namely its sheer size (over 25 000 pregnant women), its robust statistical methods, and its aim to unify disparate international views about the significance of GDM and the best way to diagnose it. The IADPSG sub-analysis<sup>2</sup> used important clinical outcomes in identifying a “best-fit” for cut-off values within the 75-gram glucose tolerance test (GTT) to diagnose GDM: most are routinely measured in clinical care (with the exception of cord C-peptide and fetal fat distribution). The resulting recommendation was for a 75-gram GTT for all women (regardless of baseline risk) with levels of greater than 5.1 mmol/L at fasting, 10 mmol/L at one-hour and 8.5 mmol/L at two-hours considered diagnostic.

Despite a WHO statement endorsing the new criteria,<sup>13</sup> there has been a failure of international acceptance to screen for GDM in this way. The National Institute of Clinical Excellence which guides care in the United Kingdom is perhaps the most striking example, recommending only screening those patients with risk factors and using levels of greater than or equal to 5.6 mmol/L at fasting and 7.8 mmol/L at two-hours.<sup>9</sup> A sophisticated economic evaluation found this approach to be superior in their population<sup>14</sup>, and an earlier economic evaluation found that it was not currently cost-effective to routinely identify pregnant women for hyperglycaemia<sup>15</sup>. This latter also suggested further research into longer term health-outcomes of women and babies affected by GDM and more cost-effective ways of treating GDM, a sentiment reiterated by the findings of our manuscript.

Economic evaluations in American populations have also tended to favour existing screening criteria<sup>16,17,18</sup>, albeit with less robust methodology and with different existing screening methods to both the UK and Australia. The latest Cochrane review concluded that there is insufficient evidence to prefer any particular screening method for GDM over another.<sup>19</sup>

The new criteria were a major change to established practice in Australia. The abolition of the non-fasting glucose challenge test (GCT) and the introduction of the one-hour BGL on the GTT were both new. The fasting BGL was tightened from greater than or equal to 5.5 mmol/L to 5.1 mmol/L and the two-hour level eased from greater than or equal to 8.0 mmol/L to 8.5 mmol/L. Some studies have tried to examine outcomes in patients who may have been diagnosed with GDM under the new system but not under the old.<sup>20,21,22</sup> Generally, they have reported groups at higher risk of adverse outcome (particularly caesarean section and large babies) who may have been previously underdiagnosed, but such an approach is flawed because of the abolition of the glucose challenge test and the introduction of the previously untested one-hour BGL. It thus is not possible to retrospectively examine the outcomes of those who may have had a false negative on the GCT or those who may have only tested positive on the new one-hour level.

1  
2  
3  
4 A separate approach, one adopted by this study, is to quantify any overall changes in clinical  
5 outcomes and attribute a cost to the increased burden of care and a saving to any potential  
6 outcome improvements.  
7

8  
9 The strengths of this study include using a single, large, tertiary centre with a uniform urban  
10 catchment area and relatively stable demographics over the study period. The numbers  
11 were large with over 7000 births per year in each cohort, and the costs of care were  
12 quantifiable by an established institutional Business Performance Reporting Unit. Outcomes  
13 were readily identified from existing data management systems and were usually  
14 categorical (often binary) and not requiring extensive further investigation or statistical  
15 analysis. The weaknesses of the study are those always inherent within retrospective data,  
16 including the potential for treatment or ascertainment bias. However, as the outcomes of  
17 the entire cohort (rather than just those diagnosed with GDM were analysed) this was likely  
18 to be minimised. The latter point is important as the aim of the study was to estimate a  
19 public health impact overall, as a result of a public health policy change.  
20  
21

22 We demonstrated a relative increased incidence of GDM of 74%, but we were unable to  
23 demonstrate any statistically significant improvements in major outcomes across the  
24 hospital as a whole. There was possibly a small improvement in the incidence of very large  
25 babies (greater than the 95<sup>th</sup> percentile) but the absolute changes were small (0.7%) and  
26 there was no change in babies greater than the 90<sup>th</sup> percentile. An apparent improvement  
27 in birth trauma was due to a change in coding practices (and removed as an outcome), and  
28 an improvement in the neonatal death rate was unexplained but very low in absolute terms  
29 (0.2%). This latter tended to be confined to babies of extreme prematurity born well before  
30 routine screening for GDM.  
31  
32

33  
34 It is reasonable to hypothesise that, with such minimal overall hospital-wide changes, that it  
35 is simply a lower-risk cohort being now diagnosed with GDM. This is somewhat, but not  
36 completely, borne out by analysing the same outcomes in women with GDM before and  
37 after the change. While major outcomes such as caesarean section rates, hypertensive  
38 disorders, pre-term birth and macrosomia have not changed, there has been a reduction in  
39 third degree tears and a substantial decrease in the number of babies diagnosed with  
40 hypoglycaemia and admitted to SCN. This is suggestive of an increase in diagnoses  
41 represented by women on the milder end of the spectrum of GDM.  
42  
43

44 We have also demonstrated an increase in gross costs of over A\$900 000 and in net costs of  
45 over A\$500 000 per annum. This is primarily due to employing a “high-risk” model of care to  
46 all women with GDM.  
47  
48

49 While the new criteria are laudable in their efforts at uniformity of diagnosis and adverse  
50 outcome avoidance, and possibly have improved clinical outcomes in sub-groups of women  
51 previously not diagnosed with GDM, there is lack of quality evidence supporting their  
52 superiority over other systems of diagnosis. Thus, further research is needed in three main  
53 areas. Firstly, it would be desirable to have prospective (and ideally randomised controlled  
54 trial) evidence examining the impact of this system of diagnosis over others employed  
55 around the world. Secondly, long-term outcomes of the women with GDM and their  
56 children may uncover health benefits not accounted for in immediate analyses like those  
57 presented in this study, for instance with improvements in childhood obesity rates. There  
58  
59

1  
2  
3 may indeed be economic benefits that can be compared with the initial increase in costs of  
4 care but appropriate budgetary measures to ensure the initial hospitals of care are  
5 adequately reimbursed are essential. Finally, it is important to investigate more economic  
6 ways of antenatally managing women with GDM particularly in the lower risk group, for  
7 example those easily controlled with simple dietary measures or the increasing use of  
8 metformin in those currently being prescribed insulin.  
9

## 10 **Conclusion**

11  
12  
13 The annual incidence of GDM has immediately and markedly increased due to the change in  
14 diagnostic criteria with a substantial increase in cost of care and with no overall  
15 improvement in immediate clinical outcomes. Most particularly, macrosomia rates (>90<sup>th</sup>%),  
16 caesarean section rates and pre-term birth less than 37 weeks remain unchanged. We  
17 suggest that these results tell a cautionary tale about the routine adoption of even  
18 internationally endorsed clinical guidelines which have not been validated by rigorous  
19 randomized studies. In the present case, countries like the UK which chose not to adopt the  
20 new criteria for diagnosing GDM may have saved considerable resources without short-term  
21 clinical detriment. On the other hand, countries like Australia which adopted these new  
22 criteria in good faith have incurred considerable extra costs without proven commensurate  
23 clinical improvement. Further validation of long-term outcomes such as childhood obesity  
24 rates are important to assist with the justification of adopting the new criteria and lower  
25 risk models-of-care would make the economic case more robust.  
26  
27  
28  
29

## 30 **Declaration of Interests**

31  
32  
33 There were no conflicts of interest with regards to any of the three authors.  
34

## 35 **Contributor and guarantor information**

36 The corresponding author (TC) was responsible for the study design, literature review,  
37 collection and analysis of data, interpretation of clinical findings, writing of the manuscript  
38 and decision for submission. TC is responsible for the overall content and acts as guarantor.  
39 SB supervised the project and contributed to all of the above in a consulting role. AP  
40 contributed to planning and executing appropriate statistical analysis and with  
41 interpretation of the data. All authors contributed to the final manuscript review and final  
42 submission.  
43  
44

## 45 **Data Sharing Statement**

46  
47  
48 There are no unpublished data from the study.  
49  
50  
51  
52  
53  
54  
55  
56  
57  
58  
59  
60

### **Role of the funding source**

The Royal Australian and New Zealand College of Obstetrics and Gynaecology, who awarded the Luke Proposch Perinatal Research Scholarship to the corresponding author to financially support this research, had no role in the study design, data collection, analysis and interpretation, writing of the report or decision to submit for publication. The corresponding author had full access to the data in the study and final responsibility for the decision to submit for publication.

### **Transparency Declaration**

The corresponding author (TC) affirms that the manuscript is an honest, accurate, and transparent account of the study being reported and that no important aspects of the study have been omitted.

## Tables

Table 1 1991/1998 ADIPS versus 2014 IADPSG Criteria for diagnosing GDM

|                        | 1991/1998 ADIPS                                                                               |                                               | 2014 IADPSG                                               |                                                                | 2015 NICE                                               |                                                    |
|------------------------|-----------------------------------------------------------------------------------------------|-----------------------------------------------|-----------------------------------------------------------|----------------------------------------------------------------|---------------------------------------------------------|----------------------------------------------------|
|                        | Type of test                                                                                  | Positive criteria                             | Type of test                                              | Positive criteria                                              | Type of test                                            | Positive criteria                                  |
| <b>Screening test</b>  | 50g non-fasting glucose challenge test<br><b>or</b><br>75g non-fasting glucose challenge test | ≥ 7.8mmol/L<br><br>≥ 8.0mmol/L                | Nil                                                       | N/A                                                            | Clinical risk assessment                                | Any one of five clinical risk factors <sup>9</sup> |
| <b>Diagnostic test</b> | 75g, 2-hour fasting glucose tolerance test (two levels)                                       | Fasting ≥ 5.5mmol/L<br><br>2 hour ≥ 8.0mmol/L | 75g, 2-hour fasting glucose tolerance test (three levels) | Fasting ≥ 5.1mmol/L<br>1 hour ≥ 10mmol/L<br>2 hour ≥ 8.5mmol/L | 75g, 2-hour fasting glucose tolerance test (two levels) | Fasting ≥ 5.6mmol/L<br><br>2 hour ≥ 7.8mmol/L      |

Table 2 Demographics of the 2014 and 2016 cohorts

|                          | 2014               | 2016               | p-value       |
|--------------------------|--------------------|--------------------|---------------|
| Total Deliveries         | 7010               | 7488               | n/a           |
| Age (yr)                 | 30.9 (30.8 – 31.0) | 31.2 (31.1 – 31.3) | <b>0.0016</b> |
| BMI (kg.m <sup>2</sup> ) | 24.8 (24.7 – 24.9) | 24.7 (24.6 – 24.8) | 0.28          |
| PCOS                     | 110 (1.57%)        | 151 (2.02%)        | <b>0.043</b>  |
| Smoking                  | 326 (4.65%)        | 303 (4.05%)        | 0.075         |
| Parity ≥ 1               | 3228 (46.1%)       | 3365 (44.9%)       | 0.18          |
| Previous LUSCS           | 960 (13.7%)        | 1027 (13.7%)       | 0.45          |

Table 3 Overall Maternal Outcomes in 2014 and 2016

|                              | 2014         | 2016         | p-value     |
|------------------------------|--------------|--------------|-------------|
| <b>Hypertensive disorder</b> | 332 (4.74%)  | 361 (4.82%)  | 0.81        |
| Induction of labour          | 2407 (34.3%) | 2725 (36.4%) | <b>0.01</b> |
| <b>Overall LUSCS rate</b>    | 1963 (28.0%) | 2070 (27.6%) | 0.63        |
| Emergency LUSCS rate         | 1088 (15.5%) | 1076 (14.3%) | 0.05        |
| Instrumental birth           | 1316 (18.8%) | 1513 (20.2%) | <b>0.03</b> |
| Third degree tear            | 217 (3.1%)   | 197 (2.6%)   | 0.09        |
| PPH                          | 1685 (24.0%) | 1765 (23.6%) | 0.51        |

Table 4 Overall Fetal Outcomes in 2014 and 2016

|                                    | 2014               | 2016               | p-value     |
|------------------------------------|--------------------|--------------------|-------------|
| EGA                                | 38.6 (38.6 – 38.7) | 38.6 (38.5 – 38.6) | 0.18        |
| Stillbirth                         | 36 (0.51%)         | 40 (0.53%)         | 0.86        |
| NND                                | 29 (0.41%)         | 16 (0.21%)         | <b>0.03</b> |
| Hypoglycaemia                      | 154 (2.20%)        | 170 (2.27%)        | 0.77        |
| Respiratory distress               | 140 (2.00%)        | 170 (2.27%)        | 0.26        |
| Jaundice<br>requiring phototherapy | 112 (1.60%)        | 135 (1.80%)        | 0.34        |
| Apgar < 7 at 5 min                 | 280 (3.99%)        | 286 (3.82%)        | 0.59        |
| <b>Birth &lt; 37 weeks</b>         | 645 (9.20%)        | 671 (8.96%)        | 0.62        |
| Birth < 34 weeks                   | 292 (4.17%)        | 325 (4.34%)        | 0.61        |
| Shoulder dystocia                  | 102 (1.46%)        | 131 (1.75%)        | 0.16        |
| Admission to NICU                  | 320 (4.56%)        | 366 (4.89%)        | 0.36        |
| Admission to SCN                   | 534 (7.62%)        | 537 (7.17%)        | 0.31        |
| <b>Birthweight (g)</b>             | 3289 (3274 – 3304) | 3275 (3271 – 3293) | 0.21        |
| Birthweight > 95%                  | 300 (4.31%)        | 269 (3.61%)        | <b>0.03</b> |
| <b>Birthweight &gt; 90%</b>        | 577 (8.28%)        | 586 (7.86%)        | 0.36        |
| Birthweight < 10%                  | 570 (8.18%)        | 616 (8.27%)        | 0.85        |
|                                    |                    |                    |             |

*Table 5 Maternal Outcomes of Women with GDM in 2014 compared to 2016*

|                       | <b>2014</b> | <b>2016</b> | <b>p-value</b> |
|-----------------------|-------------|-------------|----------------|
| Total                 | 416         | 774         | N/A            |
| Hypertensive disorder | 20 (4.80%)  | 35 (4.52%)  | 0.85           |
| Induction of labour   | 204 (49.0%) | 379 (49.0%) | 0.98           |
| Overall LUSCS rate    | 162 (38.9%) | 289 (37.3%) | 0.59           |
| Emergency LUSCS rate  | 71 (17.1%)  | 121 (15.6%) | 0.52           |
| Instrumental birth    | 83 (20.0%)  | 134 (17.3%) | 0.26           |
| Third degree tear     | 22 (5.29%)  | 20 (2.58%)  | <b>0.016</b>   |
| PPH                   | 121 (29.1%) | 205 (26.5%) | 0.34           |

*Table 6 Fetal Outcomes of Women with GDM in 2014 compared to 2016*

|                                 | <b>2014</b>        | <b>2016</b>        | <b>p-value</b> |
|---------------------------------|--------------------|--------------------|----------------|
| EGA                             | 37.8 (37.6 – 38.1) | 38.0 (37.9 – 38.2) | 0.13           |
| Stillbirth                      | 5 (1.20%)          | 3 (0.39%)          | 0.10           |
| NND                             | 0.00%              | 1 (0.13%)          | N/A            |
| Hypoglycaemia                   | 40 (9.62%)         | 46 (5.94%)         | <b>0.02</b>    |
| Respiratory distress            | 11 (2.64%)         | 12 (1.55%)         | 0.19           |
| Jaundice requiring phototherapy | 9 (2.16%)          | 12 (1.55)          | 0.44           |
| Apgar < 7 at 5 mins             | 19 (4.57%)         | 26 (3.36%)         | 0.30           |
| Birth < 37 weeks                | 51 (12.3%)         | 83 (10.7%)         | 0.42           |
| Birth < 34 weeks                | 25 (6.01%)         | 30 (3.88%)         | 0.10           |
| Shoulder dystocia               | 7 (1.68%)          | 5 (0.65%)          | 0.09           |
| Admission to NICU               | 27 (6.49%)         | 39 (5.04%)         | 0.30           |
| Admission to SCN                | 52 (12.5%)         | 60 (7.75%)         | <b>0.007</b>   |
| Birthweight                     | 3151 (3089 – 3213) | 3207 (3167 – 3248) | 0.12           |
| Birthweight > 95%               | 27 (6.49%)         | 35 (4.52%)         | 0.15           |
| Birthweight > 90%               | 48 (11.5%)         | 74 (9.56%)         | 0.28           |
| Birthweight < 10%               | 38 (9.13%)         | 60 (7.75%)         | 0.41           |

## References

1. ADIPS Consensus Guidelines for the Testing and Diagnosis of Hyperglycaemia in Pregnancy in Australia and New Zealand. [www.adips.org.au](http://www.adips.org.au) (accessed January 2018). 2014.
2. Metzger BE, Gabbe SG, Persson B, et al. International association of diabetes and pregnancy study groups recommendations on the diagnosis and classification of hyperglycemia in pregnancy. *Diabetes Care*. 2010;33:676-82
3. Metzger BE, Lowe LP, Dyer AR, et al. Hyperglycemia and adverse outcomes. *N Engl J Med*. 2008;358:1991-2002
4. Martin FI, Vogue A, Dargaville R, et al. The diagnosis of gestational diabetes. *Med J Aust*. 1991;155:112
5. Hoffman L, Nolan C, Wilson JD, Oats JJ, Simmons D. Gestational diabetes mellitus--management guidelines. The Australasian Diabetes in Pregnancy Society. *Med J Aust*. 1998;169:93-7
6. Moses RG, Morris GJ, Petocz P, San Gil F, Garg D. The impact of potential new diagnostic criteria on the prevalence of gestational diabetes mellitus in Australia. *Med J Aust*. 2011;194:338-40.
7. Wong VW, Lin A, Russell H. Adopting the new World Health Organization diagnostic criteria for gestational diabetes: How the prevalence changes in a high-risk region in Australia. *Diabetes Res Clin Pract*. 2017;129:148-53
8. Flack JR, Ross GP. Survey on testing for gestational diabetes mellitus in Australia. *Aust N Z J Obstet Gynaecol*. 2016;56:346-8
9. National Institute for Health and Care Excellence. <https://pathways.nice.org.uk/pathways/diabetes-in-pregnancy> 2016 (accessed January 2018).
10. American Diabetes Association. Classification and Diagnosis of Diabetes. *Diabetes Care*. 2016;39 Suppl 1:S13-22
11. Canadian Diabetes Association Clinical Practice Guidelines Expert Committee. Thompson D, Berger H, Feig D, et al. Diabetes and pregnancy. *Can J Diabetes*. 2013;37 Suppl 1:S168-83
12. Dobbins TA, Sullivan EA, Roberts CL, Simpson JM. Australian National Birthweight Percentiles by Sex and Gestational Age, 1998-2007. *MJA*. 2012;197:291-4
13. Diagnostic criteria and classification of hyperglycemia first detected in pregnancy: a World Health Organization Guideline. *Diabetes Res Clin Pract*. 2014;103:341-63
14. Jacklin PB, Maresh MJ, Patterson CC, Stanley KP, Dornhorst A, Burman-Roy S, et al. A cost-effectiveness comparison of the NICE 2015 and WHO 2013 diagnostic criteria for women with gestational diabetes with and without risk factors. *BMJ Open*. 2017;7:e016621
15. Farrar D, Simmonds M, Griffin S, et al. The identification and treatment of women with hyperglycaemia in pregnancy: an analysis of individual participant data, systematic reviews, meta-analyses and an economic evaluation. *HTA* 2016;20:86.
16. Basevi V, Di Mario S, Morciano C, Nonino F, Magrini N. Comment on: American Diabetes Association. Standards of medical care in diabetes--2011. *Diabetes Care* 2011;34(Suppl. 1):S11-S61. *Diabetes Care*. 2011;34:e53
17. Ohno MS, Sparks TN, Cheng YW, Caughey AB. Treating mild gestational diabetes mellitus: a cost-effectiveness analysis. *Am J Obstet Gynecol*. 2011;205:282 e1-7

18. Lee GT, Satyan MT, Grothusen JD, et al. A retrospective study comparing outcomes in a midwestern US population after introduction of IADPSG guidelines for gestational diabetes. *The journal of maternal-fetal & neonatal medicine*. 2017;1-6
19. Farrar D, Duley L, Dowswell T, Lawlor DA. Different strategies for diagnosing gestational diabetes to improve maternal and infant health. *Cochrane Database Syst Rev*. 2017;8:CD007122
20. Laafira A, White SW, Griffin CJ, Graham D. Impact of the new IADPSG gestational diabetes diagnostic criteria on pregnancy outcomes in Western Australia. *Aust N Z J Obstet Gynaecol*. 2016;56:36-41
21. Jiang S, Chipps D, Cheung WN, Mongelli M. Comparison of adverse pregnancy outcomes based on the new IADPSG 2010 gestational diabetes criteria and maternal body mass index. *Aust N Z J Obstet Gynaecol*. 2017;57:533-9
22. Abell SK, Teede HJ. The IADPSG diagnostic criteria identify women with increased risk of adverse pregnancy outcomes in Victoria. *Aust N Z J Obstet Gynaecol*. 2017;57:564-8

STROBE Statement—Checklist of items that should be included in reports of *cohort studies*

|                              | Item No | Recommendation                                                                                                                                                                                                                                                                                                                                                                                                                                                                                                                                         |
|------------------------------|---------|--------------------------------------------------------------------------------------------------------------------------------------------------------------------------------------------------------------------------------------------------------------------------------------------------------------------------------------------------------------------------------------------------------------------------------------------------------------------------------------------------------------------------------------------------------|
| <b>Title and abstract</b>    | 1       | (a) Indicate the study's design with a commonly used term in the title or the abstract<br><b>Yes (page 1)</b><br>(b) Provide in the abstract an informative and balanced summary of what was done and what was found <b>Yes (page 2)</b>                                                                                                                                                                                                                                                                                                               |
| <b>Introduction</b>          |         |                                                                                                                                                                                                                                                                                                                                                                                                                                                                                                                                                        |
| Background/rationale         | 2       | Explain the scientific background and rationale for the investigation being reported<br><b>Yes (page 3)</b>                                                                                                                                                                                                                                                                                                                                                                                                                                            |
| Objectives                   | 3       | State specific objectives, including any prespecified hypotheses <b>Yes (page 3)</b>                                                                                                                                                                                                                                                                                                                                                                                                                                                                   |
| <b>Methods</b>               |         |                                                                                                                                                                                                                                                                                                                                                                                                                                                                                                                                                        |
| Study design                 | 4       | Present key elements of study design early in the paper <b>Yes (page 3-4)</b>                                                                                                                                                                                                                                                                                                                                                                                                                                                                          |
| Setting                      | 5       | Describe the setting, locations, and relevant dates, including periods of recruitment, exposure, follow-up, and data collection <b>Yes (page 3)</b>                                                                                                                                                                                                                                                                                                                                                                                                    |
| Participants                 | 6       | (a) Give the eligibility criteria, and the sources and methods of selection of participants. Describe methods of follow-up <b>Yes – no exclusion criteria (page 3)</b><br>(b) For matched studies, give matching criteria and number of exposed and unexposed <b>N/A</b>                                                                                                                                                                                                                                                                               |
| Variables                    | 7       | Clearly define all outcomes, exposures, predictors, potential confounders, and effect modifiers. Give diagnostic criteria, if applicable <b>Yes (page 4)</b>                                                                                                                                                                                                                                                                                                                                                                                           |
| Data sources/<br>measurement | 8*      | For each variable of interest, give sources of data and details of methods of assessment (measurement). Describe comparability of assessment methods if there is more than one group <b>Yes (page 4)</b>                                                                                                                                                                                                                                                                                                                                               |
| Bias                         | 9       | Describe any efforts to address potential sources of bias <b>Yes (page 4 and 7)</b>                                                                                                                                                                                                                                                                                                                                                                                                                                                                    |
| Study size                   | 10      | Explain how the study size was arrived at <b>Yes (entire cohort, page 4)</b>                                                                                                                                                                                                                                                                                                                                                                                                                                                                           |
| Quantitative variables       | 11      | Explain how quantitative variables were handled in the analyses. If applicable, describe which groupings were chosen and why <b>Yes (page 4)</b>                                                                                                                                                                                                                                                                                                                                                                                                       |
| Statistical methods          | 12      | (a) Describe all statistical methods, including those used to control for confounding <b>Yes, confounding not particularly relevant as outcomes were examined across whole cohorts (page 4-5)</b><br>(b) Describe any methods used to examine subgroups and interactions <b>N/A (no subgroups)</b><br>(c) Explain how missing data were addressed <b>N/A (nil was missing)</b><br>(d) If applicable, explain how loss to follow-up was addressed <b>N/A (nil lost to follow-up)</b><br>(e) Describe any sensitivity analyses <b>N/A (not required)</b> |
| <b>Results</b>               |         |                                                                                                                                                                                                                                                                                                                                                                                                                                                                                                                                                        |
| Participants                 | 13*     | (a) Report numbers of individuals at each stage of study—eg numbers potentially eligible, examined for eligibility, confirmed eligible, included in the study, completing follow-up, and analysed <b>Yes (page 5)</b><br>(b) Give reasons for non-participation at each stage <b>N/A (retrospective analysis with no possibility for non-participation)</b><br>(c) Consider use of a flow diagram <b>Not used</b>                                                                                                                                      |
| Descriptive data             | 14*     | (a) Give characteristics of study participants (eg demographic, clinical, social) and information on exposures and potential confounders <b>Yes (page 5 and Table 2)</b><br>(b) Indicate number of participants with missing data for each variable of interest <b>Nil missing</b>                                                                                                                                                                                                                                                                     |

|                          |     |                                                                                                                                                                                                                                                                                                                                                                                                                                                                       |
|--------------------------|-----|-----------------------------------------------------------------------------------------------------------------------------------------------------------------------------------------------------------------------------------------------------------------------------------------------------------------------------------------------------------------------------------------------------------------------------------------------------------------------|
|                          |     | (c) Summarise follow-up time (eg, average and total amount) <b>N/A (examined at time of delivery – no long-term follow up)</b>                                                                                                                                                                                                                                                                                                                                        |
| Outcome data             | 15* | Report numbers of outcome events or summary measures over time <b>Yes (page 5-6)</b>                                                                                                                                                                                                                                                                                                                                                                                  |
| Main results             | 16  | (a) Give unadjusted estimates and, if applicable, confounder-adjusted estimates and their precision (eg, 95% confidence interval). Make clear which confounders were adjusted for and why they were included <b>Yes (page 5-6, tables 3-4)</b><br>(b) Report category boundaries when continuous variables were categorized <b>N/A</b><br>(c) If relevant, consider translating estimates of relative risk into absolute risk for a meaningful time period <b>N/A</b> |
| Other analyses           | 17  | Report other analyses done—eg analyses of subgroups and interactions, and sensitivity analyses <b>N/A</b>                                                                                                                                                                                                                                                                                                                                                             |
| <b>Discussion</b>        |     |                                                                                                                                                                                                                                                                                                                                                                                                                                                                       |
| Key results              | 18  | Summarise key results with reference to study objectives <b>Yes (page 6-7)</b>                                                                                                                                                                                                                                                                                                                                                                                        |
| Limitations              | 19  | Discuss limitations of the study, taking into account sources of potential bias or imprecision. Discuss both direction and magnitude of any potential bias <b>Yes (page 7)</b>                                                                                                                                                                                                                                                                                        |
| Interpretation           | 20  | Give a cautious overall interpretation of results considering objectives, limitations, multiplicity of analyses, results from similar studies, and other relevant evidence <b>Yes (page 7-8)</b>                                                                                                                                                                                                                                                                      |
| Generalisability         | 21  | Discuss the generalisability (external validity) of the study results <b>Yes (page 8)</b>                                                                                                                                                                                                                                                                                                                                                                             |
| <b>Other information</b> |     |                                                                                                                                                                                                                                                                                                                                                                                                                                                                       |
| Funding                  | 22  | Give the source of funding and the role of the funders for the present study and, if applicable, for the original study on which the present article is based <b>Yes (page 8)</b>                                                                                                                                                                                                                                                                                     |

\*Give information separately for exposed and unexposed groups.

**Note:** An Explanation and Elaboration article discusses each checklist item and gives methodological background and published examples of transparent reporting. The STROBE checklist is best used in conjunction with this article (freely available on the Web sites of PLoS Medicine at <http://www.plosmedicine.org/>, Annals of Internal Medicine at <http://www.annals.org/>, and Epidemiology at <http://www.epidem.com/>). Information on the STROBE Initiative is available at <http://www.strobe-statement.org>.

# BMJ Open

## Implications of the introduction of new criteria for the diagnosis of gestational diabetes: a health outcome and cost of care analysis

|                                 |                                                                                                                                                                                                                                                                                                                                                                             |
|---------------------------------|-----------------------------------------------------------------------------------------------------------------------------------------------------------------------------------------------------------------------------------------------------------------------------------------------------------------------------------------------------------------------------|
| Journal:                        | <i>BMJ Open</i>                                                                                                                                                                                                                                                                                                                                                             |
| Manuscript ID                   | bmjopen-2018-023293.R2                                                                                                                                                                                                                                                                                                                                                      |
| Article Type:                   | Research                                                                                                                                                                                                                                                                                                                                                                    |
| Date Submitted by the Author:   | 06-Oct-2018                                                                                                                                                                                                                                                                                                                                                                 |
| Complete List of Authors:       | Cade, Thomas; Royal Women's Hospital, Pregnancy Research Centre; University of Melbourne, Obstetrics and Gynaecology<br>Polyakov, Alexander; Royal Women's Hospital, Reproductive Services; University of Melbourne, Obstetrics and Gynaecology<br>Brennecke, Shaun; Royal Women's Hospital, Pregnancy Research Centre; University of Melbourne, Obstetrics and Gynaecology |
| <b>Primary Subject Heading</b>: | Obstetrics and gynaecology                                                                                                                                                                                                                                                                                                                                                  |
| Secondary Subject Heading:      | Diabetes and endocrinology                                                                                                                                                                                                                                                                                                                                                  |
| Keywords:                       | OBSTETRICS, Maternal medicine < OBSTETRICS, Fetal medicine < OBSTETRICS                                                                                                                                                                                                                                                                                                     |
|                                 |                                                                                                                                                                                                                                                                                                                                                                             |

SCHOLARONE™  
Manuscripts

# Implications of the introduction of new criteria for the diagnosis of gestational diabetes: a health outcome and cost of care analysis

Thomas J Cade<sup>1,2,3</sup>

Alexander Polyakov<sup>3,4</sup>

Shaun P Brennecke<sup>2,3</sup>

1. Diabetes Service, Royal Women's Hospital, Parkville, Victoria, Australia
2. Pregnancy Research Service, Department of Maternal Fetal Medicine, Royal Women's Hospital, Parkville, Victoria, Australia
3. Department of Obstetrics and Gynaecology, University of Melbourne, Parkville, Victoria, Australia
4. Department of Reproductive Biology, Royal Women's Hospital, Parkville, Victoria, Australia

Corresponding author: Dr Thomas Cade, Royal Women's Hospital, 20 Flemington Rd, Parkville, 3052, Australia.  
Email: [tom.cade@thewomens.org.au](mailto:tom.cade@thewomens.org.au) telephone +61 3 83452000

Word Count: 2719

## Abstract

### *Objective*

To identify effects on health outcomes from implementing new criteria diagnosing gestational diabetes (GDM) and to analyse costs-of-care associated with this change.

### *Design*

Quasi-experimental study comparing data from the calendar year before (2014) and after (2016) the change.

### *Setting*

Single, tertiary level, university-affiliated, maternity hospital.

### *Participants*

All women giving birth in the hospital, excluding those with pre-existing diabetes or multiple pregnancy.

### *Main outcome measures*

Primary outcomes were caesarean section, birthweight > 90<sup>th</sup> percentile for gestation, hypertensive disorder of pregnancy and pre-term birth less than 37 weeks. A number of secondary outcomes reported to be associated with GDM were also analysed were also analysed.

Care packages were derived for those without GDM, diet-controlled GDM and GDM requiring insulin. The Institutional Business Reporting Unit data for average occasions of service, pharmacy schedule for the costs of consumables and medications, and Medicare Benefits Schedule ultrasound services were used for costing each package. All costs were estimated in figures from the end of 2016 negating the need to adjust for Consumer Price Index increases.

### *Results*

There was an increase in annual incidence of GDM of 74% without overall improvements in primary health outcomes. This incurred a gross cost increase of \$904 178 and net of \$560 093. Babies of women with GDM had lower rates of neonatal hypoglycaemia and special care nursery admissions after the change, suggesting a milder spectrum of disease.

### *Conclusion*

New criteria for the diagnosis of GDM have significantly increased the incidence of GDM and the overall cost of GDM care. Without obvious changes in short-term outcomes, validation over other systems of diagnosis may require longer-term studies in cohorts utilising universal screening and treatment under these criteria.

### Strengths and limitations of this study

- Australia is one of the only major Western countries to introduce universal screening for GDM by new International Association of Diabetes in Pregnancy Study Group criteria and is uniquely poised to assess concerns about increased annual incidence and costs of care compared to any potential improvement in health outcomes.
- Concerns about an increase in diagnoses and “over-medicalisation” of women who erstwhile would have been considered normal have given many countries reason for caution in adopting the new criteria. Our findings may assist in decision making regarding this public health policy, and may highlight the need for longer-term follow-up of women with GDM and their babies treated under this system.
- As with any large retrospective audit, there are potential methodological flaws in data analysis, including unexplained selection bias and confounding. We have assessed the implication of adopting this criteria on a large entire cohort (not a specific subgroup) in an attempt to assess outcomes and costs as a surrogate for public health policy “en masse”, however it is noted that no social determinants of health were defined or analysed as part of the study.
- A major problem with assessing changes in diagnostic criteria in GDM lies within being unable to retrospectively identify those who were potentially underdiagnosed under older systems and assess their outcomes. We have thus assessed the impact on a large tertiary hospital as a whole and quantified the costs associated with the increased burden or care.

## Introduction

Diagnostic criteria for gestational diabetes (GDM) in Australia changed following a 2014 consensus statement by the Australian Diabetes in Pregnancy Society (ADIPS)<sup>1</sup> ratifying support for the International Association of Diabetes in Pregnancy Study Group's recommendations<sup>2</sup> (see table 1). These, in turn, used data from the Hyperglycaemia and Adverse Pregnancy Outcome (HAPO) study,<sup>3</sup> which was a large, prospective, observational study examining the influence of increasing blood glucose levels on a fasting glucose tolerance test on eventual adverse pregnancy outcome.

Previously, diagnostic criteria for GDM in Australia were derived from an earlier ADIPS consensus statement published in 1991<sup>4</sup> and re-endorsed in 1998<sup>5</sup> (see Table 1). It was based on the observed distributions of blood glucose levels tested in pregnant women at various maternity centres. These older criteria had been widely utilised for the last two decades in many Australian maternity centres including our own.

(Table 1 goes about here).

Since the introduction of the new criteria, concerns have focussed on the anticipated increase in annual incidence of GDM that these new criteria will cause and the resultant implications for workload. Early estimates of an annual increase of 35%<sup>6</sup> were followed by later data suggesting an almost doubling in some populations.<sup>7</sup> Although many major maternity centres in Australia have adopted the new criteria, a 2016 survey found variable adoption in Australia<sup>8</sup> and the criteria have not yet found international acceptance despite WHO endorsement.<sup>9, 10, 11</sup>

While it was never the intention of the HAPO authors to suggest a specific annual incidence for GDM, it is important to remember that the new criteria and the suggested relative risk reductions were derived from an untreated population. They were not derived from comparing the new criteria to any other existing methods of diagnosis. While the change may be important for uniformity in diagnosis and may result in clinically important outcomes in individuals previously not diagnosed with GDM, it is also important to assess whether any improvements are seen across large populations and, if so, whether they justify any increase in costs-of-care.

We aimed to estimate the impact of this change in a large tertiary maternity hospital by examining an entire cohort of pregnant women immediately before and immediately after the new criteria were adopted. Specifically, we wished to examine the increase in annual incidence of GDM, assign an appropriate cost-of-care to the high-risk model employed for GDM and compare this to any hospital-wide change in the HAPO outcomes upon which the new criteria are based.

## Patients and Methods

As the new criteria for diagnosing GDM were introduced in our hospital in mid 2015, we selected 2014 as the last full calendar year of diagnosis under 1991/1998 ADIPS criteria<sup>4,5</sup> and 2016 as the first full year of diagnosis under the new IADPSG criteria.<sup>2</sup> All women having care and delivering within the hospital were included for analysis, with exclusion limited

1  
2  
3 only to pre-existing diabetes (i.e. those who did not undergo screening for GDM) and  
4 multiple pregnancy (an exclusion criterion in the HAPO trial). Women in Australia have  
5 universal screening for GDM between 24 and 28 weeks.  
6

7  
8 Clinical care during the periods of study was divided into three groups: those without GDM,  
9 GDM managed with dietary measures, and GDM requiring insulin. For occasions of clinical  
10 review, such as antenatal clinic consultations, group class and phone-call consultations, and  
11 pregnancy day care admissions, cost was estimated from “average occasion of service”  
12 figures for the relevant health professional, as collected by the institutional Business  
13 Performance Reporting Unit. The pharmacy schedule was consulted for the costs of  
14 consumables and medications. The Medicare Benefits Schedule was considered the most  
15 reproducible and valid estimation for the cost of ultrasound services. All costs were  
16 estimated in figures from the end of 2016, thus negating the need to adjust 2014 figures for  
17 consumer price index (CPI) or other potential inflationary changes.  
18

19  
20 Women diagnosed with GDM receive a three-hour group class with a diabetes educator,  
21 dietician and physiotherapist. In addition, most have a follow-up one-on-one session with a  
22 dietician, phone consultations with diabetes educators, two extra antenatal clinics,  
23 assessment by consultant obstetricians rather than by midwives or junior medical staff, and  
24 a growth ultrasound. They also require a glucometer and testing strips.  
25

26  
27 If dietary measures fail to control blood glucose levels (BGLs) at acceptable levels, they also  
28 require insulin, a one-on-one session with a diabetes educator, an extra antenatal clinic,  
29 often a second growth scan and sometimes fetal heart rate monitoring via cardiotocography  
30 (CTG).  
31

32  
33 Demographic data were collected for each group, including age, body mass index (BMI), pre-  
34 existing polycystic ovarian syndrome (PCOS), smoking, parity and previous caesarean  
35 section (LUSCS).  
36

37  
38 Primary outcomes were those upon which the new criteria were based, namely caesarean  
39 section rates, hypertensive disorder of pregnancy, birthweight greater than the 90<sup>th</sup>  
40 percentile, pre-term birth less than 37 weeks.<sup>2</sup>  
41

42  
43 Additional maternal outcomes were induction of labour, instrumental birth, third degree  
44 tear and post-partum haemorrhage. Additional fetal outcomes were greater than the 95<sup>th</sup>  
45 percentile, less than the 10<sup>th</sup> percentile, admission to special care nursery (SCN) or neonatal  
46 intensive care (NICU), estimated gestational age, pre-term birth less than 34 weeks,  
47 respiratory distress, jaundice requiring phototherapy, hypoglycaemia, stillbirth, neonatal  
48 death, and Apgar score less than 7 at 5 minutes. Birth trauma was initially included as an  
49 outcome but subsequently removed due to a change in coding practices midway through  
50 the study period which artificially lowered overall recorded rates.  
51

52  
53 Neonatal birthweights were plotted by percentile as described by the latest Australian birth  
54 charts.<sup>12</sup> Neonatal hypoglycaemia was defined as any ward-measured BGL less than 2.6  
55 mmol/L.  
56  
57  
58  
59

1  
2  
3 Maternal and neonatal outcomes were examined for the entire hospital cohort (to examine  
4 the change as a public health policy) and for just women diagnosed with GDM in 2014  
5 (before the change) compared to those in 2016 (after the change).  
6

7  
8 Data were collected prospectively by the institutional Quality and Safety Unit from the  
9 Maternity Care Information System ("MCIS", GE Healthcare, Little Chalfont, UK) and  
10 collated in MS Excel spreadsheets (Microsoft, Redmond, USA). Data were analysed after  
11 selecting the demographics and outcomes of interest. Maternal and neonatal  
12 characteristics were compared using descriptive statistics. Discrete variables are reported in  
13 the tables as total numbers with percentage in parentheses and continuous variables are  
14 reported as the mean with 95% confidence intervals in parentheses. For univariate analyses,  
15 discrete variables were analysed using Fisher's exact test or Pearson's chi-squared test and  
16 continuous variables using Student's t-test. Multivariate analysis with logistic regression was  
17 planned for any outcome which met statistical and clinical significance and had documented  
18 risk factors other than GDM. P-values are reported in the final column of all tables with less  
19 than 0.05 considered statistically significant and highlighted in bold. Statistical analysis was  
20 performed using STATA 9.2 (StataCorp, Texas, USA).  
21  
22

23  
24 The study was approved as an anonymised audit by the Institutional Research and Ethics  
25 Committee with identifying information removed before analysis.  
26

### 27 *Patient and Public Involvement*

28  
29 This was an anonymised retrospective audit, thus patients and the public were not required  
30 to be directly involved in recruitment or conduct of the study. Indeed, emphasis was given  
31 toward assessing the implications of this public health policy on a patient cohort as a whole  
32 rather than subgroup or individual outcomes.  
33  
34

## 35 **Results**

### 36 *Demographics and Health Outcomes*

37  
38 In 2014, there were 7010 pregnant women of whom 416 were diagnosed with GDM  
39 (incidence 5.93%) and in 2016, there were 7488 pregnant women of whom 774 were  
40 diagnosed with GDM (incidence 10.3%). The demographics of the two cohorts are shown in  
41 Table 2.  
42  
43

44  
45 (Table 2 goes about here).  
46

47  
48 Although the second cohort was statistically significantly older, this was only by a mean of  
49 four months. The diagnosis of PCOS was higher but overall rates were low and possibly  
50 under-reported. These two findings were statistically significant but unlikely to be clinically  
51 relevant. The relative increase of 73.7% in the annual incidence of GDM is most likely  
52 attributable to the change in diagnosis rather than to any changed demographic factors.  
53

54  
55 The maternal outcomes for the entire cohort are shown in Table 3 and the fetal outcomes in  
56 Table 4, with the HAPO/IADPSG outcomes highlighted in bold.  
57

58 (Tables 3 and 4 go about here).  
59

Following the introduction of the new GDM criteria, there has not appeared to be a hospital-wide decrease in the main outcomes reported in the sub-analysis of the HAPO trial, most particularly in birthweight >90<sup>th</sup> percentile for gestation, caesarean section, hypertensive disorder of pregnancy or pre-term birth <37 weeks. However, there has been a hospital-wide decrease in neonatal death and birthweight greater than the 95<sup>th</sup> percentile in the fetal outcomes and an increase in induction of labour and instrumental birth in the maternal outcomes. The decrease in neonatal death rates was unexplained, almost always occurs at the extreme of prematurity and the absolute difference was low at 0.2%. The change most likely attributable to tightening GDM diagnoses is a small reduction in very large babies.

The maternal and fetal outcomes for the women with GDM are shown in Tables 5 and 6 respectively. There was a reduction in the annual incidence of third degree tears from 5.29% to 2.58% in the mothers with GDM. There was also a reduction in the incidence of neonatal hypoglycaemia (from 9.62% to 5.94%) and admissions to special care nursery (from 12.5% to 7.75%).

(Tables 5 and 6 go about here)

#### *Costs of care*

The average antenatal care package for women without GDM costs \$923 and for the 15% that require post-dates care this is \$1742 (when extra clinics, and CTG and amniotic fluid monitoring are required). The care package for women with GDM who do not need insulin is \$2026 and for those that do need insulin is \$2534 (or \$3826 if CTG monitoring from 36 weeks is undertaken: on audit during the study period, this occurred in 50% of patients).

In 2014, 210 women with GDM were controlled with dietary measures and 206 required insulin. The costs of care for GDM was calculated as follows:

GDM diet controlled:  $210 \times \$2026 = \$425\ 460$

GDM insulin controlled:  $0.5 \times 206 \times \$2534 + 0.5 \times 206 \times \$3826 = \$655\ 080$

**Total = \$1 080 540**

In 2016, 413 women with GDM were controlled with dietary measures and 361 required insulin. The costs of care for GDM was calculated as follows:

GDM diet controlled:  $413 \times \$2026 = \$836\ 738$

GDM insulin controlled:  $0.5 \times 361 \times \$2534 + 0.5 \times 361 \times \$3826 = \$1\ 147\ 980$

**Total = \$1 984 718**

The gross cost increase for care of women with GDM was thus \$904 178. The net cost increase can be determined by attributing the cost of standard care to the excess diagnoses of GDM. If we round the incidence of GDM in 2014 up to 6% and use this with the total number of deliveries in 2016 (n=7420), the approximate number of women diagnosed with GDM if the criteria did not change would have been:  $0.06 \times 7420 = 445$ . The approximate excess number of cases of GDM is the total in 2016 (n = 774) minus this figure (n = 445)

1  
2  
3 which is:  $774 - 445 = 329$ . We can then apply this number to routine care (bearing in  
4 mind 15% of those undergoing routine care require post-dates monitoring) as follows:

$$0.85 \times 329 \times \$923 + 0.15 \times 329 \times \$1742 = \$344\,085$$

5  
6  
7 The net cost, which greater represents the change in antenatal resources, is then the gross  
8 cost increase minus this figure:

$$\$904\,178 - \$344\,085 = \$560\,093$$

9  
10  
11 The hospital has thus spent approximately **\$560 093** caring for women with GDM because  
12 of the change in criteria.

## 13 14 15 16 Discussion

17  
18  
19 HAPO<sup>3</sup> was a landmark study for several reasons, namely its sheer size (over 25 000  
20 pregnant women), its robust statistical methods, and its aim to unify disparate international  
21 views about the significance of GDM and the best way to diagnose it. The IADPSG sub-  
22 analysis<sup>2</sup> used important clinical outcomes in identifying a “best-fit” for cut-off values within  
23 the 75-gram glucose tolerance test (GTT) to diagnose GDM: most are routinely measured in  
24 clinical care (with the exception of cord C-peptide and fetal fat distribution). The resulting  
25 recommendation was for a 75-gram GTT for all women (regardless of baseline risk) with  
26 levels of greater than 5.1 mmol/L at fasting, 10 mmol/L at one-hour and 8.5 mmol/L at two-  
27 hours considered diagnostic.

28  
29  
30 Despite a WHO statement endorsing the new criteria,<sup>13</sup> there has been a failure of  
31 international acceptance to screen for GDM in this way. The National Institute of Clinical  
32 Excellence which guides care in the United Kingdom is perhaps the most striking example,  
33 recommending only screening those patients with risk factors and using levels of greater  
34 than or equal to 5.6 mmol/L at fasting and 7.8 mmol/L at two-hours.<sup>9</sup> A sophisticated  
35 economic evaluation found this approach to be superior in their population<sup>14</sup>, and an  
36 earlier economic evaluation found that it was not currently cost-effective to routinely  
37 identify pregnant women for hyperglycaemia<sup>15</sup>. This latter also suggested further research  
38 into longer term health-outcomes of women and babies affected by GDM and more cost-  
39 effective ways of treating GDM, a sentiment reiterated by the findings of our manuscript.

40  
41  
42 Economic evaluations in American populations have also tended to favour existing screening  
43 criteria<sup>16,17,18</sup>, albeit with less robust methodology and with different existing screening  
44 methods to both the UK and Australia. The latest Cochrane review concluded that there is  
45 insufficient evidence to prefer any particular screening method for GDM over another.<sup>19</sup>

46  
47  
48 The new criteria were a major change to established practice in Australia. The abolition of  
49 the non-fasting glucose challenge test (GCT) and the introduction of the one-hour BGL on  
50 the GTT were both new. The fasting BGL was tightened from greater than or equal to 5.5  
51 mmol/L to 5.1 mmol/L and the two-hour level eased from greater than or equal to 8.0  
52 mmol/L to 8.5 mmol/L. Some studies have tried to examine outcomes in patients who may  
53 have been diagnosed with GDM under the new system but not under the old.<sup>20,21,22</sup>

54  
55 Generally, they have reported groups at higher risk of adverse outcome (particularly  
56 caesarean section and large babies) who may have been previously underdiagnosed, but  
57 such an approach is flawed because of the abolition of the glucose challenge test and the  
58

1  
2  
3 introduction of the previously untested one-hour BGL. It thus is not possible to  
4 retrospectively examine the outcomes of those who may have had a false negative on the  
5 GCT or those who may have only tested positive on the new one-hour level.  
6

7 A separate approach, one adopted by this study, is to quantify any overall changes in clinical  
8 outcomes and attribute a cost to the increased burden of care and a saving to any potential  
9 outcome improvements.  
10

11  
12 The strengths of this study include using a single, large, tertiary centre with a uniform urban  
13 catchment area and relatively stable demographics over the study period. The numbers  
14 were large with over 7000 births per year in each cohort, and the costs of care were  
15 quantifiable by an established institutional Business Performance Reporting Unit. Outcomes  
16 were readily identified from existing data management systems and were usually  
17 categorical (often binary) and not requiring extensive further investigation or statistical  
18 analysis. The weaknesses of the study are those always inherent within retrospective data,  
19 including the potential for treatment or ascertainment bias. However, as the outcomes of  
20 the entire cohort (rather than just those diagnosed with GDM were analysed) this was likely  
21 to be minimised. The latter point is important as the aim of the study was to estimate a  
22 public health impact overall, as a result of a public health policy change.  
23  
24

25  
26 We demonstrated a relative increased incidence of GDM of 74%, but we were unable to  
27 demonstrate any statistically significant improvements in major outcomes across the  
28 hospital as a whole. There was possibly a small improvement in the incidence of very large  
29 babies (greater than the 95<sup>th</sup> percentile) but the absolute changes were small (0.7%) and  
30 there was no change in babies greater than the 90<sup>th</sup> percentile. An apparent improvement  
31 in birth trauma was due to a change in coding practices (and removed as an outcome), and  
32 an improvement in the neonatal death rate was unexplained but very low in absolute terms  
33 (0.2%). This latter tended to be confined to babies of extreme prematurity born well before  
34 routine screening for GDM. It is important to note that these findings, in a retrospective  
35 analysis, may be subject to unrecognised selection bias or confounding and form part of a  
36 larger debate into the care for women with GDM.  
37  
38

39  
40 It may be reasonable to hypothesise that, with such minimal overall hospital-wide changes,  
41 that it is simply a lower-risk cohort being now diagnosed with GDM. This is somewhat, but  
42 not completely, borne out by analysing the same outcomes in women with GDM before and  
43 after the change. While major outcomes such as caesarean section rates, hypertensive  
44 disorders, pre-term birth and macrosomia have seemingly not changed, there has been a  
45 reduction in third degree tears and a substantial decrease in the number of babies  
46 diagnosed with hypoglycaemia and admitted to SCN. This is suggestive of an increase in  
47 diagnoses represented by women on the milder end of the spectrum of GDM.  
48  
49

50 We have also demonstrated an increase in gross costs of over A\$900 000 and in net costs of  
51 over A\$500 000 per annum. This is primarily due to employing a "high-risk" model of care to  
52 all women with GDM. While these costs are seemingly not redeemed in the short term by  
53 marked improved outcomes, better health care is not always defined by more economic  
54 models and there may be unquantified health outcomes demonstrable in longer term  
55 analysis of women with GDM and their babies treated under this system.  
56  
57  
58  
59

1  
2  
3 While the new criteria are laudable in their efforts at uniformity of diagnosis and adverse  
4 outcome avoidance, and possibly have improved clinical outcomes in sub-groups of women  
5 previously not diagnosed with GDM, there is lack of quality evidence supporting their  
6 superiority over other systems of diagnosis. Thus, further research is needed in three main  
7 areas. Firstly, it would be desirable to have prospective (and ideally randomised controlled  
8 trial) evidence examining the impact of this system of diagnosis over others employed  
9 around the world. Secondly, long-term outcomes of the women with GDM and their  
10 children may uncover health benefits not accounted for in immediate analyses like those  
11 presented in this study, for instance with improvements in childhood obesity rates. There  
12 may indeed be economic benefits that can be compared with the initial increase in costs of  
13 care but appropriate budgetary measures to ensure the initial hospitals of care are  
14 adequately reimbursed are essential. Finally, it is important to investigate more economic  
15 ways of antenatally managing women with GDM particularly in the lower risk group, for  
16 example those easily controlled with simple dietary measures or the increasing use of  
17 metformin in those currently being prescribed insulin.  
18  
19  
20

## 21 **Conclusion**

22  
23 The annual incidence of GDM has immediately and markedly increased due to the change in  
24 diagnostic criteria with a substantial increase in cost of care and with seemingly no clear  
25 changes in immediate clinical outcomes. Most particularly, macrosomia rates (>90<sup>th</sup>%),  
26 caesarean section rates and pre-term birth less than 37 weeks remain unchanged. We  
27 suggest that these results add weight to the need for longer-term data before confirming  
28 that HAPO/IADPSG criteria are superior to other systems of diagnosis. Such data would need  
29 to be derived from cohorts undergoing universal routine screening with these criteria, and  
30 quantifiable health benefits compared against increases in immediate costs of care such as  
31 we report here.  
32  
33  
34

## 35 **Declaration of Interests**

36  
37 There were no conflicts of interest with regards to any of the three authors.  
38  
39

## 40 **Contributor and guarantor information**

41 The corresponding author (TC) was responsible for the study design, literature review,  
42 collection and analysis of data, interpretation of clinical findings, writing of the manuscript  
43 and decision for submission. TC is responsible for the overall content and acts as guarantor.  
44 SB supervised the project and contributed to all of the above in a consulting role. AP  
45 contributed to planning and executing appropriate statistical analysis and with  
46 interpretation of the data. All authors contributed to the final manuscript review and final  
47 submission.  
48  
49

## 50 **Data Sharing Statement**

51  
52 There are no unpublished data from the study.  
53  
54  
55  
56  
57  
58  
59  
60

### **Role of the funding source**

The Royal Australian and New Zealand College of Obstetrics and Gynaecology, who awarded the Luke Proposch Perinatal Research Scholarship to the corresponding author to financially support this research, had no role in the study design, data collection, analysis and interpretation, writing of the report or decision to submit for publication. The corresponding author had full access to the data in the study and final responsibility for the decision to submit for publication.

### **Transparency Declaration**

The corresponding author (TC) affirms that the manuscript is an honest, accurate, and transparent account of the study being reported and that no important aspects of the study have been omitted.

## Tables

Table 1 1991/1998 ADIPS versus 2014 IADPSG Criteria for diagnosing GDM

|                        | 1991/1998 ADIPS                                                                               |                                               | 2014 IADPSG                                               |                                                                | 2015 NICE                                               |                                                    |
|------------------------|-----------------------------------------------------------------------------------------------|-----------------------------------------------|-----------------------------------------------------------|----------------------------------------------------------------|---------------------------------------------------------|----------------------------------------------------|
|                        | Type of test                                                                                  | Positive criteria                             | Type of test                                              | Positive criteria                                              | Type of test                                            | Positive criteria                                  |
| <b>Screening test</b>  | 50g non-fasting glucose challenge test<br><b>or</b><br>75g non-fasting glucose challenge test | ≥ 7.8mmol/L<br><br>≥ 8.0mmol/L                | Nil                                                       | N/A                                                            | Clinical risk assessment                                | Any one of five clinical risk factors <sup>9</sup> |
| <b>Diagnostic test</b> | 75g, 2-hour fasting glucose tolerance test (two levels)                                       | Fasting ≥ 5.5mmol/L<br><br>2 hour ≥ 8.0mmol/L | 75g, 2-hour fasting glucose tolerance test (three levels) | Fasting ≥ 5.1mmol/L<br>1 hour ≥ 10mmol/L<br>2 hour ≥ 8.5mmol/L | 75g, 2-hour fasting glucose tolerance test (two levels) | Fasting ≥ 5.6mmol/L<br><br>2 hour ≥ 7.8mmol/L      |

Table 2 Demographics of the 2014 and 2016 cohorts

|                          | 2014               | 2016               | p-value       |
|--------------------------|--------------------|--------------------|---------------|
| Total Deliveries         | 7010               | 7488               | n/a           |
| Age (yr)                 | 30.9 (30.8 – 31.0) | 31.2 (31.1 – 31.3) | <b>0.0016</b> |
| BMI (kg.m <sup>2</sup> ) | 24.8 (24.7 – 24.9) | 24.7 (24.6 – 24.8) | 0.28          |
| PCOS                     | 110 (1.57%)        | 151 (2.02%)        | <b>0.043</b>  |
| Smoking                  | 326 (4.65%)        | 303 (4.05%)        | 0.075         |
| Parity ≥ 1               | 3228 (46.1%)       | 3365 (44.9%)       | 0.18          |
| Previous LUSCS           | 960 (13.7%)        | 1027 (13.7%)       | 0.45          |

Table 3 Overall Maternal Outcomes in 2014 and 2016

|                              | 2014         | 2016         | p-value     |
|------------------------------|--------------|--------------|-------------|
| <b>Hypertensive disorder</b> | 332 (4.74%)  | 361 (4.82%)  | 0.81        |
| Induction of labour          | 2407 (34.3%) | 2725 (36.4%) | <b>0.01</b> |
| <b>Overall LUSCS rate</b>    | 1963 (28.0%) | 2070 (27.6%) | 0.63        |
| Emergency LUSCS rate         | 1088 (15.5%) | 1076 (14.3%) | 0.05        |
| Instrumental birth           | 1316 (18.8%) | 1513 (20.2%) | <b>0.03</b> |
| Third degree tear            | 217 (3.1%)   | 197 (2.6%)   | 0.09        |
| PPH                          | 1685 (24.0%) | 1765 (23.6%) | 0.51        |

Table 4 Overall Fetal Outcomes in 2014 and 2016

|                                    | 2014               | 2016               | p-value     |
|------------------------------------|--------------------|--------------------|-------------|
| EGA                                | 38.6 (38.6 – 38.7) | 38.6 (38.5 – 38.6) | 0.18        |
| Stillbirth                         | 36 (0.51%)         | 40 (0.53%)         | 0.86        |
| NND                                | 29 (0.41%)         | 16 (0.21%)         | <b>0.03</b> |
| Hypoglycaemia                      | 154 (2.20%)        | 170 (2.27%)        | 0.77        |
| Respiratory distress               | 140 (2.00%)        | 170 (2.27%)        | 0.26        |
| Jaundice<br>requiring phototherapy | 112 (1.60%)        | 135 (1.80%)        | 0.34        |
| Apgar < 7 at 5 min                 | 280 (3.99%)        | 286 (3.82%)        | 0.59        |
| <b>Birth &lt; 37 weeks</b>         | 645 (9.20%)        | 671 (8.96%)        | 0.62        |
| Birth < 34 weeks                   | 292 (4.17%)        | 325 (4.34%)        | 0.61        |
| Shoulder dystocia                  | 102 (1.46%)        | 131 (1.75%)        | 0.16        |
| Admission to NICU                  | 320 (4.56%)        | 366 (4.89%)        | 0.36        |
| Admission to SCN                   | 534 (7.62%)        | 537 (7.17%)        | 0.31        |
| <b>Birthweight (g)</b>             | 3289 (3274 – 3304) | 3275 (3271 – 3293) | 0.21        |
| Birthweight > 95%                  | 300 (4.31%)        | 269 (3.61%)        | <b>0.03</b> |
| <b>Birthweight &gt; 90%</b>        | 577 (8.28%)        | 586 (7.86%)        | 0.36        |
| Birthweight < 10%                  | 570 (8.18%)        | 616 (8.27%)        | 0.85        |
|                                    |                    |                    |             |

*Table 5 Maternal Outcomes of Women with GDM in 2014 compared to 2016*

|                       | <b>2014</b> | <b>2016</b> | <b>p-value</b> |
|-----------------------|-------------|-------------|----------------|
| Total                 | 416         | 774         | N/A            |
| Hypertensive disorder | 20 (4.80%)  | 35 (4.52%)  | 0.85           |
| Induction of labour   | 204 (49.0%) | 379 (49.0%) | 0.98           |
| Overall LUSCS rate    | 162 (38.9%) | 289 (37.3%) | 0.59           |
| Emergency LUSCS rate  | 71 (17.1%)  | 121 (15.6%) | 0.52           |
| Instrumental birth    | 83 (20.0%)  | 134 (17.3%) | 0.26           |
| Third degree tear     | 22 (5.29%)  | 20 (2.58%)  | <b>0.016</b>   |
| PPH                   | 121 (29.1%) | 205 (26.5%) | 0.34           |

*Table 6 Fetal Outcomes of Women with GDM in 2014 compared to 2016*

|                                 | <b>2014</b>        | <b>2016</b>        | <b>p-value</b> |
|---------------------------------|--------------------|--------------------|----------------|
| EGA                             | 37.8 (37.6 – 38.1) | 38.0 (37.9 – 38.2) | 0.13           |
| Stillbirth                      | 5 (1.20%)          | 3 (0.39%)          | 0.10           |
| NND                             | 0.00%              | 1 (0.13%)          | N/A            |
| Hypoglycaemia                   | 40 (9.62%)         | 46 (5.94%)         | <b>0.02</b>    |
| Respiratory distress            | 11 (2.64%)         | 12 (1.55%)         | 0.19           |
| Jaundice requiring phototherapy | 9 (2.16%)          | 12 (1.55)          | 0.44           |
| Apgar < 7 at 5 mins             | 19 (4.57%)         | 26 (3.36%)         | 0.30           |
| Birth < 37 weeks                | 51 (12.3%)         | 83 (10.7%)         | 0.42           |
| Birth < 34 weeks                | 25 (6.01%)         | 30 (3.88%)         | 0.10           |
| Shoulder dystocia               | 7 (1.68%)          | 5 (0.65%)          | 0.09           |
| Admission to NICU               | 27 (6.49%)         | 39 (5.04%)         | 0.30           |
| Admission to SCN                | 52 (12.5%)         | 60 (7.75%)         | <b>0.007</b>   |
| Birthweight                     | 3151 (3089 – 3213) | 3207 (3167 – 3248) | 0.12           |
| Birthweight > 95%               | 27 (6.49%)         | 35 (4.52%)         | 0.15           |
| Birthweight > 90%               | 48 (11.5%)         | 74 (9.56%)         | 0.28           |
| Birthweight < 10%               | 38 (9.13%)         | 60 (7.75%)         | 0.41           |

## References

1. ADIPS Consensus Guidelines for the Testing and Diagnosis of Hyperglycaemia in Pregnancy in Australia and New Zealand. [www.adips.org.au](http://www.adips.org.au) (accessed January 2018). 2014.
2. Metzger BE, Gabbe SG, Persson B, et al. International association of diabetes and pregnancy study groups recommendations on the diagnosis and classification of hyperglycemia in pregnancy. *Diabetes Care*. 2010;33:676-82
3. Metzger BE, Lowe LP, Dyer AR, et al. Hyperglycemia and adverse outcomes. *N Engl J Med*. 2008;358:1991-2002
4. Martin FI, Vogue A, Dargaville R, et al. The diagnosis of gestational diabetes. *Med J Aust*. 1991;155:112
5. Hoffman L, Nolan C, Wilson JD, Oats JJ, Simmons D. Gestational diabetes mellitus--management guidelines. The Australasian Diabetes in Pregnancy Society. *Med J Aust*. 1998;169:93-7
6. Moses RG, Morris GJ, Petocz P, San Gil F, Garg D. The impact of potential new diagnostic criteria on the prevalence of gestational diabetes mellitus in Australia. *Med J Aust*. 2011;194:338-40.
7. Wong VW, Lin A, Russell H. Adopting the new World Health Organization diagnostic criteria for gestational diabetes: How the prevalence changes in a high-risk region in Australia. *Diabetes Res Clin Pract*. 2017;129:148-53
8. Flack JR, Ross GP. Survey on testing for gestational diabetes mellitus in Australia. *Aust N Z J Obstet Gynaecol*. 2016;56:346-8
9. National Institute for Health and Care Excellence. <https://pathways.nice.org.uk/pathways/diabetes-in-pregnancy> 2016 (accessed January 2018).
10. American Diabetes Association. Classification and Diagnosis of Diabetes. *Diabetes Care*. 2016;39 Suppl 1:S13-22
11. Canadian Diabetes Association Clinical Practice Guidelines Expert Committee. Thompson D, Berger H, Feig D, et al. Diabetes and pregnancy. *Can J Diabetes*. 2013;37 Suppl 1:S168-83
12. Dobbins TA, Sullivan EA, Roberts CL, Simpson JM. Australian National Birthweight Percentiles by Sex and Gestational Age, 1998-2007. *MJA*. 2012;197:291-4
13. Diagnostic criteria and classification of hyperglycemia first detected in pregnancy: a World Health Organization Guideline. *Diabetes Res Clin Pract*. 2014;103:341-63
14. Jacklin PB, Maresh MJ, Patterson CC, Stanley KP, Dornhorst A, Burman-Roy S, et al. A cost-effectiveness comparison of the NICE 2015 and WHO 2013 diagnostic criteria for women with gestational diabetes with and without risk factors. *BMJ Open*. 2017;7:e016621
15. Farrar D, Simmonds M, Griffin S, et al. The identification and treatment of women with hyperglycaemia in pregnancy: an analysis of individual participant data, systematic reviews, meta-analyses and an economic evaluation. *HTA* 2016;20:86.
16. Basevi V, Di Mario S, Morciano C, Nonino F, Magrini N. Comment on: American Diabetes Association. Standards of medical care in diabetes--2011. *Diabetes Care* 2011;34(Suppl. 1):S11-S61. *Diabetes Care*. 2011;34:e53
17. Ohno MS, Sparks TN, Cheng YW, Caughey AB. Treating mild gestational diabetes mellitus: a cost-effectiveness analysis. *Am J Obstet Gynecol*. 2011;205:282 e1-7

18. Lee GT, Satyan MT, Grothusen JD, et al. A retrospective study comparing outcomes in a midwestern US population after introduction of IADPSG guidelines for gestational diabetes. *The journal of maternal-fetal & neonatal medicine*. 2017;1-6
19. Farrar D, Duley L, Dowswell T, Lawlor DA. Different strategies for diagnosing gestational diabetes to improve maternal and infant health. *Cochrane Database Syst Rev*. 2017;8:CD007122
20. Laafira A, White SW, Griffin CJ, Graham D. Impact of the new IADPSG gestational diabetes diagnostic criteria on pregnancy outcomes in Western Australia. *Aust N Z J Obstet Gynaecol*. 2016;56:36-41
21. Jiang S, Chipps D, Cheung WN, Mongelli M. Comparison of adverse pregnancy outcomes based on the new IADPSG 2010 gestational diabetes criteria and maternal body mass index. *Aust N Z J Obstet Gynaecol*. 2017;57:533-9
22. Abell SK, Teede HJ. The IADPSG diagnostic criteria identify women with increased risk of adverse pregnancy outcomes in Victoria. *Aust N Z J Obstet Gynaecol*. 2017;57:564-8

STROBE Statement—Checklist of items that should be included in reports of *cohort studies*

|                              | Item No | Recommendation                                                                                                                                                                                                                                                                                                                                                                                                                                                                                                                                         |
|------------------------------|---------|--------------------------------------------------------------------------------------------------------------------------------------------------------------------------------------------------------------------------------------------------------------------------------------------------------------------------------------------------------------------------------------------------------------------------------------------------------------------------------------------------------------------------------------------------------|
| <b>Title and abstract</b>    | 1       | (a) Indicate the study's design with a commonly used term in the title or the abstract<br><b>Yes (page 1)</b><br>(b) Provide in the abstract an informative and balanced summary of what was done and what was found <b>Yes (page 2)</b>                                                                                                                                                                                                                                                                                                               |
| <b>Introduction</b>          |         |                                                                                                                                                                                                                                                                                                                                                                                                                                                                                                                                                        |
| Background/rationale         | 2       | Explain the scientific background and rationale for the investigation being reported<br><b>Yes (page 3)</b>                                                                                                                                                                                                                                                                                                                                                                                                                                            |
| Objectives                   | 3       | State specific objectives, including any prespecified hypotheses <b>Yes (page 3)</b>                                                                                                                                                                                                                                                                                                                                                                                                                                                                   |
| <b>Methods</b>               |         |                                                                                                                                                                                                                                                                                                                                                                                                                                                                                                                                                        |
| Study design                 | 4       | Present key elements of study design early in the paper <b>Yes (page 3-4)</b>                                                                                                                                                                                                                                                                                                                                                                                                                                                                          |
| Setting                      | 5       | Describe the setting, locations, and relevant dates, including periods of recruitment, exposure, follow-up, and data collection <b>Yes (page 3)</b>                                                                                                                                                                                                                                                                                                                                                                                                    |
| Participants                 | 6       | (a) Give the eligibility criteria, and the sources and methods of selection of participants. Describe methods of follow-up <b>Yes – no exclusion criteria (page 3)</b><br>(b) For matched studies, give matching criteria and number of exposed and unexposed <b>N/A</b>                                                                                                                                                                                                                                                                               |
| Variables                    | 7       | Clearly define all outcomes, exposures, predictors, potential confounders, and effect modifiers. Give diagnostic criteria, if applicable <b>Yes (page 4)</b>                                                                                                                                                                                                                                                                                                                                                                                           |
| Data sources/<br>measurement | 8*      | For each variable of interest, give sources of data and details of methods of assessment (measurement). Describe comparability of assessment methods if there is more than one group <b>Yes (page 4)</b>                                                                                                                                                                                                                                                                                                                                               |
| Bias                         | 9       | Describe any efforts to address potential sources of bias <b>Yes (page 4 and 7)</b>                                                                                                                                                                                                                                                                                                                                                                                                                                                                    |
| Study size                   | 10      | Explain how the study size was arrived at <b>Yes (entire cohort, page 4)</b>                                                                                                                                                                                                                                                                                                                                                                                                                                                                           |
| Quantitative variables       | 11      | Explain how quantitative variables were handled in the analyses. If applicable, describe which groupings were chosen and why <b>Yes (page 4)</b>                                                                                                                                                                                                                                                                                                                                                                                                       |
| Statistical methods          | 12      | (a) Describe all statistical methods, including those used to control for confounding <b>Yes, confounding not particularly relevant as outcomes were examined across whole cohorts (page 4-5)</b><br>(b) Describe any methods used to examine subgroups and interactions <b>N/A (no subgroups)</b><br>(c) Explain how missing data were addressed <b>N/A (nil was missing)</b><br>(d) If applicable, explain how loss to follow-up was addressed <b>N/A (nil lost to follow-up)</b><br>(e) Describe any sensitivity analyses <b>N/A (not required)</b> |
| <b>Results</b>               |         |                                                                                                                                                                                                                                                                                                                                                                                                                                                                                                                                                        |
| Participants                 | 13*     | (a) Report numbers of individuals at each stage of study—eg numbers potentially eligible, examined for eligibility, confirmed eligible, included in the study, completing follow-up, and analysed <b>Yes (page 5)</b><br>(b) Give reasons for non-participation at each stage <b>N/A (retrospective analysis with no possibility for non-participation)</b><br>(c) Consider use of a flow diagram <b>Not used</b>                                                                                                                                      |
| Descriptive data             | 14*     | (a) Give characteristics of study participants (eg demographic, clinical, social) and information on exposures and potential confounders <b>Yes (page 5 and Table 2)</b><br>(b) Indicate number of participants with missing data for each variable of interest <b>Nil missing</b>                                                                                                                                                                                                                                                                     |

|                          |     |                                                                                                                                                                                                                                                                                                                                                                                                                                                                       |
|--------------------------|-----|-----------------------------------------------------------------------------------------------------------------------------------------------------------------------------------------------------------------------------------------------------------------------------------------------------------------------------------------------------------------------------------------------------------------------------------------------------------------------|
|                          |     | (c) Summarise follow-up time (eg, average and total amount) <b>N/A (examined at time of delivery – no long-term follow up)</b>                                                                                                                                                                                                                                                                                                                                        |
| Outcome data             | 15* | Report numbers of outcome events or summary measures over time <b>Yes (page 5-6)</b>                                                                                                                                                                                                                                                                                                                                                                                  |
| Main results             | 16  | (a) Give unadjusted estimates and, if applicable, confounder-adjusted estimates and their precision (eg, 95% confidence interval). Make clear which confounders were adjusted for and why they were included <b>Yes (page 5-6, tables 3-4)</b><br>(b) Report category boundaries when continuous variables were categorized <b>N/A</b><br>(c) If relevant, consider translating estimates of relative risk into absolute risk for a meaningful time period <b>N/A</b> |
| Other analyses           | 17  | Report other analyses done—eg analyses of subgroups and interactions, and sensitivity analyses <b>N/A</b>                                                                                                                                                                                                                                                                                                                                                             |
| <b>Discussion</b>        |     |                                                                                                                                                                                                                                                                                                                                                                                                                                                                       |
| Key results              | 18  | Summarise key results with reference to study objectives <b>Yes (page 6-7)</b>                                                                                                                                                                                                                                                                                                                                                                                        |
| Limitations              | 19  | Discuss limitations of the study, taking into account sources of potential bias or imprecision. Discuss both direction and magnitude of any potential bias <b>Yes (page 7)</b>                                                                                                                                                                                                                                                                                        |
| Interpretation           | 20  | Give a cautious overall interpretation of results considering objectives, limitations, multiplicity of analyses, results from similar studies, and other relevant evidence <b>Yes (page 7-8)</b>                                                                                                                                                                                                                                                                      |
| Generalisability         | 21  | Discuss the generalisability (external validity) of the study results <b>Yes (page 8)</b>                                                                                                                                                                                                                                                                                                                                                                             |
| <b>Other information</b> |     |                                                                                                                                                                                                                                                                                                                                                                                                                                                                       |
| Funding                  | 22  | Give the source of funding and the role of the funders for the present study and, if applicable, for the original study on which the present article is based <b>Yes (page 8)</b>                                                                                                                                                                                                                                                                                     |

\*Give information separately for exposed and unexposed groups.

**Note:** An Explanation and Elaboration article discusses each checklist item and gives methodological background and published examples of transparent reporting. The STROBE checklist is best used in conjunction with this article (freely available on the Web sites of PLoS Medicine at <http://www.plosmedicine.org/>, Annals of Internal Medicine at <http://www.annals.org/>, and Epidemiology at <http://www.epidem.com/>). Information on the STROBE Initiative is available at <http://www.strobe-statement.org>.

# BMJ Open

## Implications of the introduction of new criteria for the diagnosis of gestational diabetes: a health outcome and cost of care analysis

|                                 |                                                                                                                                                                                                                                                                                                                                                                             |
|---------------------------------|-----------------------------------------------------------------------------------------------------------------------------------------------------------------------------------------------------------------------------------------------------------------------------------------------------------------------------------------------------------------------------|
| Journal:                        | <i>BMJ Open</i>                                                                                                                                                                                                                                                                                                                                                             |
| Manuscript ID                   | bmjopen-2018-023293.R3                                                                                                                                                                                                                                                                                                                                                      |
| Article Type:                   | Research                                                                                                                                                                                                                                                                                                                                                                    |
| Date Submitted by the Author:   | 20-Oct-2018                                                                                                                                                                                                                                                                                                                                                                 |
| Complete List of Authors:       | Cade, Thomas; Royal Women's Hospital, Pregnancy Research Centre; University of Melbourne, Obstetrics and Gynaecology<br>Polyakov, Alexander; Royal Women's Hospital, Reproductive Services; University of Melbourne, Obstetrics and Gynaecology<br>Brennecke, Shaun; Royal Women's Hospital, Pregnancy Research Centre; University of Melbourne, Obstetrics and Gynaecology |
| <b>Primary Subject Heading</b>: | Obstetrics and gynaecology                                                                                                                                                                                                                                                                                                                                                  |
| Secondary Subject Heading:      | Diabetes and endocrinology                                                                                                                                                                                                                                                                                                                                                  |
| Keywords:                       | OBSTETRICS, Maternal medicine < OBSTETRICS, Fetal medicine < OBSTETRICS                                                                                                                                                                                                                                                                                                     |
|                                 |                                                                                                                                                                                                                                                                                                                                                                             |

SCHOLARONE™  
Manuscripts

# Implications of the introduction of new criteria for the diagnosis of gestational diabetes: a health outcome and cost of care analysis

Thomas J Cade<sup>1,2,3</sup>

Alexander Polyakov<sup>3,4</sup>

Shaun P Brennecke<sup>2,3</sup>

1. Diabetes Service, Royal Women's Hospital, Parkville, Victoria, Australia
2. Pregnancy Research Service, Department of Maternal Fetal Medicine, Royal Women's Hospital, Parkville, Victoria, Australia
3. Department of Obstetrics and Gynaecology, University of Melbourne, Parkville, Victoria, Australia
4. Department of Reproductive Biology, Royal Women's Hospital, Parkville, Victoria, Australia

Corresponding author: Dr Thomas Cade, Royal Women's Hospital, 20 Flemington Rd, Parkville, 3052, Australia.

1  
2  
3 Email: [tom.cade@thewomens.org.au](mailto:tom.cade@thewomens.org.au) telephone +61 3 83452000  
4

5 Word Count: 2719  
6  
7  
8  
9  
10  
11  
12  
13  
14  
15  
16  
17  
18  
19  
20  
21  
22  
23  
24  
25  
26  
27  
28  
29  
30  
31  
32  
33  
34  
35  
36  
37  
38  
39  
40  
41  
42  
43  
44  
45  
46  
47  
48  
49  
50  
51  
52  
53  
54  
55  
56  
57  
58  
59  
60

For peer review only

## Abstract

### *Objective*

To identify effects on health outcomes from implementing new criteria diagnosing gestational diabetes (GDM) and to analyse costs-of-care associated with this change.

### *Design*

Quasi-experimental study comparing data from the calendar year before (2014) and after (2016) the change.

### *Setting*

Single, tertiary level, university-affiliated, maternity hospital.

### *Participants*

All women giving birth in the hospital, excluding those with pre-existing diabetes or multiple pregnancy.

### *Main outcome measures*

Primary outcomes were caesarean section, birthweight > 90<sup>th</sup> percentile for gestation, hypertensive disorder of pregnancy and pre-term birth less than 37 weeks. A number of secondary outcomes reported to be associated with GDM were also analysed were also analysed.

Care packages were derived for those without GDM, diet-controlled GDM and GDM requiring insulin. The Institutional Business Reporting Unit data for average occasions of service, pharmacy schedule for the costs of consumables and medications, and Medicare Benefits Schedule ultrasound services were used for costing each package. All costs were estimated in figures from the end of 2016 negating the need to adjust for Consumer Price Index increases.

### *Results*

There was an increase in annual incidence of GDM of 74% without overall improvements in primary health outcomes. This incurred a net cost increase of \$560 093. Babies of women with GDM had lower rates of neonatal hypoglycaemia and special care nursery admissions after the change, suggesting a milder spectrum of disease.

### *Conclusion*

New criteria for the diagnosis of GDM have increased the incidence of GDM and the overall cost of GDM care. Without obvious changes in short-term outcomes, validation over other systems of diagnosis may require longer-term studies in cohorts utilising universal screening and treatment under these criteria.

### Strengths and limitations of this study

- Australia is one of the only major Western countries to introduce universal screening for GDM by new International Association of Diabetes in Pregnancy Study Group criteria and is uniquely poised to assess concerns about increased annual incidence and costs of care compared to any potential improvement in health outcomes.
- Concerns about an increase in diagnoses and “over-medicalisation” of women who erstwhile would have been considered normal have given many countries reason for caution in adopting the new criteria. Our findings may assist in decision making regarding public health policy, albeit with findings applicable to clinical policy change within a single large centre. It may also highlight the need for longer-term follow-up of women with GDM and their babies treated under this system.
- As with any large retrospective audit, there are potential methodological flaws in data analysis, including unrecognised selection bias and confounding. We have assessed the implication of adopting this criteria on a large entire cohort (not a specific subgroup) in an attempt to assess outcomes and costs as a surrogate for public health policy “en masse”, however it is noted that no social determinants of health were defined or analysed as part of the study. Findings should be interpreted with respect to clinical policy change within a single centre and add to the debate about adopting this policy on a wider public scale.
- A major problem with assessing changes in diagnostic criteria in GDM lies within being unable to retrospectively identify those who were potentially underdiagnosed under older systems and assess their outcomes. We have thus assessed the impact on a large tertiary hospital as a whole and quantified the costs associated with the increased burden or care.

## Introduction

Diagnostic criteria for gestational diabetes (GDM) in Australia changed following a 2014 consensus statement by the Australian Diabetes in Pregnancy Society (ADIPS)<sup>1</sup> ratifying support for the International Association of Diabetes in Pregnancy Study Group's recommendations<sup>2</sup> (see table 1). These, in turn, used data from the Hyperglycaemia and Adverse Pregnancy Outcome (HAPO) study,<sup>3</sup> which was a large, prospective, observational study examining the influence of increasing blood glucose levels on a fasting glucose tolerance test on eventual adverse pregnancy outcome.

Previously, diagnostic criteria for GDM in Australia were derived from an earlier ADIPS consensus statement published in 1991<sup>4</sup> and re-endorsed in 1998<sup>5</sup> (see Table 1). It was based on the observed distributions of blood glucose levels tested in pregnant women at various maternity centres. These older criteria had been widely utilised for the last two decades in many Australian maternity centres including our own.

(Table 1 goes about here).

Since the introduction of the new criteria, concerns have focussed on the anticipated increase in annual incidence of GDM that these new criteria will cause and the resultant implications for workload. Early estimates of an annual increase of 35%<sup>6</sup> were followed by later data suggesting an almost doubling in some populations.<sup>7</sup> Although many major maternity centres in Australia have adopted the new criteria, a 2016 survey found variable adoption in Australia<sup>8</sup> and the criteria have not yet found international acceptance despite WHO endorsement.<sup>9, 10, 11</sup>

While it was never the intention of the HAPO authors to suggest a specific annual incidence for GDM, it is important to remember that the new criteria and the suggested relative risk reductions were derived from an untreated population. They were not derived from comparing the new criteria to any other existing methods of diagnosis. While the change may be important for uniformity in diagnosis and may result in clinically important outcomes in individuals previously not diagnosed with GDM, it is also important to assess whether any improvements are seen across large populations and, if so, whether they justify any increase in costs-of-care.

We aimed to estimate the impact of this change in a large tertiary maternity hospital by examining two pre-screening cohorts of pregnant women immediately before and immediately after the new criteria were adopted. Specifically, we wished to examine the increase in annual incidence of GDM, assign an appropriate cost-of-care to the high-risk model employed for GDM and compare this to any hospital-wide change in the HAPO outcomes upon which the new criteria are based.

## Patients and Methods

1  
2  
3 As the new criteria for diagnosing GDM were introduced in our hospital in mid 2015, we  
4 selected 2014 as the last full calendar year of diagnosis under 1991/1998 ADIPS criteria<sup>4,5</sup> and  
5 2016 as the first full year of diagnosis under the new IADPSG criteria.<sup>2</sup> All women having care  
6 and delivering within the hospital were included for analysis, with exclusion limited only to pre-  
7 existing diabetes (i.e. those who did not undergo screening for GDM) and multiple pregnancy  
8 (an exclusion criterion in the HAPO trial). Women in Australia have universal screening for GDM  
9 between 24 and 28 weeks.  
10  
11

12  
13 Clinical care during the periods of study was divided into three groups: those without GDM,  
14 GDM managed with dietary measures, and GDM requiring insulin. For occasions of clinical  
15 review, such as antenatal clinic consultations, group class and phone-call consultations, and  
16 pregnancy day care admissions, cost was estimated from “average occasion of service” figures  
17 for the relevant health professional, as collected by the institutional Business Performance  
18 Reporting Unit. The pharmacy schedule was consulted for the costs of consumables and  
19 medications. The Medicare Benefits Schedule was considered the most reproducible and valid  
20 estimation for the cost of ultrasound services. All costs were estimated in figures from the end  
21 of 2016, thus negating the need to adjust 2014 figures for consumer price index (CPI) or other  
22 potential inflationary changes.  
23  
24  
25

26  
27 Costs of in-patient care in our hospital consist mainly of “bed-days” for the mother (increased  
28 mainly by caesarean section compared to vaginal birth) or admissions to special care nursery or  
29 neonatal intensive care for the infant. In-patient costs were to be assessed if any differences  
30 were found in these two outcomes. The only difference in care for women with GDM compared  
31 to those without was a self-collected bi-daily BGL for one to two days which was not deemed a  
32 significant enough cost for quantification.  
33  
34

35  
36 Women diagnosed with GDM receive a three-hour group class with a diabetes educator,  
37 dietician and physiotherapist. In addition, most have a follow-up one-on-one session with a  
38 dietician, phone consultations with diabetes educators, two extra antenatal clinics, assessment  
39 by consultant obstetricians rather than by midwives or junior medical staff, and a growth  
40 ultrasound. They also require a glucometer and testing strips.  
41

42  
43 If dietary measures fail to control blood glucose levels (BGLs) at acceptable levels, they also  
44 require insulin, a one-on-one session with a diabetes educator, an extra antenatal clinic, often a  
45 second growth scan and sometimes fetal heart rate monitoring via cardiotocography (CTG).  
46

47  
48 Demographic data were collected for each group, including age, body mass index (BMI), pre-  
49 existing polycystic ovarian syndrome (PCOS), smoking, parity and previous caesarean section  
50 (LUSCS).  
51

52  
53 Primary outcomes were those upon which the new criteria were based, namely caesarean  
54 section rates, hypertensive disorder of pregnancy, birthweight greater than the 90<sup>th</sup> percentile,  
55 pre-term birth less than 37 weeks.<sup>2</sup>  
56  
57  
58  
59

1  
2  
3 Additional maternal outcomes were induction of labour, instrumental birth, third degree tear  
4 and post-partum haemorrhage. Additional fetal outcomes were greater than the 95<sup>th</sup>  
5 percentile, less than the 10<sup>th</sup> percentile, admission to special care nursery (SCN) or neonatal  
6 intensive care (NICU), estimated gestational age, pre-term birth less than 34 weeks, respiratory  
7 distress, jaundice requiring phototherapy, hypoglycaemia, stillbirth, neonatal death, and Apgar  
8 score less than 7 at 5 minutes. Birth trauma was initially included as an outcome but  
9 subsequently removed due to a change in coding practices midway through the study period  
10 which artificially lowered overall recorded rates.  
11  
12

13  
14 Neonatal birthweights were plotted by percentile as described by the latest Australian birth  
15 charts.<sup>12</sup> Neonatal hypoglycaemia was defined as any ward-measured BGL less than 2.6  
16 mmol/L.  
17  
18

19 Maternal and neonatal outcomes were examined for the entire hospital cohort (to examine the  
20 change as a hospital health policy) and for just women diagnosed with GDM in 2014 (before the  
21 change) compared to those in 2016 (after the change).  
22  
23

24 Data were collected prospectively by the institutional Quality and Safety Unit from the  
25 Maternity Care Information System ("MCIS", GE Healthcare, Little Chalfont, UK) and collated in  
26 MS Excel spreadsheets (Microsoft, Redmond, USA). Data were analysed after selecting the  
27 demographics and outcomes of interest. Maternal and neonatal characteristics were compared  
28 using descriptive statistics. Discrete variables are reported in the tables as total numbers with  
29 percentage in parentheses and continuous variables are reported as the mean with 95%  
30 confidence intervals in parentheses. For univariate analyses, discrete variables were analysed  
31 using Fisher's exact test or Pearson's chi-squared test and continuous variables using Student's  
32 t-test. Multivariate analysis with logistic regression was planned for any outcome which met  
33 statistical and clinical significance and had documented risk factors other than GDM. P-values  
34 are reported in the final column of all tables with less than 0.05 considered statistically  
35 significant and highlighted in bold. Statistical analysis was performed using STATA 9.2  
36 (StataCorp, Texas, USA).  
37  
38  
39  
40

41 The study was approved as an anonymised audit by the Institutional Research and Ethics  
42 Committee with identifying information removed before analysis.  
43  
44

#### 45 *Patient and Public Involvement*

46

47 This was an anonymised retrospective audit, thus patients and the public were not required to  
48 be directly involved in recruitment or conduct of the study. Indeed, emphasis was given toward  
49 assessing the implications of this clinical health policy on a patient cohort as a whole rather  
50 than subgroup or individual outcomes.  
51  
52

## 53 **Results**

54

### 55 *Demographics and Health Outcomes*

56  
57  
58  
59  
60

1  
2  
3 In 2014, there were 7010 pregnant women of whom 416 were diagnosed with GDM (incidence  
4 5.93%) and in 2016, there were 7488 pregnant women of whom 774 were diagnosed with GDM  
5 (incidence 10.3%). The demographics of the two cohorts are shown in Table 2.  
6  
7

8 (Table 2 goes about here).  
9

10 Although the second cohort was statistically significantly older, this was only by a mean of four  
11 months. The diagnosis of PCOS was higher but overall rates were low and possibly under-  
12 reported. These two findings were statistically significant but unlikely to be clinically relevant.  
13 The relative increase of 73.7% in the annual incidence of GDM is most likely attributable to the  
14 change in diagnosis rather than to any changed demographic factors.  
15  
16

17  
18 The maternal outcomes for the entire cohort are shown in Table 3 and the fetal outcomes in  
19 Table 4, with the HAPO/IADPSG outcomes highlighted in bold.  
20

21 (Tables 3 and 4 go about here).  
22  
23

24 Following the introduction of the new GDM criteria, there has not appeared to be a hospital-  
25 wide decrease in the main outcomes reported in the sub-analysis of the HAPO study, most  
26 particularly in birthweight >90<sup>th</sup> percentile for gestation, caesarean section, hypertensive  
27 disorder of pregnancy or pre-term birth <37 weeks. However, there has been a hospital-wide  
28 decrease in neonatal death and birthweight greater than the 95<sup>th</sup> percentile in the fetal  
29 outcomes and an increase in induction of labour and instrumental birth in the maternal  
30 outcomes. The decrease in neonatal death rates was unexplained, almost always occurs at the  
31 extreme of prematurity and the absolute difference was low at 0.2%. The change most likely  
32 attributable to tightening GDM diagnoses is a small reduction in very large babies.  
33  
34

35  
36 The maternal and fetal outcomes for the women with GDM are shown in Tables 5 and 6  
37 respectively. There was a reduction in the annual incidence of third degree tears from 5.29% to  
38 2.58% in the mothers with GDM. There was also a reduction in the incidence of neonatal  
39 hypoglycaemia (from 9.62% to 5.94%) and admissions to special care nursery (from 12.5% to  
40 7.75%).  
41  
42

43 (Tables 5 and 6 go about here)  
44  
45

#### 46 *Costs of care* 47

48 The average antenatal care package for women without GDM costs \$923 and for the 15% that  
49 require post-dates care this is \$1742 (when extra clinics, and CTG and amniotic fluid monitoring  
50 are required). The care package for women with GDM who do not need insulin is \$2026 and for  
51 those that do need insulin is \$2534 (or \$3826 if CTG monitoring from 36 weeks is undertaken:  
52 on audit during the study period, this occurred in 50% of patients).  
53  
54

55  
56 In 2014, 210 women with GDM were controlled with dietary measures and 206 required insulin.  
57 The costs of care for GDM was calculated as follows:  
58  
59

GDM diet controlled:  $210 \times \$2026 = \$425\ 460$

GDM insulin controlled:  $0.5 \times 206 \times \$2534 + 0.5 \times 206 \times \$3826 = \$655\ 080$

**Total = \$1 080 540**

In 2016, 413 women with GDM were controlled with dietary measures and 361 required insulin. The costs of care for GDM was calculated as follows:

GDM diet controlled:  $413 \times \$2026 = \$836\ 738$

GDM insulin controlled:  $0.5 \times 361 \times \$2534 + 0.5 \times 361 \times \$3826 = \$1\ 147\ 980$

**Total = \$1 984 718**

The gross cost increase for care of women with GDM was thus \$904 178. The net cost increase can be determined by attributing the cost of standard care to the excess diagnoses of GDM. If we round the incidence of GDM in 2014 up to 6% and use this with the total number of deliveries in 2016 ( $n=7420$ ), the approximate number of women diagnosed with GDM if the criteria did not change would have been:  $0.06 \times 7420 = 445$ . The approximate excess number of cases of GDM is the total in 2016 ( $n = 774$ ) minus this figure ( $n = 445$ ) which is:  $774 - 445 = 329$ . We can then apply this number to routine care (bearing in mind 15% of those undergoing routine care require post-dates monitoring) as follows:

$$0.85 \times 329 \times \$923 + 0.15 \times 329 \times \$1742 = \$344\ 085$$

The net cost, which represents the change in antenatal resources, is then the gross cost increase minus this figure:

$$\$904\ 178 - \$344\ 085 = \$560\ 093$$

The hospital has thus spent approximately **\$560 093** caring for women with GDM because of the change in criteria.

## Discussion

HAPO<sup>3</sup> was a landmark study for several reasons, namely its sheer size (over 25 000 pregnant women), its robust statistical methods, and its aim to unify disparate international views about the significance of GDM and the best way to diagnose it. The IADPSG sub-analysis<sup>2</sup> used important clinical outcomes in identifying a “best-fit” for cut-off values within the 75-gram glucose tolerance test (GTT) to diagnose GDM: most are routinely measured in clinical care (with the exception of cord C-peptide and fetal fat distribution). The resulting recommendation was for a 75-gram GTT for all women (regardless of baseline risk) with levels of greater than 5.1 mmol/L at fasting, 10 mmol/L at one-hour and 8.5 mmol/L at two-hours considered diagnostic.

Despite a WHO statement endorsing the new criteria,<sup>13</sup> there has been a failure of international acceptance to screen for GDM in this way. The National Institute of Clinical Excellence which guides care in the United Kingdom is perhaps the most striking example, recommending only screening those patients with risk factors and using levels of greater than or equal to 5.6

1  
2  
3 mmol/L at fasting and 7.8 mmol/L at two-hours.<sup>9</sup> A sophisticated economic evaluation found  
4 this approach to be superior in their population<sup>14</sup>, and an earlier economic evaluation found  
5 that it was not currently cost-effective to routinely identify pregnant women for  
6 hyperglycaemia<sup>15</sup>. This latter also suggested further research into longer term health-outcomes  
7 of women and babies affected by GDM and more cost-effective ways of treating GDM, a  
8 sentiment reiterated by the findings of our manuscript.  
9  
10

11  
12 Economic evaluations in American populations have also tended to favour existing screening  
13 criteria<sup>16,17,18</sup>, albeit with less robust methodology and with different existing screening  
14 methods to both the UK and Australia. The latest Cochrane review concluded that there is  
15 insufficient evidence to prefer any particular screening method for GDM over another.<sup>19</sup>  
16  
17

18 The new criteria were a major change to established practice in Australia. The abolition of the  
19 non-fasting glucose challenge test (GCT) and the introduction of the one-hour BGL on the GTT  
20 were both new. The fasting BGL was tightened from greater than or equal to 5.5 mmol/L to 5.1  
21 mmol/L and the two-hour level eased from greater than or equal to 8.0 mmol/L to 8.5 mmol/L.  
22 Some studies have tried to examine outcomes in patients who may have been diagnosed with  
23 GDM under the new system but not under the old.<sup>20,21,22</sup> Generally, they have reported groups  
24 at higher risk of adverse outcome (particularly caesarean section and large babies) who may  
25 have been previously underdiagnosed, but such an approach is flawed because of the abolition  
26 of the glucose challenge test and the introduction of the previously untested one-hour BGL. It  
27 thus is not possible to retrospectively examine the outcomes of those who may have had a false  
28 negative on the GCT or those who may have only tested positive on the new one-hour level.  
29 Unfortunately, this is a major inherent weakness in all studies retrospectively examining GDM  
30 when screening is changed (rather than modified) and would only be overcome by a large  
31 prospective study examining two different systems of diagnosis. This would require at least  
32 multi-centre or more likely international collaboration to recruit suitable numbers: a prospect  
33 which seems unlikely given the international disagreement over different diagnostic criteria and  
34 the immense time and planning a trial with somewhat similar methodology (albeit with two  
35 groups for comparison) to the HAPO study would require.  
36  
37  
38  
39  
40

41 A separate approach, one adopted by this study, is to quantify any overall changes in clinical  
42 outcomes and attribute a cost to the increased burden of care and to identify any overall  
43 outcome improvements.  
44  
45

46 The strengths of this study include using a single, large, tertiary centre with a uniform urban  
47 catchment area and relatively stable demographics over the study period. The numbers were  
48 large with over 7000 births per year in each cohort, and the costs of care were quantifiable by  
49 an established institutional Business Performance Reporting Unit. Outcomes were readily  
50 identified from existing data management systems and were usually categorical (often binary)  
51 and not requiring extensive further investigation or statistical analysis.  
52  
53

54 The weaknesses of the study are those always inherent within retrospective data, including the  
55 potential for treatment or ascertainment bias. Retrospectively comparing two large cohorts  
56 with different methodologies for diagnosis will always carry greater uncertainty than usual when  
57  
58  
59

1  
2  
3 compared with well-designed prospective trials. As it is impossible to determine which of the  
4 2014 “screen-negative” cohort would screen-positive under new criteria (and vice-versa), many  
5 assumptions about the background demographic being the same must be made. As we  
6 examined a large cohort, within a single centre, with strict zoning boundaries which did not  
7 change between the two years and with an analysis of all feasibly collected background data,  
8 we have attempted to satisfy the assumption of equal demographics but this will always remain  
9 an uncertainty.  
10  
11

12  
13 We demonstrated a relative increased incidence of GDM of 74%, but we were unable to  
14 demonstrate any statistically significant improvements in major outcomes across the hospital  
15 as a whole. There was possibly a small improvement in the incidence of very large babies  
16 (greater than the 95<sup>th</sup> percentile) but the change was small (0.7%) and there was no change in  
17 babies greater than the 90<sup>th</sup> percentile. An apparent improvement in birth trauma was due to a  
18 change in coding practices (and removed as an outcome), and an improvement in the neonatal  
19 death rate was unexplained but very low in absolute terms (0.2%). This latter tended to be  
20 confined to babies of extreme prematurity born well before routine screening for GDM. It is  
21 important to note that these findings, in a retrospective analysis, may be subject to  
22 unrecognised selection bias or confounding and form part of a larger debate into the care for  
23 women with GDM.  
24  
25  
26

27  
28 It may be reasonable to hypothesise that, with such minimal overall hospital-wide changes, that  
29 it is simply a lower-risk cohort being now diagnosed with GDM. This is somewhat, but not  
30 completely, borne out by analysing the same outcomes in women with GDM before and after  
31 the change. While major outcomes such as caesarean section rates, hypertensive disorders,  
32 pre-term birth and macrosomia have seemingly not changed, there has been a reduction in  
33 third degree tears and a substantial decrease in the number of babies diagnosed with  
34 hypoglycaemia and admitted to SCN. This is suggestive of an increase in diagnoses represented  
35 by women on the milder end of the spectrum of GDM.  
36  
37

38  
39 We have also demonstrated an increase in net costs of over A\$500 000 per annum. This is  
40 primarily due to employing a “high-risk” model of care to all women with GDM. As no overall  
41 changes were discovered in mode of delivery or admission to NICU/SCN, in-patient costs were  
42 not examined. In smaller cohorts, especially those analysed prospectively, it would be  
43 worthwhile to examine patient-level data and directly assign costs of care in both the antenatal  
44 and immediate post-partum period. While the overall costs are seemingly not redeemed in the  
45 short term by marked improved outcomes, there may be unquantified health outcomes  
46 demonstrable in longer term analysis of women with GDM and their babies treated under this  
47 system.  
48  
49

50  
51 While the new criteria are laudable in their efforts at uniformity of diagnosis and adverse  
52 outcome avoidance, and possibly have improved clinical outcomes in sub-groups of women  
53 previously not diagnosed with GDM, there is lack of quality evidence supporting their  
54 superiority over other systems of diagnosis. Thus, further research is needed in three main  
55 areas. Firstly, it would be desirable to have prospective (and ideally randomised controlled trial)  
56 evidence examining the impact of this system of diagnosis over others employed around the  
57  
58  
59

1  
2  
3 world. Secondly, long-term outcomes of the women with GDM and their children may uncover  
4 health benefits not accounted for in immediate analyses like those presented in this study, for  
5 instance with improvements in childhood obesity rates. There may indeed be quantifiable cost  
6 savings that can be compared with the initial increase in costs of care but appropriate  
7 budgetary measures to ensure the initial hospitals of care are adequately reimbursed are  
8 essential. Finally, it is important to investigate more economic ways of antenatally managing  
9 women with GDM particularly in the lower risk group, for example those easily controlled with  
10 simple dietary measures or the increasing use of metformin in those currently being prescribed  
11 insulin.  
12  
13  
14

## 15 **Conclusion**

16  
17  
18 The annual incidence of GDM has immediately and markedly increased due to the change in  
19 diagnostic criteria with an increase in cost of care and with seemingly no clear changes in  
20 immediate clinical outcomes. Most particularly, macrosomia rates (>90<sup>th</sup>%), caesarean section  
21 rates and pre-term birth less than 37 weeks remain unchanged. We suggest that these results  
22 add weight to the need for longer-term data before confirming that HAPO/IADPSG criteria are  
23 superior to other systems of diagnosis. Such data would need to be derived from cohorts  
24 undergoing universal routine screening with these criteria, and quantifiable health benefits  
25 compared against increases in immediate costs of care such as we report here.  
26  
27  
28

## 29 **Declaration of Interests**

30  
31 There were no conflicts of interest with regards to any of the three authors.  
32  
33

## 34 **Contributor and guarantor information**

35 The corresponding author (TC) was responsible for the study design, literature review,  
36 collection and analysis of data, interpretation of clinical findings, writing of the manuscript and  
37 decision for submission. TC is responsible for the overall content and acts as guarantor. SB  
38 supervised the project and contributed to all of the above in a consulting role. AP contributed  
39 to planning and executing appropriate statistical analysis and with interpretation of the data.  
40 All authors contributed to the final manuscript review and final submission.  
41  
42  
43

## 44 **Data Sharing Statement**

45  
46 There are no unpublished data from the study.  
47  
48  
49  
50  
51  
52  
53  
54  
55  
56  
57  
58  
59  
60

### **Role of the funding source**

The Royal Australian and New Zealand College of Obstetrics and Gynaecology, who awarded the Luke Proposch Perinatal Research Scholarship to the corresponding author to financially support this research, had no role in the study design, data collection, analysis and interpretation, writing of the report or decision to submit for publication. The corresponding author had full access to the data in the study and final responsibility for the decision to submit for publication.

### **Transparency Declaration**

The corresponding author (TC) affirms that the manuscript is an honest, accurate, and transparent account of the study being reported and that no important aspects of the study have been omitted.

## Tables

Table 1 1991/1998 ADIPS versus 2014 IADPSG Criteria for diagnosing GDM

|                        | 1991/1998 ADIPS                                                                               |                                               | 2014 IADPSG                                               |                                                                | 2015 NICE                                               |                                                    |
|------------------------|-----------------------------------------------------------------------------------------------|-----------------------------------------------|-----------------------------------------------------------|----------------------------------------------------------------|---------------------------------------------------------|----------------------------------------------------|
|                        | Type of test                                                                                  | Positive criteria                             | Type of test                                              | Positive criteria                                              | Type of test                                            | Positive criteria                                  |
| <b>Screening test</b>  | 50g non-fasting glucose challenge test<br><i>or</i><br>75g non-fasting glucose challenge test | ≥ 7.8mmol/L<br><br>≥ 8.0mmol/L                | Nil                                                       | N/A                                                            | Clinical risk assessment                                | Any one of five clinical risk factors <sup>9</sup> |
| <b>Diagnostic test</b> | 75g, 2-hour fasting glucose tolerance test (two levels)                                       | Fasting ≥ 5.5mmol/L<br><br>2 hour ≥ 8.0mmol/L | 75g, 2-hour fasting glucose tolerance test (three levels) | Fasting ≥ 5.1mmol/L<br>1 hour ≥ 10mmol/L<br>2 hour ≥ 8.5mmol/L | 75g, 2-hour fasting glucose tolerance test (two levels) | Fasting ≥ 5.6mmol/L<br><br>2 hour ≥ 7.8mmol/L      |

Table 2 Demographics of the 2014 and 2016 cohorts

|                          | 2014               | 2016               | p-value       |
|--------------------------|--------------------|--------------------|---------------|
| Total Deliveries         | 7010               | 7488               | n/a           |
| Age (yr)                 | 30.9 (30.8 – 31.0) | 31.2 (31.1 – 31.3) | <b>0.0016</b> |
| BMI (kg.m <sup>2</sup> ) | 24.8 (24.7 – 24.9) | 24.7 (24.6 – 24.8) | 0.28          |
| PCOS                     | 110 (1.57%)        | 151 (2.02%)        | <b>0.043</b>  |
| Smoking                  | 326 (4.65%)        | 303 (4.05%)        | 0.075         |
| Parity ≥ 1               | 3228 (46.1%)       | 3365 (44.9%)       | 0.18          |
| Previous LUSCS           | 960 (13.7%)        | 1027 (13.7%)       | 0.45          |

Table 3 Overall Maternal Outcomes in 2014 and 2016

|                              | 2014         | 2016         | p-value     |
|------------------------------|--------------|--------------|-------------|
| <b>Hypertensive disorder</b> | 332 (4.74%)  | 361 (4.82%)  | 0.81        |
| Induction of labour          | 2407 (34.3%) | 2725 (36.4%) | <b>0.01</b> |
| <b>Overall LUSCS rate</b>    | 1963 (28.0%) | 2070 (27.6%) | 0.63        |
| Emergency LUSCS rate         | 1088 (15.5%) | 1076 (14.3%) | 0.05        |
| Instrumental birth           | 1316 (18.8%) | 1513 (20.2%) | <b>0.03</b> |
| Third degree tear            | 217 (3.1%)   | 197 (2.6%)   | 0.09        |
| PPH                          | 1685 (24.0%) | 1765 (23.6%) | 0.51        |

Table 4 Overall Fetal Outcomes in 2014 and 2016

|                                    | 2014               | 2016               | p-value     |
|------------------------------------|--------------------|--------------------|-------------|
| EGA                                | 38.6 (38.6 – 38.7) | 38.6 (38.5 – 38.6) | 0.18        |
| Stillbirth                         | 36 (0.51%)         | 40 (0.53%)         | 0.86        |
| NND                                | 29 (0.41%)         | 16 (0.21%)         | <b>0.03</b> |
| Hypoglycaemia                      | 154 (2.20%)        | 170 (2.27%)        | 0.77        |
| Respiratory distress               | 140 (2.00%)        | 170 (2.27%)        | 0.26        |
| Jaundice<br>requiring phototherapy | 112 (1.60%)        | 135 (1.80%)        | 0.34        |
| Apgar < 7 at 5 min                 | 280 (3.99%)        | 286 (3.82%)        | 0.59        |
| <b>Birth &lt; 37 weeks</b>         | 645 (9.20%)        | 671 (8.96%)        | 0.62        |
| Birth < 34 weeks                   | 292 (4.17%)        | 325 (4.34%)        | 0.61        |
| Shoulder dystocia                  | 102 (1.46%)        | 131 (1.75%)        | 0.16        |
| Admission to NICU                  | 320 (4.56%)        | 366 (4.89%)        | 0.36        |
| Admission to SCN                   | 534 (7.62%)        | 537 (7.17%)        | 0.31        |
| <b>Birthweight (g)</b>             | 3289 (3274 – 3304) | 3275 (3271 – 3293) | 0.21        |
| Birthweight > 95%                  | 300 (4.31%)        | 269 (3.61%)        | <b>0.03</b> |
| <b>Birthweight &gt; 90%</b>        | 577 (8.28%)        | 586 (7.86%)        | 0.36        |
| Birthweight < 10%                  | 570 (8.18%)        | 616 (8.27%)        | 0.85        |

|  |  |  |  |
|--|--|--|--|
|  |  |  |  |
|--|--|--|--|

*Table 5 Maternal Outcomes of Women with GDM in 2014 compared to 2016*

|                       | 2014        | 2016        | p-value      |
|-----------------------|-------------|-------------|--------------|
| Total                 | 416         | 774         | N/A          |
| Hypertensive disorder | 20 (4.80%)  | 35 (4.52%)  | 0.85         |
| Induction of labour   | 204 (49.0%) | 379 (49.0%) | 0.98         |
| Overall LUSCS rate    | 162 (38.9%) | 289 (37.3%) | 0.59         |
| Emergency LUSCS rate  | 71 (17.1%)  | 121 (15.6%) | 0.52         |
| Instrumental birth    | 83 (20.0%)  | 134 (17.3%) | 0.26         |
| Third degree tear     | 22 (5.29%)  | 20 (2.58%)  | <b>0.016</b> |
| PP H                  | 121 (29.1%) | 205 (26.5%) | 0.34         |

*Table 6 Fetal Outcomes of Women with GDM in 2014 compared to 2016*

|                                 | 2014               | 2016               | p-value      |
|---------------------------------|--------------------|--------------------|--------------|
| EGA                             | 37.8 (37.6 – 38.1) | 38.0 (37.9 – 38.2) | 0.13         |
| Stillbirth                      | 5 (1.20%)          | 3 (0.39%)          | 0.10         |
| NND                             | 0.00%              | 1 (0.13%)          | N/A          |
| Hypoglycaemia                   | 40 (9.62%)         | 46 (5.94%)         | <b>0.02</b>  |
| Respiratory distress            | 11 (2.64%)         | 12 (1.55%)         | 0.19         |
| Jaundice requiring phototherapy | 9 (2.16%)          | 12 (1.55)          | 0.44         |
| Apgar < 7 at 5 mins             | 19 (4.57%)         | 26 (3.36%)         | 0.30         |
| Birth < 37 weeks                | 51 (12.3%)         | 83 (10.7%)         | 0.42         |
| Birth < 34 weeks                | 25 (6.01%)         | 30 (3.88%)         | 0.10         |
| Shoulder dystocia               | 7 (1.68%)          | 5 (0.65%)          | 0.09         |
| Admission to NICU               | 27 (6.49%)         | 39 (5.04%)         | 0.30         |
| Admission to SCN                | 52 (12.5%)         | 60 (7.75%)         | <b>0.007</b> |

|                   |                    |                    |      |
|-------------------|--------------------|--------------------|------|
| Birthweight       | 3151 (3089 – 3213) | 3207 (3167 – 3248) | 0.12 |
| Birthweight > 95% | 27 (6.49%)         | 35 (4.52%)         | 0.15 |
| Birthweight > 90% | 48 (11.5%)         | 74 (9.56%)         | 0.28 |
| Birthweight < 10% | 38 (9.13%)         | 60 (7.75%)         | 0.41 |

## References

- ADIPS Consensus Guidelines for the Testing and Diagnosis of Hyperglycaemia in Pregnancy in Australia and New Zealand. [www.adips.org.au](http://www.adips.org.au) (accessed January 2018). 2014.
- Metzger BE, Gabbe SG, Persson B, et al. International association of diabetes and pregnancy study groups recommendations on the diagnosis and classification of hyperglycemia in pregnancy. *Diabetes Care*. 2010;33:676-82
- Metzger BE, Lowe LP, Dyer AR, et al. Hyperglycemia and adverse outcomes. *N Engl J Med*. 2008;358:1991-2002
- Martin FI, Vogue A, Dargaville R, et al. The diagnosis of gestational diabetes. *Med J Aust*. 1991;155:112
- Hoffman L, Nolan C, Wilson JD, Oats JJ, Simmons D. Gestational diabetes mellitus--management guidelines. The Australasian Diabetes in Pregnancy Society. *Med J Aust*. 1998;169:93-7
- Moses RG, Morris GJ, Petocz P, San Gil F, Garg D. The impact of potential new diagnostic criteria on the prevalence of gestational diabetes mellitus in Australia. *Med J Aust*. 2011;194:338-40.
- Wong VW, Lin A, Russell H. Adopting the new World Health Organization diagnostic criteria for gestational diabetes: How the prevalence changes in a high-risk region in Australia. *Diabetes Res Clin Pract*. 2017;129:148-53
- Flack JR, Ross GP. Survey on testing for gestational diabetes mellitus in Australia. *Aust N Z J Obstet Gynaecol*. 2016;56:346-8
- National Institute for Health and Care Excellence. <https://pathways.nice.org.uk/pathways/diabetes-in-pregnancy> 2016 (accessed January 2018).
- American Diabetes Association. Classification and Diagnosis of Diabetes. *Diabetes Care*. 2016;39 Suppl 1:S13-22
- Canadian Diabetes Association Clinical Practice Guidelines Expert Committee. Thompson D, Berger H, Feig D, et al. Diabetes and pregnancy. *Can J Diabetes*. 2013;37 Suppl 1:S168-83
- Dobbins TA, Sullivan EA, Roberts CL, Simpson JM. Australian National Birthweight Percentiles by Sex and Gestational Age, 1998-2007. *MJA*. 2012;197:291-4
- Diagnostic criteria and classification of hyperglycemia first detected in pregnancy: a World Health Organization Guideline. *Diabetes Res Clin Pract*. 2014;103:341-63
- Jacklin PB, Maresh MJ, Patterson CC, Stanley KP, Dornhorst A, Burman-Roy S, et al. A cost-effectiveness comparison of the NICE 2015 and WHO 2013 diagnostic criteria for

women with gestational diabetes with and without risk factors. *BMJ Open*. 2017;7:e016621

15. Farrar D, Simmonds M, Griffin S, et al. The identification and treatment of women with hyperglycaemia in pregnancy: an analysis of individual participant data, systematic reviews, meta-analyses and an economic evaluation. *HTA* 2016;20:86.
16. Basevi V, Di Mario S, Morciano C, Nonino F, Magrini N. Comment on: American Diabetes Association. Standards of medical care in diabetes--2011. *Diabetes Care* 2011;34(Suppl. 1):S11-S61. *Diabetes Care*. 2011;34:e53
17. Ohno MS, Sparks TN, Cheng YW, Caughey AB. Treating mild gestational diabetes mellitus: a cost-effectiveness analysis. *Am J Obstet Gynecol*. 2011;205:282 e1-7
18. Lee GT, Satyan MT, Grothusen JD, et al. A retrospective study comparing outcomes in a midwestern US population after introduction of IADPSG guidelines for gestational diabetes. *The journal of maternal-fetal & neonatal medicine*. 2017:1-6
19. Farrar D, Duley L, Dowswell T, Lawlor DA. Different strategies for diagnosing gestational diabetes to improve maternal and infant health. *Cochrane Database Syst Rev*. 2017;8:CD007122
20. Laafira A, White SW, Griffin CJ, Graham D. Impact of the new IADPSG gestational diabetes diagnostic criteria on pregnancy outcomes in Western Australia. *Aust N Z J Obstet Gynaecol*. 2016;56:36-41
21. Jiang S, Chipps D, Cheung WN, Mongelli M. Comparison of adverse pregnancy outcomes based on the new IADPSG 2010 gestational diabetes criteria and maternal body mass index. *Aust N Z J Obstet Gynaecol*. 2017;57:533-9
22. Abell SK, Teede HJ. The IADPSG diagnostic criteria identify women with increased risk of adverse pregnancy outcomes in Victoria. *Aust N Z J Obstet Gynaecol*. 2017;57:564-8

STROBE Statement—Checklist of items that should be included in reports of *cohort studies*

|                              | Item No | Recommendation                                                                                                                                                                                                                                                                                                                                                                                                                                                                                                                                         |
|------------------------------|---------|--------------------------------------------------------------------------------------------------------------------------------------------------------------------------------------------------------------------------------------------------------------------------------------------------------------------------------------------------------------------------------------------------------------------------------------------------------------------------------------------------------------------------------------------------------|
| <b>Title and abstract</b>    | 1       | (a) Indicate the study's design with a commonly used term in the title or the abstract <b>Yes (page 1)</b><br>(b) Provide in the abstract an informative and balanced summary of what was done and what was found <b>Yes (page 2)</b>                                                                                                                                                                                                                                                                                                                  |
| <b>Introduction</b>          |         |                                                                                                                                                                                                                                                                                                                                                                                                                                                                                                                                                        |
| Background/rationale         | 2       | Explain the scientific background and rationale for the investigation being reported <b>Yes (page 3)</b>                                                                                                                                                                                                                                                                                                                                                                                                                                               |
| Objectives                   | 3       | State specific objectives, including any prespecified hypotheses <b>Yes (page 3)</b>                                                                                                                                                                                                                                                                                                                                                                                                                                                                   |
| <b>Methods</b>               |         |                                                                                                                                                                                                                                                                                                                                                                                                                                                                                                                                                        |
| Study design                 | 4       | Present key elements of study design early in the paper <b>Yes (page 3-4)</b>                                                                                                                                                                                                                                                                                                                                                                                                                                                                          |
| Setting                      | 5       | Describe the setting, locations, and relevant dates, including periods of recruitment, exposure, follow-up, and data collection <b>Yes (page 3)</b>                                                                                                                                                                                                                                                                                                                                                                                                    |
| Participants                 | 6       | (a) Give the eligibility criteria, and the sources and methods of selection of participants. Describe methods of follow-up <b>Yes – no exclusion criteria (page 3)</b><br>(b) For matched studies, give matching criteria and number of exposed and unexposed <b>N/A</b>                                                                                                                                                                                                                                                                               |
| Variables                    | 7       | Clearly define all outcomes, exposures, predictors, potential confounders, and effect modifiers. Give diagnostic criteria, if applicable <b>Yes (page 4)</b>                                                                                                                                                                                                                                                                                                                                                                                           |
| Data sources/<br>measurement | 8*      | For each variable of interest, give sources of data and details of methods of assessment (measurement). Describe comparability of assessment methods if there is more than one group <b>Yes (page 4)</b>                                                                                                                                                                                                                                                                                                                                               |
| Bias                         | 9       | Describe any efforts to address potential sources of bias <b>Yes (page 4 and 7)</b>                                                                                                                                                                                                                                                                                                                                                                                                                                                                    |
| Study size                   | 10      | Explain how the study size was arrived at <b>Yes (entire cohort, page 4)</b>                                                                                                                                                                                                                                                                                                                                                                                                                                                                           |
| Quantitative variables       | 11      | Explain how quantitative variables were handled in the analyses. If applicable, describe which groupings were chosen and why <b>Yes (page 4)</b>                                                                                                                                                                                                                                                                                                                                                                                                       |
| Statistical methods          | 12      | (a) Describe all statistical methods, including those used to control for confounding <b>Yes, confounding not particularly relevant as outcomes were examined across whole cohorts (page 4-5)</b><br>(b) Describe any methods used to examine subgroups and interactions <b>N/A (no subgroups)</b><br>(c) Explain how missing data were addressed <b>N/A (nil was missing)</b><br>(d) If applicable, explain how loss to follow-up was addressed <b>N/A (nil lost to follow-up)</b><br>(e) Describe any sensitivity analyses <b>N/A (not required)</b> |
| <b>Results</b>               |         |                                                                                                                                                                                                                                                                                                                                                                                                                                                                                                                                                        |
| Participants                 | 13*     | (a) Report numbers of individuals at each stage of study—eg numbers potentially eligible, examined for eligibility, confirmed eligible, included in the study, completing follow-up, and analysed <b>Yes (page 5)</b><br>(b) Give reasons for non-participation at each stage <b>N/A (retrospective analysis with no possibility for non-participation)</b><br>(c) Consider use of a flow diagram <b>Not used</b>                                                                                                                                      |
| Descriptive data             | 14*     | (a) Give characteristics of study participants (eg demographic, clinical, social) and information on exposures and potential confounders <b>Yes (page 5 and Table 2)</b><br>(b) Indicate number of participants with missing data for each variable of interest <b>Nil missing</b>                                                                                                                                                                                                                                                                     |

|                          |     |                                                                                                                                                                                                                                                                                                                                                                                                                                                                       |
|--------------------------|-----|-----------------------------------------------------------------------------------------------------------------------------------------------------------------------------------------------------------------------------------------------------------------------------------------------------------------------------------------------------------------------------------------------------------------------------------------------------------------------|
|                          |     | (c) Summarise follow-up time (eg, average and total amount) <b>N/A (examined at time of delivery – no long-term follow up)</b>                                                                                                                                                                                                                                                                                                                                        |
| Outcome data             | 15* | Report numbers of outcome events or summary measures over time <b>Yes (page 5-6)</b>                                                                                                                                                                                                                                                                                                                                                                                  |
| Main results             | 16  | (a) Give unadjusted estimates and, if applicable, confounder-adjusted estimates and their precision (eg, 95% confidence interval). Make clear which confounders were adjusted for and why they were included <b>Yes (page 5-6, tables 3-4)</b><br>(b) Report category boundaries when continuous variables were categorized <b>N/A</b><br>(c) If relevant, consider translating estimates of relative risk into absolute risk for a meaningful time period <b>N/A</b> |
| Other analyses           | 17  | Report other analyses done—eg analyses of subgroups and interactions, and sensitivity analyses <b>N/A</b>                                                                                                                                                                                                                                                                                                                                                             |
| <b>Discussion</b>        |     |                                                                                                                                                                                                                                                                                                                                                                                                                                                                       |
| Key results              | 18  | Summarise key results with reference to study objectives <b>Yes (page 6-7)</b>                                                                                                                                                                                                                                                                                                                                                                                        |
| Limitations              | 19  | Discuss limitations of the study, taking into account sources of potential bias or imprecision. Discuss both direction and magnitude of any potential bias <b>Yes (page 7)</b>                                                                                                                                                                                                                                                                                        |
| Interpretation           | 20  | Give a cautious overall interpretation of results considering objectives, limitations, multiplicity of analyses, results from similar studies, and other relevant evidence <b>Yes (page 7-8)</b>                                                                                                                                                                                                                                                                      |
| Generalisability         | 21  | Discuss the generalisability (external validity) of the study results <b>Yes (page 8)</b>                                                                                                                                                                                                                                                                                                                                                                             |
| <b>Other information</b> |     |                                                                                                                                                                                                                                                                                                                                                                                                                                                                       |
| Funding                  | 22  | Give the source of funding and the role of the funders for the present study and, if applicable, for the original study on which the present article is based <b>Yes (page 8)</b>                                                                                                                                                                                                                                                                                     |

\*Give information separately for exposed and unexposed groups.

**Note:** An Explanation and Elaboration article discusses each checklist item and gives methodological background and published examples of transparent reporting. The STROBE checklist is best used in conjunction with this article (freely available on the Web sites of PLoS Medicine at <http://www.plosmedicine.org/>, Annals of Internal Medicine at <http://www.annals.org/>, and Epidemiology at <http://www.epidem.com/>). Information on the STROBE Initiative is available at <http://www.strobe-statement.org>.

# BMJ Open

## Implications of the introduction of new criteria for the diagnosis of gestational diabetes: a health outcome and cost of care analysis

|                                 |                                                                                                                                                                                                                                                                                                                                                                             |
|---------------------------------|-----------------------------------------------------------------------------------------------------------------------------------------------------------------------------------------------------------------------------------------------------------------------------------------------------------------------------------------------------------------------------|
| Journal:                        | <i>BMJ Open</i>                                                                                                                                                                                                                                                                                                                                                             |
| Manuscript ID                   | bmjopen-2018-023293.R4                                                                                                                                                                                                                                                                                                                                                      |
| Article Type:                   | Research                                                                                                                                                                                                                                                                                                                                                                    |
| Date Submitted by the Author:   | 07-Nov-2018                                                                                                                                                                                                                                                                                                                                                                 |
| Complete List of Authors:       | Cade, Thomas; Royal Women's Hospital, Pregnancy Research Centre; University of Melbourne, Obstetrics and Gynaecology<br>Polyakov, Alexander; Royal Women's Hospital, Reproductive Services; University of Melbourne, Obstetrics and Gynaecology<br>Brennecke, Shaun; Royal Women's Hospital, Pregnancy Research Centre; University of Melbourne, Obstetrics and Gynaecology |
| <b>Primary Subject Heading</b>: | Obstetrics and gynaecology                                                                                                                                                                                                                                                                                                                                                  |
| Secondary Subject Heading:      | Diabetes and endocrinology                                                                                                                                                                                                                                                                                                                                                  |
| Keywords:                       | OBSTETRICS, Maternal medicine < OBSTETRICS, Fetal medicine < OBSTETRICS                                                                                                                                                                                                                                                                                                     |
|                                 |                                                                                                                                                                                                                                                                                                                                                                             |

SCHOLARONE™  
Manuscripts

# Implications of the introduction of new criteria for the diagnosis of gestational diabetes: a health outcome and cost of care analysis

Thomas J Cade<sup>1,2,3</sup>

Alexander Polyakov<sup>3,4</sup>

Shaun P Brennecke<sup>2,3</sup>

1. Diabetes Service, Royal Women's Hospital, Parkville, Victoria, Australia
2. Pregnancy Research Service, Department of Maternal Fetal Medicine, Royal Women's Hospital, Parkville, Victoria, Australia
3. Department of Obstetrics and Gynaecology, University of Melbourne, Parkville, Victoria, Australia
4. Department of Reproductive Biology, Royal Women's Hospital, Parkville, Victoria, Australia

Corresponding author: Dr Thomas Cade, Royal Women's Hospital, 20 Flemington Rd, Parkville, 3052, Australia.  
Email: [tom.cade@thewomens.org.au](mailto:tom.cade@thewomens.org.au) telephone +61 3 83452000

Word Count: 2719

## Abstract

### *Objective*

To identify effects on health outcomes from implementing new criteria diagnosing gestational diabetes (GDM) and to analyse costs-of-care associated with this change.

### *Design*

Quasi-experimental study comparing data from the calendar year before (2014) and after (2016) the change.

### *Setting*

Single, tertiary level, university-affiliated, maternity hospital.

### *Participants*

All women giving birth in the hospital, excluding those with pre-existing diabetes or multiple pregnancy.

### *Main outcome measures*

Primary outcomes were caesarean section, birthweight > 90<sup>th</sup> percentile for gestation, hypertensive disorder of pregnancy and pre-term birth less than 37 weeks. A number of secondary outcomes reported to be associated with GDM were also analysed were also analysed.

Care packages were derived for those without GDM, diet-controlled GDM and GDM requiring insulin. The Institutional Business Reporting Unit data for average occasions of service, pharmacy schedule for the costs of consumables and medications, and Medicare Benefits Schedule ultrasound services were used for costing each package. All costs were estimated in figures from the end of 2016 negating the need to adjust for Consumer Price Index increases.

### *Results*

There was an increase in annual incidence of GDM of 74% without overall improvements in primary health outcomes. This incurred a net cost increase of \$560 093. Babies of women with GDM had lower rates of neonatal hypoglycaemia and special care nursery admissions after the change, suggesting a milder spectrum of disease.

### *Conclusion*

New criteria for the diagnosis of GDM have increased the incidence of GDM and the overall cost of GDM care. Without obvious changes in short-term outcomes, validation over other systems of diagnosis may require longer-term studies in cohorts utilising universal screening and treatment under these criteria.

### Strengths and limitations of this study

- Australia is one of the only major Western countries to introduce universal screening for GDM by new International Association of Diabetes in Pregnancy Study Group criteria and is uniquely poised to assess concerns about increased annual incidence and costs of care compared to any potential improvement in health outcomes.
- Concerns about an increase in diagnoses and “over-medicalisation” of women who erstwhile would have been considered normal have given many countries reason for caution in adopting the new criteria. Our findings may assist in decision making regarding public health policy, albeit with findings applicable to clinical policy change within a single large centre. It may also highlight the need for longer-term follow-up of women with GDM and their babies treated under this system.
- As with any large retrospective audit, there are potential methodological flaws in data analysis, including unrecognised selection bias and confounding. We have assessed the implication of adopting this criteria on a large entire cohort (not a specific subgroup) in an attempt to assess outcomes and costs as a surrogate for public health policy “en masse”. Findings should be interpreted with respect to clinical policy change within a single centre and add to the debate about adopting this policy on a wider public scale.
- A major problem with assessing changes in diagnostic criteria in GDM lies within being unable to retrospectively identify those who were potentially underdiagnosed under older systems and assess their outcomes. We have thus assessed the impact on a large tertiary hospital as a whole and quantified the costs associated with the increased burden or care.

## Introduction

Diagnostic criteria for gestational diabetes (GDM) in Australia changed following a 2014 consensus statement by the Australian Diabetes in Pregnancy Society (ADIPS)<sup>1</sup> ratifying support for the International Association of Diabetes in Pregnancy Study Group's recommendations<sup>2</sup> (see table 1). These, in turn, used data from the Hyperglycaemia and Adverse Pregnancy Outcome (HAPO) study,<sup>3</sup> which was a large, prospective, observational study examining the influence of increasing blood glucose levels on a fasting glucose tolerance test on eventual adverse pregnancy outcome.

Previously, diagnostic criteria for GDM in Australia were derived from an earlier ADIPS consensus statement published in 1991<sup>4</sup> and re-endorsed in 1998<sup>5</sup> (see Table 1). It was based on the observed distributions of blood glucose levels tested in pregnant women at various maternity centres. These older criteria had been widely utilised for the last two decades in many Australian maternity centres including our own.

(Table 1 goes about here).

Since the introduction of the new criteria, concerns have focussed on the anticipated increase in annual incidence of GDM that these new criteria will cause and the resultant implications for workload. Early estimates of an annual increase of 35%<sup>6</sup> were followed by later data suggesting an almost doubling in some populations.<sup>7</sup> Although many major maternity centres in Australia have adopted the new criteria, a 2016 survey found variable adoption in Australia<sup>8</sup> and the criteria have not yet found international acceptance despite WHO endorsement.<sup>9, 10, 11</sup>

While it was never the intention of the HAPO authors to suggest a specific annual incidence for GDM, it is important to remember that the new criteria and the suggested relative risk reductions were derived from an untreated population. They were not derived from comparing the new criteria to any other existing methods of diagnosis. While the change may be important for uniformity in diagnosis and may result in clinically important outcomes in individuals previously not diagnosed with GDM, it is also important to assess whether any improvements are seen across large populations and, if so, whether they justify any increase in costs-of-care.

We aimed to estimate the impact of this change in a large tertiary maternity hospital by examining two pre-screening cohorts of pregnant women immediately before and immediately after the new criteria were adopted. Specifically, we wished to examine the increase in annual incidence of GDM, assign an appropriate cost-of-care to the high-risk model employed for GDM and compare this to any hospital-wide change in the HAPO outcomes upon which the new criteria are based.

## Patients and Methods

As the new criteria for diagnosing GDM were introduced in our hospital in mid 2015, we selected 2014 as the last full calendar year of diagnosis under 1991/1998 ADIPS criteria<sup>4,5</sup> and 2016 as the first full year of diagnosis under the new IADPSG criteria.<sup>2</sup> All women having care and delivering within the hospital were included for analysis, with exclusion limited

1  
2  
3 only to pre-existing diabetes (i.e. those who did not undergo screening for GDM) and  
4 multiple pregnancy (an exclusion criterion in the HAPO trial). Women in Australia have  
5 universal screening for GDM between 24 and 28 weeks.  
6  
7

8 Clinical care during the periods of study was divided into three groups: those without GDM,  
9 GDM managed with dietary measures, and GDM requiring insulin. For occasions of clinical  
10 review, such as antenatal clinic consultations, group class and phone-call consultations, and  
11 pregnancy day care admissions, cost was estimated from “average occasion of service”  
12 figures for the relevant health professional, as collected by the institutional Business  
13 Performance Reporting Unit. The pharmacy schedule was consulted for the costs of  
14 consumables and medications. The Medicare Benefits Schedule was considered the most  
15 reproducible and valid estimation for the cost of ultrasound services. All costs were  
16 estimated in figures from the end of 2016, thus negating the need to adjust 2014 figures for  
17 consumer price index (CPI) or other potential inflationary changes.  
18  
19  
20

21 Costs of in-patient care in our hospital consist mainly of “bed-days” for the mother  
22 (increased mainly by caesarean section compared to vaginal birth) or admissions to special  
23 care nursery or neonatal intensive care for the infant. In-patient costs were to be assessed if  
24 any differences were found in these two outcomes. The only difference in care for women  
25 with GDM compared to those without was a self-collected bi-daily BGL for one to two days  
26 which was not deemed a significant enough cost for quantification.  
27  
28  
29

30 Women diagnosed with GDM receive a three-hour group class with a diabetes educator,  
31 dietician and physiotherapist. In addition, most have a follow-up one-on-one session with a  
32 dietician, phone consultations with diabetes educators, two extra antenatal clinics,  
33 assessment by consultant obstetricians rather than by midwives or junior medical staff, and  
34 a growth ultrasound. They also require a glucometer and testing strips.  
35  
36

37 If dietary measures fail to control blood glucose levels (BGLs) at acceptable levels, they also  
38 require insulin, a one-on-one session with a diabetes educator, an extra antenatal clinic,  
39 often a second growth scan and sometimes fetal heart rate monitoring via cardiotocography  
40 (CTG).  
41  
42

43 Demographic data were collected for each group, including age, body mass index (BMI), pre-  
44 existing polycystic ovarian syndrome (PCOS), smoking, parity and previous caesarean  
45 section (LUSCS).  
46  
47

48 Primary outcomes were those upon which the new criteria were based, namely caesarean  
49 section rates, hypertensive disorder of pregnancy, birthweight greater than the 90<sup>th</sup>  
50 percentile, pre-term birth less than 37 weeks.<sup>2</sup>  
51  
52

53 Additional maternal outcomes were induction of labour, instrumental birth, third degree  
54 tear and post-partum haemorrhage. Additional fetal outcomes were greater than the 95<sup>th</sup>  
55 percentile, less than the 10<sup>th</sup> percentile, admission to special care nursery (SCN) or neonatal  
56 intensive care (NICU), estimated gestational age, pre-term birth less than 34 weeks,  
57 respiratory distress, jaundice requiring phototherapy, hypoglycaemia, stillbirth, neonatal  
58 death, and Apgar score less than 7 at 5 minutes. Birth trauma was initially included as an  
59 outcome but subsequently removed due to a change in coding practices midway through  
60 the study period which artificially lowered overall recorded rates.

1  
2  
3  
4 Neonatal birthweights were plotted by percentile as described by the latest Australian birth  
5 charts.<sup>12</sup> Neonatal hypoglycaemia was defined as any ward-measured BGL less than 2.6  
6 mmol/L.  
7  
8

9 Maternal and neonatal outcomes were examined for the entire hospital cohort (to examine  
10 the change as a hospital health policy) and for just women diagnosed with GDM in 2014  
11 (before the change) compared to those in 2016 (after the change).  
12  
13

14 Data were collected prospectively by the institutional Quality and Safety Unit from the  
15 Maternity Care Information System ("MCIS", GE Healthcare, Little Chalfont, UK) and  
16 collated in MS Excel spreadsheets (Microsoft, Redmond, USA). Data were analysed after  
17 selecting the demographics and outcomes of interest. Maternal and neonatal  
18 characteristics were compared using descriptive statistics. Discrete variables are reported in  
19 the tables as total numbers with percentage in parentheses and continuous variables are  
20 reported as the mean with 95% confidence intervals in parentheses. For univariate analyses,  
21 discrete variables were analysed using Fisher's exact test or Pearson's chi-squared test and  
22 continuous variables using Student's t-test. Multivariate analysis with logistic regression was  
23 planned for any outcome which met statistical and clinical significance and had documented  
24 risk factors other than GDM. P-values are reported in the final column of all tables with less  
25 than 0.05 considered statistically significant and highlighted in bold. Statistical analysis was  
26 performed using STATA 9.2 (StataCorp, Texas, USA).  
27  
28  
29  
30

31 The study was approved as an anonymised audit by the Institutional Research and Ethics  
32 Committee with identifying information removed before analysis.  
33  
34

### 35 *Patient and Public Involvement*

36  
37 This was an anonymised retrospective audit, thus patients and the public were not required  
38 to be directly involved in recruitment or conduct of the study. Indeed, emphasis was given  
39 toward assessing the implications of this clinical health policy on a patient cohort as a whole  
40 rather than subgroup or individual outcomes.  
41  
42

## 43 **Results**

### 44 *Demographics and Health Outcomes*

45  
46 In 2014, there were 7010 pregnant women of whom 416 were diagnosed with GDM  
47 (incidence 5.93%) and in 2016, there were 7488 pregnant women of whom 774 were  
48 diagnosed with GDM (incidence 10.3%). The demographics of the two cohorts are shown in  
49 Table 2.  
50  
51  
52

53  
54 (Table 2 goes about here).  
55  
56

57 Although the second cohort was statistically significantly older, this was only by a mean of  
58 four months. The diagnosis of PCOS was higher but overall rates were low and possibly  
59 under-reported. These two findings were statistically significant but unlikely to be clinically  
60 relevant. The relative increase of 73.7% in the annual incidence of GDM is most likely  
attributable to the change in diagnosis rather than to any changed demographic factors.

The maternal outcomes for the entire cohort are shown in Table 3 and the fetal outcomes in Table 4, with the HAPO/IADPSG outcomes highlighted in bold.

(Tables 3 and 4 go about here).

Following the introduction of the new GDM criteria, there has not appeared to be a hospital-wide decrease in the main outcomes reported in the sub-analysis of the HAPO study, most particularly in birthweight >90<sup>th</sup> percentile for gestation, caesarean section, hypertensive disorder of pregnancy or pre-term birth <37 weeks. However, there has been a hospital-wide decrease in neonatal death and birthweight greater than the 95<sup>th</sup> percentile in the fetal outcomes and an increase in induction of labour and instrumental birth in the maternal outcomes. The decrease in neonatal death rates was unexplained, almost always occurs at the extreme of prematurity and the absolute difference was low at 0.2%. The change most likely attributable to tightening GDM diagnoses is a small reduction in very large babies.

The maternal and fetal outcomes for the women with GDM are shown in Tables 5 and 6 respectively. There was a reduction in the annual incidence of third degree tears from 5.29% to 2.58% in the mothers with GDM. There was also a reduction in the incidence of neonatal hypoglycaemia (from 9.62% to 5.94%) and admissions to special care nursery (from 12.5% to 7.75%).

(Tables 5 and 6 go about here)

### *Costs of care*

The average antenatal care package for women without GDM costs \$923 and for the 15% that require post-dates care this is \$1742 (when extra clinics, and CTG and amniotic fluid monitoring are required). The care package for women with GDM who do not need insulin is \$2026 and for those that do need insulin is \$2534 (or \$3826 if CTG monitoring from 36 weeks is undertaken: on audit during the study period, this occurred in 50% of patients).

In 2014, 210 women with GDM were controlled with dietary measures and 206 required insulin. The costs of care for GDM was calculated as follows:

GDM diet controlled:  $210 \times \$2026 = \$425\ 460$

GDM insulin controlled:  $0.5 \times 206 \times \$2534 + 0.5 \times 206 \times \$3826 = \$655\ 080$

**Total = \$1 080 540**

In 2016, 413 women with GDM were controlled with dietary measures and 361 required insulin. The costs of care for GDM was calculated as follows:

GDM diet controlled:  $413 \times \$2026 = \$836\ 738$

GDM insulin controlled:  $0.5 \times 361 \times \$2534 + 0.5 \times 361 \times \$3826 = \$1\ 147\ 980$

**Total = \$1 984 718**

The gross cost increase for care of women with GDM was thus \$904 178. The net cost increase can be determined by attributing the cost of standard care to the excess diagnoses

of GDM. If we round the incidence of GDM in 2014 up to 6% and use this with the total number of deliveries in 2016 (n=7420), the approximate number of women diagnosed with GDM if the criteria did not change would have been:  $0.06 \times 7420 = 445$ . The approximate excess number of cases of GDM is the total in 2016 (n = 774) minus this figure (n = 445) which is:  $774 - 445 = 329$ . We can then apply this number to routine care (bearing in mind 15% of those undergoing routine care require post-dates monitoring) as follows:

$$0.85 \times 329 \times \$923 + 0.15 \times 329 \times \$1742 = \$344\,085$$

The net cost, which represents the change in antenatal resources, is then the gross cost increase minus this figure:

$$\$904\,178 - \$344\,085 = \$560\,093$$

The hospital has thus spent approximately **\$560 093** caring for women with GDM because of the change in criteria.

## Discussion

HAPO<sup>3</sup> was a landmark study for several reasons, namely its sheer size (over 25 000 pregnant women), its robust statistical methods, and its aim to unify disparate international views about the significance of GDM and the best way to diagnose it. The IADPSG sub-analysis<sup>2</sup> used important clinical outcomes in identifying a “best-fit” for cut-off values within the 75-gram glucose tolerance test (GTT) to diagnose GDM: most are routinely measured in clinical care (with the exception of cord C-peptide and fetal fat distribution). The resulting recommendation was for a 75-gram GTT for all women (regardless of baseline risk) with levels of greater than 5.1 mmol/L at fasting, 10 mmol/L at one-hour and 8.5 mmol/L at two-hours considered diagnostic.

Despite a WHO statement endorsing the new criteria,<sup>13</sup> there has been a failure of international acceptance to screen for GDM in this way. The National Institute of Clinical Excellence which guides care in the United Kingdom is perhaps the most striking example, recommending only screening those patients with risk factors and using levels of greater than or equal to 5.6 mmol/L at fasting and 7.8 mmol/L at two-hours.<sup>9</sup> A sophisticated economic evaluation found this approach to be superior in their population<sup>14</sup>, and an earlier economic evaluation found that it was not currently cost-effective to routinely identify pregnant women for hyperglycaemia<sup>15</sup>. This latter also suggested further research into longer term health-outcomes of women and babies affected by GDM and more cost-effective ways of treating GDM, a sentiment reiterated by the findings of our manuscript.

Economic evaluations in American populations have also tended to favour existing screening criteria<sup>16,17,18</sup>, albeit with less robust methodology and with different existing screening methods to both the UK and Australia. The latest Cochrane review concluded that there is insufficient evidence to prefer any particular screening method for GDM over another.<sup>19</sup>

The new criteria were a major change to established practice in Australia. The abolition of the non-fasting glucose challenge test (GCT) and the introduction of the one-hour BGL on the GTT were both new. The fasting BGL was tightened from greater than or equal to 5.5 mmol/L to 5.1 mmol/L and the two-hour level eased from greater than or equal to 8.0 mmol/L to 8.5 mmol/L. Some studies have tried to examine outcomes in patients who may

1  
2  
3 have been diagnosed with GDM under the new system but not under the old.<sup>20,21,22</sup>  
4 Generally, they have reported groups at higher risk of adverse outcome (particularly  
5 caesarean section and large babies) who may have been previously underdiagnosed, but  
6 such an approach is flawed because of the abolition of the glucose challenge test and the  
7 introduction of the previously untested one-hour BGL. It thus is not possible to  
8 retrospectively examine the outcomes of those who may have had a false negative on the  
9 GCT or those who may have only tested positive on the new one-hour level. Unfortunately,  
10 this is a major inherent weakness in all studies retrospectively examining GDM when  
11 screening is changed (rather than modified) and would only be overcome by a large  
12 prospective study examining two different systems of diagnosis. This would require at least  
13 multi-centre or more likely international collaboration to recruit suitable numbers: a  
14 prospect which seems unlikely given the international disagreement over different  
15 diagnostic criteria and the immense time and planning a trial with somewhat similar  
16 methodology (albeit with two groups for comparison) to the HAPO study would require.  
17  
18  
19  
20

21 A separate approach, one adopted by this study, is to quantify any overall changes in clinical  
22 outcomes and attribute a cost to the increased burden of care and and to identify any  
23 overall outcome improvements.  
24  
25

26 The strengths of this study include using a single, large, tertiary centre with a uniform urban  
27 catchment area and relatively stable demographics over the study period. The numbers  
28 were large with over 7000 births per year in each cohort, and the costs of care were  
29 quantifiable by an established institutional Business Performance Reporting Unit. Outcomes  
30 were readily identified from existing data management systems and were usually  
31 categorical (often binary) and not requiring extensive further investigation or statistical  
32 analysis.  
33  
34  
35

36 The weaknesses of the study are those always inherent within retrospective data, including  
37 the potential for treatment or ascertainment bias. Retrospectively comparing two large  
38 cohorts with different methodologies for diagnosis will always carry greater uncertainty than  
39 usual when compared with well-designed prospective trials. As it is impossible to determine  
40 which of the 2014 “screen-negative” cohort would screen-positive under new criteria (and  
41 vice-versa), many assumptions about the background demographic being the same must be  
42 made. As we examined a large cohort, within a single centre, with strict zoning boundaries  
43 which did not change between the two years and with an analysis of all feasibly collected  
44 background data, we have attempted to satisfy the assumption of equal demographics but  
45 this will always remain an uncertainty.  
46  
47  
48  
49

50 We demonstrated a relative increased incidence of GDM of 74%, but we were unable to  
51 demonstrate any statistically significant improvements in major outcomes across the  
52 hospital as a whole. There was possibly a small improvement in the incidence of very large  
53 babies (greater than the 95<sup>th</sup> percentile) but the change was small (0.7%) and there was no  
54 change in babies greater than the 90<sup>th</sup> percentile. An apparent improvement in birth trauma  
55 was due to a change in coding practices (and removed as an outcome), and an improvement  
56 in the neonatal death rate was unexplained but very low in absolute terms (0.2%). This  
57 latter tended to be confined to babies of extreme prematurity born well before routine  
58 screening for GDM. It is important to note that these findings, in a retrospective analysis,  
59 may be subject to unrecognised selection bias or confounding and form part of a larger  
60 debate into the care for women with GDM.

1  
2  
3  
4  
5 It may be reasonable to hypothesise that, with such minimal overall hospital-wide changes,  
6 that it is simply a lower-risk cohort being now diagnosed with GDM. This is somewhat, but  
7 not completely, borne out by analysing the same outcomes in women with GDM before and  
8 after the change. While major outcomes such as caesarean section rates, hypertensive  
9 disorders, pre-term birth and macrosomia have seemingly not changed, there has been a  
10 reduction in third degree tears and a substantial decrease in the number of babies  
11 diagnosed with hypoglycaemia and admitted to SCN. This is suggestive of an increase in  
12 diagnoses represented by women on the milder end of the spectrum of GDM.  
13  
14

15 We have also demonstrated an increase in net costs of over A\$500 000 per annum. This is  
16 primarily due to employing a “high-risk” model of care to all women with GDM. As no  
17 overall changes were discovered in mode of delivery or admission to NICU/SCN, in-patient  
18 costs were not examined. In smaller cohorts, especially those analysed prospectively, it  
19 would be worthwhile to examine patient-level data and directly assign costs of care in both  
20 the antenatal and immediate post-partum period. Some outcome differences noted in  
21 Tables 5 and 6 in the outcomes of screen-positive women would be accounted for in such  
22 prospective data and unrecognised variation in costs (including inpatient care) may come to  
23 light. While the overall costs are seemingly not redeemed in the short term by marked  
24 improved outcomes, there may be unquantified health outcomes demonstrable in longer  
25 term analysis of women with GDM and their babies treated under this system.  
26  
27  
28  
29

30 While the new criteria are laudable in their efforts at uniformity of diagnosis and adverse  
31 outcome avoidance, and possibly have improved clinical outcomes in sub-groups of women  
32 previously not diagnosed with GDM, there is lack of quality evidence supporting their  
33 superiority over other systems of diagnosis. Thus, further research is needed in three main  
34 areas. Firstly, it would be desirable to have prospective (and ideally randomised controlled  
35 trial) evidence examining the impact of this system of diagnosis over others employed  
36 around the world. Secondly, long-term outcomes of the women with GDM and their  
37 children may uncover health benefits not accounted for in immediate analyses like those  
38 presented in this study, for instance with improvements in childhood obesity rates. There  
39 may indeed be quantifiable cost savings that can be compared with the initial increase in  
40 costs of care but appropriate budgetary measures to ensure the initial hospitals of care are  
41 adequately reimbursed are essential. Finally, it is important to investigate more economic  
42 ways of antenatally managing women with GDM particularly in the lower risk group, for  
43 example those easily controlled with simple dietary measures or the increasing use of  
44 metformin in those currently being prescribed insulin.  
45  
46  
47  
48  
49

## 50 Conclusion

51  
52 The annual incidence of GDM has immediately and markedly increased due to the change in  
53 diagnostic criteria with an increase in cost of care and with seemingly no clear changes in  
54 immediate clinical outcomes. Most particularly, macrosomia rates (>90<sup>th</sup>%), caesarean  
55 section rates and pre-term birth less than 37 weeks remain unchanged. We suggest that  
56 these results add weight to the need for longer-term data before confirming that  
57 HAPO/IADPSG criteria are superior to other systems of diagnosis. Such data would need to  
58 be derived from cohorts undergoing universal routine screening with these criteria, and  
59 quantifiable health benefits compared against increases in immediate costs of care such as  
60 we report here.

### Declaration of Interests

There were no conflicts of interest with regards to any of the three authors.

### Contributor and guarantor information

The corresponding author (TC) was responsible for the study design, literature review, collection and analysis of data, interpretation of clinical findings, writing of the manuscript and decision for submission. TC is responsible for the overall content and acts as guarantor. SB supervised the project and contributed to all of the above in a consulting role. AP contributed to planning and executing appropriate statistical analysis and with interpretation of the data. All authors contributed to the final manuscript review and final submission.

### Data Sharing Statement

There are no unpublished data from the study.

### **Role of the funding source**

The Royal Australian and New Zealand College of Obstetrics and Gynaecology, who awarded the Luke Proposch Perinatal Research Scholarship to the corresponding author to financially support this research, had no role in the study design, data collection, analysis and interpretation, writing of the report or decision to submit for publication. The corresponding author had full access to the data in the study and final responsibility for the decision to submit for publication.

### **Transparency Declaration**

The corresponding author (TC) affirms that the manuscript is an honest, accurate, and transparent account of the study being reported and that no important aspects of the study have been omitted.

1  
2  
3  
4  
5  
6  
7  
8  
9  
10  
11  
12  
13  
14  
15  
16  
17  
18  
19  
20  
21  
22  
23  
24  
25  
26  
27  
28  
29  
30  
31  
32  
33  
34  
35  
36  
37  
38  
39  
40  
41  
42  
43  
44  
45  
46  
47  
48  
49  
50  
51  
52  
53  
54  
55  
56  
57  
58  
59  
60

## Tables

Table 1 1991/1998 ADIPS versus 2014 IADPSG Criteria for diagnosing GDM

|                        | 1991/1998 ADIPS                                                                               |                                                         | 2014 IADPSG                                               |                                                                               | 2015 NICE                                               |                                                         |
|------------------------|-----------------------------------------------------------------------------------------------|---------------------------------------------------------|-----------------------------------------------------------|-------------------------------------------------------------------------------|---------------------------------------------------------|---------------------------------------------------------|
|                        | Type of test                                                                                  | Positive criteria                                       | Type of test                                              | Positive criteria                                                             | Type of test                                            | Positive criteria                                       |
| <b>Screening test</b>  | 50g non-fasting glucose challenge test<br><b>or</b><br>75g non-fasting glucose challenge test | $\geq$ 7.8mmol/L<br><br>$\geq$ 8.0mmol/L                | Nil                                                       | N/A                                                                           | Clinical risk assessment                                | Any one of five clinical risk factors <sup>9</sup>      |
| <b>Diagnostic test</b> | 75g, 2-hour fasting glucose tolerance test (two levels)                                       | Fasting $\geq$ 5.5mmol/L<br><br>2 hour $\geq$ 8.0mmol/L | 75g, 2-hour fasting glucose tolerance test (three levels) | Fasting $\geq$ 5.1mmol/L<br>1 hour $\geq$ 10mmol/L<br>2 hour $\geq$ 8.5mmol/L | 75g, 2-hour fasting glucose tolerance test (two levels) | Fasting $\geq$ 5.6mmol/L<br><br>2 hour $\geq$ 7.8mmol/L |

Table 2 Demographics of the 2014 and 2016 cohorts

|                          | 2014               | 2016               | p-value       |
|--------------------------|--------------------|--------------------|---------------|
| Total Deliveries         | 7010               | 7488               | n/a           |
| Age (yr)                 | 30.9 (30.8 – 31.0) | 31.2 (31.1 – 31.3) | <b>0.0016</b> |
| BMI (kg.m <sup>2</sup> ) | 24.8 (24.7 – 24.9) | 24.7 (24.6 – 24.8) | 0.28          |
| PCOS                     | 110 (1.57%)        | 151 (2.02%)        | <b>0.043</b>  |
| Smoking                  | 326 (4.65%)        | 303 (4.05%)        | 0.075         |
| Parity $\geq$ 1          | 3228 (46.1%)       | 3365 (44.9%)       | 0.18          |
| Previous LUSCS           | 960 (13.7%)        | 1027 (13.7%)       | 0.45          |

Table 3 Overall Maternal Outcomes in 2014 and 2016

|                              | 2014         | 2016         | p-value     |
|------------------------------|--------------|--------------|-------------|
| <b>Hypertensive disorder</b> | 332 (4.74%)  | 361 (4.82%)  | 0.81        |
| Induction of labour          | 2407 (34.3%) | 2725 (36.4%) | <b>0.01</b> |
| <b>Overall LUSCS rate</b>    | 1963 (28.0%) | 2070 (27.6%) | 0.63        |
| Emergency LUSCS rate         | 1088 (15.5%) | 1076 (14.3%) | 0.05        |
| Instrumental birth           | 1316 (18.8%) | 1513 (20.2%) | <b>0.03</b> |
| Third degree tear            | 217 (3.1%)   | 197 (2.6%)   | 0.09        |
| PPH                          | 1685 (24.0%) | 1765 (23.6%) | 0.51        |

Table 4 Overall Fetal Outcomes in 2014 and 2016

|                                    | 2014               | 2016               | p-value     |
|------------------------------------|--------------------|--------------------|-------------|
| EGA                                | 38.6 (38.6 – 38.7) | 38.6 (38.5 – 38.6) | 0.18        |
| Stillbirth                         | 36 (0.51%)         | 40 (0.53%)         | 0.86        |
| NND                                | 29 (0.41%)         | 16 (0.21%)         | <b>0.03</b> |
| Hypoglycaemia                      | 154 (2.20%)        | 170 (2.27%)        | 0.77        |
| Respiratory distress               | 140 (2.00%)        | 170 (2.27%)        | 0.26        |
| Jaundice<br>requiring phototherapy | 112 (1.60%)        | 135 (1.80%)        | 0.34        |
| Apgar < 7 at 5 min                 | 280 (3.99%)        | 286 (3.82%)        | 0.59        |
| <b>Birth &lt; 37 weeks</b>         | 645 (9.20%)        | 671 (8.96%)        | 0.62        |
| Birth < 34 weeks                   | 292 (4.17%)        | 325 (4.34%)        | 0.61        |
| Shoulder dystocia                  | 102 (1.46%)        | 131 (1.75%)        | 0.16        |
| Admission to NICU                  | 320 (4.56%)        | 366 (4.89%)        | 0.36        |
| Admission to SCN                   | 534 (7.62%)        | 537 (7.17%)        | 0.31        |
| <b>Birthweight (g)</b>             | 3289 (3274 – 3304) | 3275 (3271 – 3293) | 0.21        |
| Birthweight > 95%                  | 300 (4.31%)        | 269 (3.61%)        | <b>0.03</b> |
| <b>Birthweight &gt; 90%</b>        | 577 (8.28%)        | 586 (7.86%)        | 0.36        |
| Birthweight < 10%                  | 570 (8.18%)        | 616 (8.27%)        | 0.85        |
|                                    |                    |                    |             |

Table 5 Maternal Outcomes of Women with GDM in 2014 compared to 2016

|                       | 2014        | 2016        | p-value      |
|-----------------------|-------------|-------------|--------------|
| Total                 | 416         | 774         | N/A          |
| Hypertensive disorder | 20 (4.80%)  | 35 (4.52%)  | 0.85         |
| Induction of labour   | 204 (49.0%) | 379 (49.0%) | 0.98         |
| Overall LUSCS rate    | 162 (38.9%) | 289 (37.3%) | 0.59         |
| Emergency LUSCS rate  | 71 (17.1%)  | 121 (15.6%) | 0.52         |
| Instrumental birth    | 83 (20.0%)  | 134 (17.3%) | 0.26         |
| Third degree tear     | 22 (5.29%)  | 20 (2.58%)  | <b>0.016</b> |
| PP H                  | 121 (29.1%) | 205 (26.5%) | 0.34         |

Table 6 Fetal Outcomes of Women with GDM in 2014 compared to 2016

|                                 | 2014               | 2016               | p-value      |
|---------------------------------|--------------------|--------------------|--------------|
| EGA                             | 37.8 (37.6 – 38.1) | 38.0 (37.9 – 38.2) | 0.13         |
| Stillbirth                      | 5 (1.20%)          | 3 (0.39%)          | 0.10         |
| NND                             | 0.00%              | 1 (0.13%)          | N/A          |
| Hypoglycaemia                   | 40 (9.62%)         | 46 (5.94%)         | <b>0.02</b>  |
| Respiratory distress            | 11 (2.64%)         | 12 (1.55%)         | 0.19         |
| Jaundice requiring phototherapy | 9 (2.16%)          | 12 (1.55)          | 0.44         |
| Apgar < 7 at 5 mins             | 19 (4.57%)         | 26 (3.36%)         | 0.30         |
| Birth < 37 weeks                | 51 (12.3%)         | 83 (10.7%)         | 0.42         |
| Birth < 34 weeks                | 25 (6.01%)         | 30 (3.88%)         | 0.10         |
| Shoulder dystocia               | 7 (1.68%)          | 5 (0.65%)          | 0.09         |
| Admission to NICU               | 27 (6.49%)         | 39 (5.04%)         | 0.30         |
| Admission to SCN                | 52 (12.5%)         | 60 (7.75%)         | <b>0.007</b> |
| Birthweight                     | 3151 (3089 – 3213) | 3207 (3167 – 3248) | 0.12         |
| Birthweight > 95%               | 27 (6.49%)         | 35 (4.52%)         | 0.15         |
| Birthweight > 90%               | 48 (11.5%)         | 74 (9.56%)         | 0.28         |
| Birthweight < 10%               | 38 (9.13%)         | 60 (7.75%)         | 0.41         |

## References

1. ADIPS Consensus Guidelines for the Testing and Diagnosis of Hyperglycaemia in Pregnancy in Australia and New Zealand. [www.adips.org.au](http://www.adips.org.au) (accessed January 2018). 2014.
2. Metzger BE, Gabbe SG, Persson B, et al. International association of diabetes and pregnancy study groups recommendations on the diagnosis and classification of hyperglycemia in pregnancy. *Diabetes Care*. 2010;33:676-82
3. Metzger BE, Lowe LP, Dyer AR, et al. Hyperglycemia and adverse outcomes. *N Engl J Med*. 2008;358:1991-2002
4. Martin FI, Vogue A, Dargaville R, et al. The diagnosis of gestational diabetes. *Med J Aust*. 1991;155:112
5. Hoffman L, Nolan C, Wilson JD, Oats JJ, Simmons D. Gestational diabetes mellitus--management guidelines. The Australasian Diabetes in Pregnancy Society. *Med J Aust*. 1998;169:93-7
6. Moses RG, Morris GJ, Petocz P, San Gil F, Garg D. The impact of potential new diagnostic criteria on the prevalence of gestational diabetes mellitus in Australia. *Med J Aust*. 2011;194:338-40.
7. Wong VW, Lin A, Russell H. Adopting the new World Health Organization diagnostic criteria for gestational diabetes: How the prevalence changes in a high-risk region in Australia. *Diabetes Res Clin Pract*. 2017;129:148-53
8. Flack JR, Ross GP. Survey on testing for gestational diabetes mellitus in Australia. *Aust N Z J Obstet Gynaecol*. 2016;56:346-8
9. National Institute for Health and Care Excellence. <https://pathways.nice.org.uk/pathways/diabetes-in-pregnancy> 2016 (accessed January 2018).
10. American Diabetes Association. Classification and Diagnosis of Diabetes. *Diabetes Care*. 2016;39 Suppl 1:S13-22
11. Canadian Diabetes Association Clinical Practice Guidelines Expert Committee. Thompson D, Berger H, Feig D, et al. Diabetes and pregnancy. *Can J Diabetes*. 2013;37 Suppl 1:S168-83
12. Dobbins TA, Sullivan EA, Roberts CL, Simpson JM. Australian National Birthweight Percentiles by Sex and Gestational Age, 1998-2007. *MJA*. 2012;197:291-4
13. Diagnostic criteria and classification of hyperglycemia first detected in pregnancy: a World Health Organization Guideline. *Diabetes Res Clin Pract*. 2014;103:341-63
14. Jacklin PB, Maresh MJ, Patterson CC, Stanley KP, Dornhorst A, Burman-Roy S, et al. A cost-effectiveness comparison of the NICE 2015 and WHO 2013 diagnostic criteria for women with gestational diabetes with and without risk factors. *BMJ Open*. 2017;7:e016621
15. Farrar D, Simmonds M, Griffin S, et al. The identification and treatment of women with hyperglycaemia in pregnancy: an analysis of individual participant data, systematic reviews, meta-analyses and an economic evaluation. *HTA* 2016;20:86.
16. Basevi V, Di Mario S, Morciano C, Nonino F, Magrini N. Comment on: American Diabetes Association. Standards of medical care in diabetes--2011. *Diabetes Care* 2011;34(Suppl. 1):S11-S61. *Diabetes Care*. 2011;34:e53
17. Ohno MS, Sparks TN, Cheng YW, Caughey AB. Treating mild gestational diabetes mellitus: a cost-effectiveness analysis. *Am J Obstet Gynecol*. 2011;205:282 e1-7

- 1
  - 2
  - 3
  - 4
  - 5
  - 6
  - 7
  - 8
  - 9
  - 10
  - 11
  - 12
  - 13
  - 14
  - 15
  - 16
  - 17
  - 18
  - 19
  - 20
  - 21
  - 22
  - 23
  - 24
  - 25
  - 26
  - 27
  - 28
  - 29
  - 30
  - 31
  - 32
  - 33
  - 34
  - 35
  - 36
  - 37
  - 38
  - 39
  - 40
  - 41
  - 42
  - 43
  - 44
  - 45
  - 46
  - 47
  - 48
  - 49
  - 50
  - 51
  - 52
  - 53
  - 54
  - 55
  - 56
  - 57
  - 58
  - 59
  - 60
18. Lee GT, Satyan MT, Grothusen JD, et al. A retrospective study comparing outcomes in a midwestern US population after introduction of IADPSG guidelines for gestational diabetes. *The journal of maternal-fetal & neonatal medicine*. 2017;1-6
19. Farrar D, Duley L, Dowswell T, Lawlor DA. Different strategies for diagnosing gestational diabetes to improve maternal and infant health. *Cochrane Database Syst Rev*. 2017;8:CD007122
20. Laafira A, White SW, Griffin CJ, Graham D. Impact of the new IADPSG gestational diabetes diagnostic criteria on pregnancy outcomes in Western Australia. *Aust N Z J Obstet Gynaecol*. 2016;56:36-41
21. Jiang S, Chipps D, Cheung WN, Mongelli M. Comparison of adverse pregnancy outcomes based on the new IADPSG 2010 gestational diabetes criteria and maternal body mass index. *Aust N Z J Obstet Gynaecol*. 2017;57:533-9
22. Abell SK, Teede HJ. The IADPSG diagnostic criteria identify women with increased risk of adverse pregnancy outcomes in Victoria. *Aust N Z J Obstet Gynaecol*. 2017;57:564-8

STROBE Statement—Checklist of items that should be included in reports of *cohort studies*

|                              | Item No | Recommendation                                                                                                                                                                                                                                                                                                                                                                                                                                                                                                                                         |
|------------------------------|---------|--------------------------------------------------------------------------------------------------------------------------------------------------------------------------------------------------------------------------------------------------------------------------------------------------------------------------------------------------------------------------------------------------------------------------------------------------------------------------------------------------------------------------------------------------------|
| <b>Title and abstract</b>    | 1       | (a) Indicate the study's design with a commonly used term in the title or the abstract<br><b>Yes (page 1)</b><br>(b) Provide in the abstract an informative and balanced summary of what was done and what was found <b>Yes (page 2)</b>                                                                                                                                                                                                                                                                                                               |
| <b>Introduction</b>          |         |                                                                                                                                                                                                                                                                                                                                                                                                                                                                                                                                                        |
| Background/rationale         | 2       | Explain the scientific background and rationale for the investigation being reported<br><b>Yes (page 3)</b>                                                                                                                                                                                                                                                                                                                                                                                                                                            |
| Objectives                   | 3       | State specific objectives, including any prespecified hypotheses <b>Yes (page 3)</b>                                                                                                                                                                                                                                                                                                                                                                                                                                                                   |
| <b>Methods</b>               |         |                                                                                                                                                                                                                                                                                                                                                                                                                                                                                                                                                        |
| Study design                 | 4       | Present key elements of study design early in the paper <b>Yes (page 3-4)</b>                                                                                                                                                                                                                                                                                                                                                                                                                                                                          |
| Setting                      | 5       | Describe the setting, locations, and relevant dates, including periods of recruitment, exposure, follow-up, and data collection <b>Yes (page 3)</b>                                                                                                                                                                                                                                                                                                                                                                                                    |
| Participants                 | 6       | (a) Give the eligibility criteria, and the sources and methods of selection of participants. Describe methods of follow-up <b>Yes – no exclusion criteria (page 3)</b><br>(b) For matched studies, give matching criteria and number of exposed and unexposed <b>N/A</b>                                                                                                                                                                                                                                                                               |
| Variables                    | 7       | Clearly define all outcomes, exposures, predictors, potential confounders, and effect modifiers. Give diagnostic criteria, if applicable <b>Yes (page 4)</b>                                                                                                                                                                                                                                                                                                                                                                                           |
| Data sources/<br>measurement | 8*      | For each variable of interest, give sources of data and details of methods of assessment (measurement). Describe comparability of assessment methods if there is more than one group <b>Yes (page 4)</b>                                                                                                                                                                                                                                                                                                                                               |
| Bias                         | 9       | Describe any efforts to address potential sources of bias <b>Yes (page 4 and 7)</b>                                                                                                                                                                                                                                                                                                                                                                                                                                                                    |
| Study size                   | 10      | Explain how the study size was arrived at <b>Yes (entire cohort, page 4)</b>                                                                                                                                                                                                                                                                                                                                                                                                                                                                           |
| Quantitative variables       | 11      | Explain how quantitative variables were handled in the analyses. If applicable, describe which groupings were chosen and why <b>Yes (page 4)</b>                                                                                                                                                                                                                                                                                                                                                                                                       |
| Statistical methods          | 12      | (a) Describe all statistical methods, including those used to control for confounding <b>Yes, confounding not particularly relevant as outcomes were examined across whole cohorts (page 4-5)</b><br>(b) Describe any methods used to examine subgroups and interactions <b>N/A (no subgroups)</b><br>(c) Explain how missing data were addressed <b>N/A (nil was missing)</b><br>(d) If applicable, explain how loss to follow-up was addressed <b>N/A (nil lost to follow-up)</b><br>(e) Describe any sensitivity analyses <b>N/A (not required)</b> |
| <b>Results</b>               |         |                                                                                                                                                                                                                                                                                                                                                                                                                                                                                                                                                        |
| Participants                 | 13*     | (a) Report numbers of individuals at each stage of study—eg numbers potentially eligible, examined for eligibility, confirmed eligible, included in the study, completing follow-up, and analysed <b>Yes (page 5)</b><br>(b) Give reasons for non-participation at each stage <b>N/A (retrospective analysis with no possibility for non-participation)</b><br>(c) Consider use of a flow diagram <b>Not used</b>                                                                                                                                      |
| Descriptive data             | 14*     | (a) Give characteristics of study participants (eg demographic, clinical, social) and information on exposures and potential confounders <b>Yes (page 5 and Table 2)</b><br>(b) Indicate number of participants with missing data for each variable of interest <b>Nil missing</b>                                                                                                                                                                                                                                                                     |

|                          |     |                                                                                                                                                                                                                                                                                                                                                                                                                                                                       |
|--------------------------|-----|-----------------------------------------------------------------------------------------------------------------------------------------------------------------------------------------------------------------------------------------------------------------------------------------------------------------------------------------------------------------------------------------------------------------------------------------------------------------------|
|                          |     | (c) Summarise follow-up time (eg, average and total amount) <b>N/A (examined at time of delivery – no long-term follow up)</b>                                                                                                                                                                                                                                                                                                                                        |
| Outcome data             | 15* | Report numbers of outcome events or summary measures over time <b>Yes (page 5-6)</b>                                                                                                                                                                                                                                                                                                                                                                                  |
| Main results             | 16  | (a) Give unadjusted estimates and, if applicable, confounder-adjusted estimates and their precision (eg, 95% confidence interval). Make clear which confounders were adjusted for and why they were included <b>Yes (page 5-6, tables 3-4)</b><br>(b) Report category boundaries when continuous variables were categorized <b>N/A</b><br>(c) If relevant, consider translating estimates of relative risk into absolute risk for a meaningful time period <b>N/A</b> |
| Other analyses           | 17  | Report other analyses done—eg analyses of subgroups and interactions, and sensitivity analyses <b>N/A</b>                                                                                                                                                                                                                                                                                                                                                             |
| <b>Discussion</b>        |     |                                                                                                                                                                                                                                                                                                                                                                                                                                                                       |
| Key results              | 18  | Summarise key results with reference to study objectives <b>Yes (page 6-7)</b>                                                                                                                                                                                                                                                                                                                                                                                        |
| Limitations              | 19  | Discuss limitations of the study, taking into account sources of potential bias or imprecision. Discuss both direction and magnitude of any potential bias <b>Yes (page 7)</b>                                                                                                                                                                                                                                                                                        |
| Interpretation           | 20  | Give a cautious overall interpretation of results considering objectives, limitations, multiplicity of analyses, results from similar studies, and other relevant evidence <b>Yes (page 7-8)</b>                                                                                                                                                                                                                                                                      |
| Generalisability         | 21  | Discuss the generalisability (external validity) of the study results <b>Yes (page 8)</b>                                                                                                                                                                                                                                                                                                                                                                             |
| <b>Other information</b> |     |                                                                                                                                                                                                                                                                                                                                                                                                                                                                       |
| Funding                  | 22  | Give the source of funding and the role of the funders for the present study and, if applicable, for the original study on which the present article is based <b>Yes (page 8)</b>                                                                                                                                                                                                                                                                                     |

\*Give information separately for exposed and unexposed groups.

**Note:** An Explanation and Elaboration article discusses each checklist item and gives methodological background and published examples of transparent reporting. The STROBE checklist is best used in conjunction with this article (freely available on the Web sites of PLoS Medicine at <http://www.plosmedicine.org/>, Annals of Internal Medicine at <http://www.annals.org/>, and Epidemiology at <http://www.epidem.com/>). Information on the STROBE Initiative is available at <http://www.strobe-statement.org>.
